# Supplementary material for: Association between socioeconomic position and occupational health service utilisation trajectories among young municipal employees in Finland
Source: PubMed Central journal article supplement (PMC6887011; doi:10.1136/bmjopen-2018-028742), 2019-11-27
Supplement: bmjopen-2018-028742.draft_revisions.pdf [file bmjopen-2018-028742.draft_revisions.pdf]

# BMJ Open

BMJ Open is committed to open peer review. As part of this commitment we make the peer review history of every article we publish publicly available.

When an article is published we post the peer reviewers' comments and the authors' responses online. We also post the versions of the paper that were used during peer review. These are the versions that the peer review comments apply to.

The versions of the paper that follow are the versions that were submitted during the peer review process. They are not the versions of record or the final published versions. They should not be cited or distributed as the published version of this manuscript.

BMJ Open is an open access journal and the full, final, typeset and author-corrected version of record of the manuscript is available on our site with no access controls, subscription charges or pay-per-view fees (<http://bmjopen.bmj.com>).

If you have any questions on BMJ Open's open peer review process please email [info.bmjopen@bmj.com](mailto:info.bmjopen@bmj.com)

# BMJ Open

## Young Employees' Trajectories and Occupational Class Differences in Utilization of Primary Care Services Provided by Occupational Health Service

|                               |                                                                                                                                                                                                                                                                                                                                                                                                                                                                                                                |
|-------------------------------|----------------------------------------------------------------------------------------------------------------------------------------------------------------------------------------------------------------------------------------------------------------------------------------------------------------------------------------------------------------------------------------------------------------------------------------------------------------------------------------------------------------|
| Journal:                      | <i>BMJ Open</i>                                                                                                                                                                                                                                                                                                                                                                                                                                                                                                |
| Manuscript ID                 | bmjopen-2018-028742                                                                                                                                                                                                                                                                                                                                                                                                                                                                                            |
| Article Type:                 | Research                                                                                                                                                                                                                                                                                                                                                                                                                                                                                                       |
| Date Submitted by the Author: | 09-Jan-2019                                                                                                                                                                                                                                                                                                                                                                                                                                                                                                    |
| Complete List of Authors:     | Sumanen, Hilla; South-Eastern Finland University of Applied Sciences, Health care and emergency care; University of Helsinki, Public Health<br>Harkko, Jaako; University of Helsinki, Social Sciences<br>Piha, Kustaa ; University of Helsinki, Public Health<br>Pietilainen, Olli; University of Helsinki, Department of Public Health<br>Rahkonen, Ossi; University of Helsinki, Department of Public Health<br>Kouvonen, Anne; Helsingin Yliopisto, Faculty of Social Sciences; Queen's University Belfast, |
| Keywords:                     | health care visits, socioeconomic differences, young adults                                                                                                                                                                                                                                                                                                                                                                                                                                                    |
|                               |                                                                                                                                                                                                                                                                                                                                                                                                                                                                                                                |

SCHOLARONE™  
Manuscripts

1  
2  
3 Young Employees' Trajectories and Occupational Class Differences in Utilization of Primary Care  
4  
5 Services Provided by Occupational Health Service  
6  
7  
8  
9  
10

11 Hilla Sumanen, PhD 1,2

12 Jaakko Harkko, PhD 3

13 Kustaa Piha, PhD 2

14 Olli Pietiläinen, MSc 2

15 Ossi Rahkonen, Professor 2

16 Anne Kouvonen, Professor 3, 4, 5

- 17  
18  
19  
20  
21  
22  
23 1. South-Eastern Finland University of Applied Sciences, Unit of Healthcare and Emergency  
24 care and Unit of Research, Development and Innovation  
25 2. University of Helsinki, Faculty of Medicine, Department of Public Health  
26 3. University of Helsinki, Faculty of Social Sciences  
27 4. SWPS University of Social Sciences and Humanities in Wrocław  
28 5. Queen's University Belfast, Administrative Data Research Centre – Northern Ireland,  
29 Centre for Public Health  
30  
31  
32  
33  
34

35 Correspondence to: Hilla Sumanen, Department of Public Health, University of Helsinki, Finland,  
36 P.O. Box 20 (Tukholmankatu 8B), FIN-00014, University of Helsinki, Finland;  
37 [hilla.sumanen@helsinki.fi](mailto:hilla.sumanen@helsinki.fi)  
38  
39  
40  
41  
42  
43  
44  
45  
46  
47  
48  
49  
50  
51  
52  
53  
54  
55  
56  
57  
58  
59  
60

### **What is already known about this subject?**

This is the first study utilizing longitudinal occupational health service data. All the findings are novel.

### **What are the new findings?**

We identified four occupational health service utilization groups among young employees: “No visits” (50%), “Low/increasing” (18%), “Low/decreasing” (22%) and “High/recurrent” (10%) use. Lower occupational classes had a higher propensity for “High/recurrent” OHS utilization for both genders.

### **How might this impact on policy or clinical practice in the foreseeable future?**

Preventive measures should be targeted particularly to the trajectory groups of “Low/increasing” and “High/recurrent” in order to intervene early. Occupational health service utilization should be more closely monitored among the two lowest occupational classes.

Running head: Young Employees’ Utilization of Occupational Health Service

## Abstract

**OBJECTIVES:** To identify groups of municipal employees between the ages of 20 and 34 years with distinct utilization trajectories of primary care services provided by occupational health service (OHS), measured as the annual number of OHS visits, and to identify demographic and socio-economic risk factors that distinguish employees in the high utilization trajectory group(s).

**METHODS:** The present study is a retrospective register-based cohort study. All municipal employees of the City of Helsinki, Finland, aged 20-34 in the Helsinki Health Study (HHS), recruited from 2004 to 2013, with follow-up data for four years were included in the study (n = 10,064). The outcome measure was group-based trajectories of OHS utilization, identified with a group-based trajectory analysis (GBTA). The demographic and socio-economic variables used to predict the outcome were age, first language, educational level and occupational class. The analyses were stratified by gender.

**RESULTS:** A large proportion of the young employees do not utilize OHS. Trajectory groups of "No visits" (50%), "Low/increasing" (18%), "Low/decreasing" (22%) and "High/recurrent" (10%) use were identified. We found occupational class differences in OHS utilization patterns showing that lower occupational classes had a higher propensity for "High/recurrent" OHS utilization for both genders.

**CONCLUSIONS:** Preventive measures should be targeted particularly to the trajectory groups of "Low/increasing" and "High/recurrent" in order to intervene early. In addition, OHS utilization should be closely monitored among the two lowest occupational classes. More research with longitudinal OHS data is needed.

**Key terms:** Health care visits, Socioeconomic differences, Young adults, Women, Men

### Strengths and limitations of this study

- This is the first study utilizing longitudinal occupational health service data
- The sample consisted all of 20-34-year-old employees of the City of Helsinki. The occupational health care policies are same for all these employees and have remained same during the study period of 2004-2017.
- Our study avoids a common limitation of occupational health service studies that they are based on limited samples with data on only those attending the service or those responding the survey questionnaire.
- Limitations of the data include the lack of diagnostic information and lifestyle factors.
- The lack of other primary care visits outside the occupational health service limits the interpretation of the results.

## Introduction

Finland has a unique occupational health service (OHS) system with statutory prevention of occupational health hazards (preventive services) and additionally purchased primary care services. OHS may be provided by employer's own OHS units, private clinics or public health centers with specifically educated occupational health physicians, nurses, physiotherapists and psychologists. In Finland, most employers purchase the additional primary care element for their employees. From 2006 to 2016, 91 to 95% of the employees covered by statutory preventive OHS also had an access to primary care paid by their employer and partly subsidized by National Pension Fund [1]. OHSs are free for employees at the point of delivery.

The utilization of OHS in Finland or elsewhere has been only scarcely studied, and previous studies using longitudinal data do not exist. There are few previous Finnish studies concentrating on the OHS primary care visits from the viewpoint of service use over the course of 6 to 12 months. A recent study [2] with data from a large private Finnish OHS provider investigated the top 10% frequent attenders in primary care services in 2015. The results showed that frequent attendance was associated with female gender, being employed by a medium or a large company, working in the manufacturing industry, public administration or in health and social care services. In an earlier study with survey data (N=1636) from the Finnish working-age population [3], 57% of Finnish employees covered by the OHS primary care visited either occupational health physician or nurse due to any illness during the 6-month period. In that study, those visits were strongly associated with chronic illness impacting occupational health and work ability. Both previous studies utilizing Finnish OHS data acknowledge the lack of research focusing to these unique services provided for the working population and identify the need for further study to identify service development needs and possibilities.

The current study utilizes longitudinal data from the own OHS unit of Finland's largest employer. The City of Helsinki offers same OHSs with primary care for all its employees (n~38 000 per

1  
2  
3 year) with no cost for the employees. The City of Helsinki employees have been the focus of the  
4  
5 Helsinki Health Study [4] since 2000, but this is the first study using their OHS data. Our focus is  
6  
7 on the younger employees and their OHS utilization, as previous studies have shown that they have  
8  
9 a high prevalence of sickness absence (SA) [5] and there are already large socioeconomic  
10  
11 differences in SA apparent in the younger age groups [6-7]. Reducing SA is high on employers'  
12  
13 agenda. Service utilization information is important for planning preventive actions via targeted  
14  
15 interventions or improving case management protocols [8-9] arranged by the OHS. According to  
16  
17 extensive Finnish and international evidence socioeconomic differences in SA are large among  
18  
19 employees [10-21], thus the differences in OHS utilization is feasible to monitor from the  
20  
21 socioeconomic viewpoint and to be able to identify groups for interventions.  
22  
23  
24

25  
26 In our study, we aimed to identify developmental trajectories in OHS primary care service  
27  
28 utilization in the municipal employees of the City of Helsinki between the ages of 20 and 34 years  
29  
30 from 2004 to 2017. In the second stage of the analysis we aimed to identify demographic and socio-  
31  
32 economic determinants of belonging to different trajectory groups. We tested the hypothesis that  
33  
34 lower occupational classes have a higher risk of high OHS utilization, when differences in terms of  
35  
36 personal characteristics (age, education, first language) are brought into the analysis.  
37  
38  
39  
40  
41  
42  
43  
44

## 45 **Methods**

46  
47 This is a retrospective register-based cohort study. The study is a part of the Helsinki Health Study  
48  
49 on health and well-being among employees of the City of Helsinki, Finland [4]. The study covered  
50  
51 all Helsinki City employees aged 20-34 at the beginning of their first work contract with the City (N  
52  
53 = 23,388) between 04/06/2004 and 04/19/2013. For each employee the follow-up started from their  
54  
55 initial recruitment and only employees with employment record for four years were retained in the  
56  
57  
58  
59  
60

1  
2  
3 present study (n = 10,064). The length of the follow-up was measured as calendar days in  
4  
5 employment.  
6  
7

8 OHS utilization was the outcome of the study. It was measured by the annual number of outpatient  
9  
10 visits ranging from 0 to 103. The demographic and socioeconomic variables used to predict the  
11  
12 outcome were age, first language, educational level and occupational class. The analyses were  
13  
14 stratified by gender.  
15  
16

17  
18 Age was categorized into three groups: 20-24, 25-29 and 30-34-year-olds. First language was  
19  
20 categorized as: Finnish, Swedish, Other. Education was classified into three levels: higher education  
21  
22 (a Master's or a doctor's degree), upper secondary (a Bachelor's degree), and lower secondary  
23  
24 (upper-secondary school, vocational school) or basic education (comprehensive school) .  
25  
26

27 Occupational class was measured with four classes: "managers and professionals" (e.g. teachers and  
28  
29 physicians), "semi-professionals" (e.g. nurses and foremen), "routine non-manuals" (e.g. clerical  
30  
31 employees and childminders) and "manual workers" (e.g. technical and cleaning staff).  
32  
33  
34

35 The employer's personnel and occupational health care registers were used to obtain socio-  
36  
37 demographic characteristics and information on OHS use. Educational level was obtained from  
38  
39 annually updated Statistics Finland's registry of completed education and degrees, and was linked  
40  
41 to the City of Helsinki personnel register.  
42  
43  
44

#### 45 *Ethics*

46  
47

48 The study follows the Helsinki Health Study protocol in line with the University of Helsinki's  
49  
50 guidelines and data legislation. The ethics committees of the Department of Public Health, the  
51  
52 University of Helsinki and the health authorities of the City of Helsinki have approved the HHS  
53  
54 study. The City of Helsinki and register holders have given permission for data linkage.  
55  
56  
57  
58  
59  
60



### *Patient and Public Involvement statement*

No Patient or Public Involvement.

### *Statistical methods*

Group-based trajectory modeling (GBTM) with Stata's *traj* command [22] was applied to identify clusters of individuals, or trajectory groups, with similar developmental trajectory on OHS utilization. The method assigns a subject to a trajectory group by assessing the probability of group membership. The count variables were assumed to be Poisson-distributed and zero inflated Poisson models were applied. The ideal number of trajectory groups and trajectory shapes were assessed by four criteria suggested by the existing literature: Bayesian information criteria (BIC), posterior probabilities of trajectory group membership higher than .70, sizes of trajectory groups larger than 5% and a distinct interpretability of the identified trajectory groups [23,24]. Subsequently, multinomial logistic regression models using Stata's *mlogit* command were applied to investigate the role of occupational class as a predictor of the trajectory group membership. In a two-step-analysis, estimates are given for occupational class, first, adjusted for age and first language and, second, additionally adjusted for education. The trajectory cluster indicating the lowest health care utilization was defined as the reference group in the analysis. The results are given as relative risk ratios (RRR) with their 95% confidence intervals (CIs). All statistical analyses were performed with Stata 15.

## **Results**

### *Descriptive results*

The study sample included 10,064 the City of Helsinki employees aged between 20 and 34 at the beginning of the follow-up. 27% of the employees were men and 73% women. Among men, the

1  
2  
3 yearly average of OHS visits was 1.03 (SD, 1.44) during the mean of 1341 days of follow-up.

4  
5 Among women, the yearly average was 1.16 (SD, 1.50) OHS visits in the mean of 1328 days. Of  
6  
7 the subjects of the study, 2272 (23%) were managers or professionals, 1824 (19%) semi-  
8  
9 professionals, 4064 (42%) routine non-manual workers, and 1602 (16%) manual workers (Tables 1-  
10  
11 2). Whereas managers/professionals had an equal gender distribution, semi-professionals and  
12  
13 routine non-manual workers were more often women whereas men constituted the majority of  
14  
15 routine non-manual workers were more often women whereas men constituted the majority of  
16  
17 manual workers. Occupational class was closely linked to educational attainment in both genders.

18  
19  
20 In trajectory analysis, a trajectory model consisting of four distinct trajectories including 1  
21  
22 trajectory with a linear, 1 with a quadratic, and 2 with a cubic shape showed the best fit using the  
23  
24 BIC criterion (Figure 1). The largest identified trajectory group "No visits" (n = 5,106, 50%)  
25  
26 represents those with less than 0.2 annual OHS visits over the four years of follow-up. There were  
27  
28 two intermediate groups. The group labeled "Low/increasing" (n = 1,744, 18%) is characterized by  
29  
30 low number of visits during the first two years followed by a slight increase in visits during the next  
31  
32 two years. The group "Low/decreasing" (n = 2,238, 22%) follows a similar pattern as the group 2,  
33  
34 but in a reverse order. The members of the both low groups averaged 1.5 annual OHS visits during  
35  
36 the follow-up. The "High/recurrent" group (n = 976, 10%) consists of employees characterized by  
37  
38 high levels of OHS visits, with an average of 4.6 visits per year, from the initiation of the  
39  
40 employment to the end of the follow-up. The mean assignment probabilities were 0.93 for the "No  
41  
42 visits", 0.81 for the "Low/increasing", 0.82 for the "Low/decreasing", and 0.92 for the  
43  
44 "High/recurrent" trajectory groups, indicating a good model fit to the data. Of men, 54% belonged  
45  
46 to the "No visits" trajectory and 8.4% to the "High/recurrent" trajectory group, whereas the  
47  
48 corresponding figures for women were 50% and 10%, indicating a higher propensity for women to  
49  
50 belong to the "High/recurrent" trajectory group. The assignment of the members of different  
51  
52 occupational classes to different OHS trajectories followed the socio-economic gradient. Of  
53  
54 managers or professionals, 59% belonged to the "No visits" trajectory and 5% to the  
55  
56  
57  
58  
59  
60

1  
2  
3 “High/recurrent” trajectory. The corresponding figures for semi-professionals were 48% and 10%,  
4  
5 for routine non-manual workers 48% and 11%, and for manual workers 49% and 13%, respectively.  
6  
7  
8  
9

10  
11 \*\*\* Figure 1 \*\*\*  
12

13  
14 \*\*\* Table 1 \*\*\*  
15

16  
17 \*\*\* Table 2 \*\*\*  
18  
19  
20  
21  
22

### 23 *OHS utilization trajectories by occupational class*

24

25  
26 Occupational class was a strong independent predictor for the OHS utilization trajectories, as  
27  
28 demonstrated in Table 3. The likelihood of belonging to the “High/recurrent” trajectory was  
29  
30 increased for those being in a lower occupational class. For both women and men, the risk for  
31  
32 belonging to the “High/recurrent” trajectory was highest for manual workers, followed by routine  
33  
34 non-manual workers and semi-professionals.  
35  
36

37  
38 The independent effect of occupational class remained after adjustment for all covariates including  
39  
40 age, first language and education. The association was most evident in the “High/recurrent”  
41  
42 trajectory. The relative risk for this group membership was 2.92 (95% CI, 1.48 – 5.74) for male  
43  
44 routine non-manual workers and 3.56 (95% CI, 1.83 – 6.92) for male manual workers. The  
45  
46 corresponding figures for women were 2.28 (95% CI, 1.65 – 3.15) and 2.71 (95% CI, 1.85 – 3.97),  
47  
48 respectively. The results indicate that a proportion of the association between occupational class and  
49  
50 belonging to the “High/recurrent” trajectory is dependent on the lower educational attainment of the  
51  
52 members of the lower occupational classes. The results comparing the two low trajectories with the  
53  
54 “No visits” OHS trajectory were less clear in terms of statistical significance. Whereas all estimates  
55  
56 but one in “Low/decreasing” vs “No visits” comparison remained statistically significant after full  
57  
58  
59  
60

1  
2  
3 adjustment, four out of “Low/increasing” vs “No visits” comparisons become statistically non-  
4  
5 significant in the final model. The observed excess risks generated by occupational class were thus  
6  
7 smaller in both “Low” trajectories compared to “High/recurrent” trajectory. Notably, the relative  
8  
9 risks related to the membership of these middle trajectories were not manifested in a dose-exposure  
10  
11 manner as was the case with the “High/recurrent” trajectory.  
12  
13  
14  
15  
16  
17

18 \*\*\* Table 3 \*\*\*  
19  
20  
21  
22  
23

### 24 *Sensitivity analyses*

25  
26  
27 To assess the extent the parameter estimates were sensitive to potential errors in model specification  
28  
29 and data, two types of sensitivity analyses were performed. First, we reproduced estimates from the  
30  
31 original data with bootstrap resampling (1000 replications). Second, we reproduced the results with  
32  
33 logistic regression analyses defining the high-utilization group as those whose total number of  
34  
35 OHS visits during the follow-up period was 10 or more (n=1,484) was compared with those with no  
36  
37 or just one visit (n= 3,993). These sensitivity analyses indicated robustness of our inference about  
38  
39 the relationship between occupational class and OHS utilization trajectories.  
40  
41  
42  
43  
44  
45  
46

### 47 **Discussion**

48  
49  
50 In this study we identified developmental trajectories and socioeconomic differences in OHS  
51  
52 primary care service utilization among 20 to 34-year-old employees of the City of Helsinki from  
53  
54 2004 to 2017. Our key results were: 1) Half of the young employees did not use occupational health  
55  
56 care services to any considerable extent; 2) Higher occupational classes utilized less OHS; 3) Four  
57  
58 trajectory groups, that is, “No visits”, “Low/increasing”, “Low/decreasing” and “High/recurrent”,  
59  
60

1  
2  
3 were identified. 4) The trajectory group of “High/recurrent” included a larger number of lower class  
4  
5 workers especially among men, and the differences were large also among women. 5) Occupational  
6  
7 class differences in “Low/decreasing” group were evident in both genders. 6) Only in women there  
8  
9 were some occupational class differences in belonging to the trajectory group of “Low-increasing  
10  
11 OHS utilization”.

12  
13  
14  
15 Our results highlight the significance of socioeconomic gradient in the OHS utilization that was  
16  
17 visible both in men and women. The percentage of those who had no visits was the highest among  
18  
19 managers and professionals and the proportion of no visits decreased with when going down the  
20  
21 occupational class ladder. Respectively, high and recurrent use was smallest among managers and  
22  
23 professionals, and increased with decreasing occupational class, this type of use being the most  
24  
25 common among manual workers. A larger proportion of men had no visits at all in each  
26  
27 occupational class, thus the women used the health services more, in line with earlier findings [2].

28  
29  
30  
31 In a similar way, the high and recurrent use was higher among women than among men. In the  
32  
33 present context, primary care visits can be interpreted as an indicator of incidence of acute illnesses,  
34  
35 as the Finnish OHS system distinguish visits related to occupational health hazards. The present  
36  
37 results concerning primary care visits are in line with previous findings from our own and other  
38  
39 studies showing the socioeconomic differences in sickness absence among employees and the  
40  
41 gender differences in sickness absence, i.e. women having more absences than men [7,10,14,18,21].

42  
43  
44  
45 It can be assumed that large number of OHS visits precede sickness absence as also indicated by  
46  
47 Bergh et al. [25].

48  
49  
50 Stratified analyses indicated gender differences in OHS utilization. According to our results, among  
51  
52 men the occupational class differences disappeared after full adjustment in the trajectory group of  
53  
54 “Low/increasing”. This implies that the initial differences are associated with the type of work  
55  
56 tasks. In contrast, after full adjustment, among women the employees in the two lowest  
57  
58 occupational classes had a higher risk for belonging to this trajectory group. In the trajectory group  
59  
60

1  
2  
3 of “Low/decreasing” the differences were initially similar among the three lowest occupational  
4  
5 classes. However, the differences modestly increased after full adjustment, implying that there are  
6  
7 several factors associated with the low OHS utilization. This was seen among both genders.  
8  
9

10 The trajectory group of “High/recurrent” is perhaps the most interesting group alongside with the  
11  
12 “Low/increasing” group in terms of costs and possible preventive opportunities. According to our  
13  
14 results the occupational class differences in this group are steep especially among men, and also  
15  
16 large among women. After full adjustment the differences decreased more in men, suggesting that  
17  
18 the initial differences are more associated with work tasks among them. However, the differences  
19  
20 remained high in both genders after adjustments. Studies regarding socioeconomic differences in  
21  
22 sickness absence have also found that the differences are steeper among men [7,17,18], but the  
23  
24 former studies mostly concentrate on older employees.  
25  
26  
27

28  
29 The differences in physical and psychosocial demands between occupational classes are important  
30  
31 to take into account when interpreting the results. Manual workers have more physically demanding  
32  
33 jobs, which may affect their need for primary care services. Adverse working conditions may cause  
34  
35 ill-health and need of health services as milder even health difficulties may prevent these employees  
36  
37 from working. Employees in higher occupational classes typically have more complex and  
38  
39 mentally demanding jobs [26]. In studies examining the socioeconomic differences in sickness  
40  
41 absence, physical working conditions have been found to be the strongest explanatory factor  
42  
43 [12,16]. However, employees in our study are fairly young and thus adverse physical or  
44  
45 psychosocial working conditions might not have yet affected their health, as health-related effects  
46  
47 usually increase with age. In addition, the unique OHS system where the visits associated with  
48  
49 occupational health hazards (preventive services) are recorded separately from primary care visits  
50  
51 may contribute to the differences seen in our results. For example visits with more chronic work-  
52  
53 related reason are usually not recorded as primary care visits. Thus, the overall utilization of OHS  
54  
55 requires further research.  
56  
57  
58  
59  
60

1  
2  
3 Our study indicates that service use patterns might recognize vulnerable groups more precisely than  
4 just belonging to certain occupation or occupational class may do. Despite this, the two lowest  
5 occupational classes may need extra attention based on their OHS utilization patterns. Case  
6 management protocols are essential in coordinating patient-centered care path which also saves  
7 costs [8,9,27]. Among younger employees, timely treatment is highly important, as it might prevent  
8 the worsening of their condition. OHS should identify those employees who use services a lot.

9  
10  
11  
12  
13  
14  
15  
16  
17 Previous studies using OHS data are lacking, but some comparisons can be made with the studies  
18 investigating frequent attenders in primary care. Frequent attenders in primary care in the general  
19 population have been studied particularly in Netherlands and in Sweden using questionnaire surveys  
20 and record linkage. These studies had participants from a wide range of sociodemographic  
21 backgrounds and they consider only visits to general practitioners, thus their direct comparability to  
22 OHS utilization is difficult. In addition, the definition of frequent attender varies between studies  
23 [28]. However, previous studies have found out that frequent attenders have multiple reasons for  
24 presenting [29], but overall chronic illnesses [28], somatic diseases and symptoms [30,31] and  
25 especially psychiatric problems [30] have been associated with more frequent primary care service  
26 use. Frequent attenders have more health discomfort, low mastery, and they may be more  
27 vulnerable for stressful life events due to inadequate coping strategies [25,32,33]. Frequent  
28 attenders are a high-risk group for long-term sickness absence and disability pension [25].

29  
30  
31  
32  
33  
34  
35  
36  
37  
38  
39  
40  
41  
42  
43  
44  
45 According to two previous Dutch studies one out of every seven 1-year frequent attenders becomes  
46 persistent frequent attender and six out of seven are transient frequent attenders [30,34]. Based on  
47 this previous evidence the inclusion of diagnostic information would be important in future studies  
48 of OHS utilization. However, from methodological viewpoint both the Dutch and Swedish research  
49 groups point out that age should be taken into account when studying the frequent attenders, as not  
50 only the reasons for high service utilization but also what constitutes high use highly differ by age  
51 group [31,35].

### *Methodological considerations*

The registers used in this study are reliable and comprehensive. We focused on all occupational groups within the municipality and the sample consisted all of 20-34-year-old employees within this organization. The occupational health care policies are same for all these employees and have remained same during the study period of 2004-2017. Our study avoids a common limitation of OHS studies that they are based on limited samples with data on only those attending the service (e.g. 2) or those responding the survey questionnaire [3]. Another advantage of this study is that we could make inferences based on longitudinal cohort data instead of relying on just cross-sectional evidence. Limitations of the data include the lack of diagnostic information, lifestyle factors and other primary care visits outside the OHS.

The OHS system in Finland is unique, thus comparisons to other countries is difficult. Even within Finland, different employers can have different policies in terms of provision of primary care services. Nevertheless, our results can be broadly generalized to the Finnish public sector.

The present study is to our knowledge the first one that used longitudinal latent class analysis aiming to capture OHS utilization as a complex longitudinal phenomenon. GBTM approach mixes the application of formal statistical criteria and subjective evaluation in model fitting [23]. One of its strength is that it allowed us to identify high OHS utilization over time. It is a limitation that those who left the City of Helsinki within the first four years of their employment were lost to follow-up. Another benefit is that GBTM is capable of identifying different OHS trajectories within subjects that appear similar in terms of summary statistics. In this study we were able to distinguish between two “low” trajectories, which may allow for better planning of targeted prevention measures. However, we want to highlight that by this methodology it cannot be ascertained that the observed subgroups are distinct population subgroups. As in case of any latent trajectory class analyses, there is a possibility that the data could be interpreted as homogenous but non-normal



1  
2  
3 [36]. We find, however, the obtained groups to be realistic and the results applicable in terms of  
4  
5 real-life interpretations.  
6  
7  
8  
9

## 10 11 **Conclusions** 12 13

14 We used GBTM for distinguishing four different developmental trajectories in OHS primary care  
15 service utilization among 20-34-year-old employees of the City of Helsinki. Occupational class  
16 differences exist in the utilization development trajectories. A large proportion of the young  
17 employees do not use OHS primary care services and non-use is most common among the highest  
18 occupational class. Especially trajectories where the utilization has grown or been high throughout  
19 the follow-up had large occupational class differences, which followed the socioeconomic gradient.  
20 Identifying high utilization patterns is important as ten per cent of employees that may be labeled  
21 high and recurrent users account for 40% of the all OHS consultations.  
22  
23  
24  
25  
26  
27  
28  
29  
30  
31

32  
33 According to our results preventive measures should be considered among the trajectory groups of  
34 “Low/increasing” and “High/recurrent”. In addition, attention should be paid to the two lowest  
35 occupational classes, and their OHS utilization should be closely monitored by the occupational  
36 health care in order to identify those in need for extra support. OHS utilization requires more  
37 longitudinal research. Case management protocols should be further developed.  
38  
39  
40  
41  
42  
43  
44  
45  
46  
47

## 48 **Author contributions** 49 50 51

52 HS, AK & JH designed the study. HS mainly wrote the manuscript with contributions and  
53 comments from all the other authors, JH did the statistical analyses and wrote the results section and  
54 OP commented those. All the authors have approved the final version of the manuscript.  
55  
56  
57  
58  
59  
60

## Conflicts of Interest & Funding

Authors declare no conflicts of interest. This study was funded by the Finnish Work Environment Fund (grant 117321) and the Academy of Finland (grant 315343). AK was funded by the Economic and Social Research Council (ESRC) (grant ES/L007509/1). OR was funded by the Academy of Finland (grant 1294514). The funders had no involvement to the preparation of the manuscript.

## Data sharing statement

No additional data available.

## References

1. Kelasto-reports. 2018. Selected data for report Occupational health care for employers: Number of persons covered and reimbursements paid out. [http://raportit.kela.fi/ibi\\_apps/WFServlet](http://raportit.kela.fi/ibi_apps/WFServlet) (accessed 8 Jun 2018).
2. Reho T, Atkins S, Talola N, Viljamaa M, Sumanen M, Uitti J. Frequent attenders in occupational health primary care: A cross-sectional study. *Scand J Public Health* 2018;1:1403494818777436.
3. Kimanen A, Rautio M, Manninen P, Räsänen K, Husman P, Husman K. Primary care visits to occupational health physicians and nurses in Finland. *Scand J Public Health* 2011;39:525-32.
4. Lahelma E, Aittomäki A, Laaksonen M, Lallukka T, Martikainen P, Piha K, et al. Cohort Profile: The Helsinki Health Study. *Int J Epidemiol* 2013;42:722–30.
5. Sumanen H, Pietiläinen O, Lahti J, Lahelma E, Rahkonen O. Sickness absence among young employees: trends from 2002 to 2013. *J Occup Health* 2015;57:474-81.

- 1  
2  
3 6. Sumanen H, Lahelma E, Lahti J, Pietiläinen O, Rahkonen O. Educational differences in sickness  
4 absence trends among young employees from 2002 to 2013 in Helsinki, Finland. *BMJ Open* 2016;  
5 6:e008550.  
6  
7
- 8  
9  
10 7. Sumanen H, Lahelma E, Pietiläinen O, Rahkonen O. The Magnitude of Occupational Class  
11 Differences in Sickness Absence: 15-Year Trends among Young and Middle-Aged Municipal  
12 Employees. *Int J Environ Res Public Health* 2017;14:E625.  
13  
14
- 15  
16  
17 8. AAOHN. Case Management: The Occupational and Environmental Health Nurse Role.  
18  
19  
20  
21  
22  
23  
24 9. Robinson M, Fisher TF, Broussard K. Role of Occupational Therapy in Case Management and  
25 Care Coordination for Clients With Complex Conditions. *Am J Occup Ther*  
26  
27  
28 2016;70:7002090010p1-7002090010p6.  
29  
30
- 31  
32  
33 10. Piha K, Laaksonen M, Martikainen P, Rahkonen O, Lahelma E. Interrelationships between  
34 education, occupational class, income and sickness absence. *Eur J Public Health* 2010;20:276-80.  
35
- 36  
37  
38 11. Piha K, Martikainen P, Rahkonen O, Roos E, Lahelma E. Trends in socioeconomic differences  
39 in sickness absence among Finnish municipal employees 1990-99. *Scand J Public Health*  
40  
41 2007;35:348-55.  
42  
43
- 44  
45  
46 12. Laaksonen M, Piha K, Rahkonen O, Martikainen P, Lahelma E. Explaining occupational class  
47 differences in sickness absence: Results from middle-aged municipal employees. *J Epidemiol*  
48  
49  
50  
51  
52  
53  
54  
55  
56  
57  
58  
59  
60
13. Sumanen H, Pietiläinen O, Lahti J, Lahelma E, Rahkonen O. Interrelationships between  
education, occupational class and income as determinants of sickness absence among young  
employees in 2002-2007 and 2008-2013. *BMC Public Health* 2015;15:332.

- 1  
2  
3 14. Pekkala J, Blomgren J, Pietiläinen O, Lahelma E, Rahkonen O. Occupational class differences  
4  
5 in diagnostic-specific sickness absence: A register-based study in the Finnish population. BMC  
6  
7 Public Health 2017;17:670.  
8  
9
- 10 15. Feeney A, North F, Head J, Canner R, Marmot M. Socioeconomic and sex differentials in  
11  
12 reason for sickness absence from the Whitehall II study. *Occup Environ Med* 1998;55:91-8.  
13  
14
- 15 16. Christensen K, Labriola M, Lund T, Kivimäki M. Explaining the social gradient in long-term  
16  
17 sickness absence: A prospective study of Danish employees. *J Epidemiol Community Health*  
18  
19 2008;62:181-3.  
20  
21  
22
- 23 17. Hansen H, Ingebrigtsen T. Social class and sickness absence in Norway. *Acta Sociologica*  
24  
25 2008;51:309-27.  
26  
27
- 28 18. Löve J, Hensing G, Holmgren K, Toren K. Explaining the social gradient in sickness absence: A  
29  
30 study of a general working population in Sweden. *BMC Public Health* 2013;13:545-2458-13-545.  
31  
32  
33
- 34 19. Vahtera J, Virtanen P, Kivimäki M, Pentti J. Workplace as an origin of health inequalities. *J*  
35  
36 *Epidemiol Community Health* 1999;53:399-407.  
37  
38
- 39 20. Morikawa Y, Martikainen P, Head J, Marmot M, Ishizaki M, Nakagawa H. A comparison of  
40  
41 socio-economic differences in long-term sickness absence in a Japanese cohort and a British cohort  
42  
43 of employed men. *Eur J Public Health* 2004;14:413-6.  
44  
45  
46
- 47 21. Kaikkonen R, Härkänen T, Rahkonen O, Gould R, Koskinen S. Explaining educational  
48  
49 differences in sickness absence: a population-based follow-up study. *Scand J Work Environ Health*  
50  
51 2015;41:338-46.  
52  
53
- 54 22. Jones BL, Nagin DS. 2012. A Stata Plugin for Estimating Group-Based Trajectory Models.  
55  
56 [https://ssrc.indiana.edu/doc/wimdocs/2013-03-29\\_nagin\\_trajectory\\_stata-plugin-info.pdf](https://ssrc.indiana.edu/doc/wimdocs/2013-03-29_nagin_trajectory_stata-plugin-info.pdf) (accessed  
57  
58 1 Jun 2018)  
59  
60

- 1  
2  
3 23. Nagin D. 2005. *Group-Based Modeling of Development*. Cambridge, Mass: Harvard University  
4  
5 Press.  
6  
7
- 8 24. Nagin DS, Odgers CL. Group-Based Trajectory Modeling in Clinical Research. *Annu Rev Clin*  
9  
10 *Psychol* 2010;6:109–38.  
11  
12
- 13 25. Bergh H, Baigi A, Månsson J, Mattsson B, Marklund B. Predictive factors for long-term sick  
14  
15 leave and disability pension among frequent and normal attenders in primary health care over 5  
16  
17 years. *Public Health* 2007;121:25-33.  
18  
19
- 20 26. Nieuwenhuijsen K, Verbeek JH, de Boer AG, Blonk RW, van Dijk FJ: Predicting the duration  
21  
22 of sickness absence for patients with common mental disorders in occupational health care. *Scand J*  
23  
24 *Work Environ Health* 2006;32:67-74.  
25  
26
- 27 27. Golden R. The importance of collaboration. *CMSA Today* 2015;4:21-2.  
28  
29
- 30 28. Vedsted P, Christensen MB. Frequent attenders in general practice care: a literature review with  
31  
32 special reference to methodological considerations. *Public Health* 2005;119:118-37.  
33  
34
- 35 29. Smits FT, Brouwer HJ, Schene AH, van Weert HC, Ter Riet G. Is frequent attendance of longer  
36  
37 duration related to less transient episodes of care? A retrospective analysis of transient and chronic  
38  
39 episodes of care. *BMJ Open* 2016;6:e012563.  
40  
41
- 42 30. Smits FT, Brouwer HJ, ter Riet G, van Weert HC. Epidemiology of frequent attenders: a 3-year  
43  
44 historic cohort study comparing attendance, morbidity and prescriptions of one-year and persistent  
45  
46 frequent attenders. *BMC Public Health* 2009;9;36.  
47  
48
- 49 31. Bergh H, Marklund B. Characteristics of frequent attenders in different age and sex groups in  
50  
51 primary health care. *Scand J Prim Health Care* 2003;21:171-7.  
52  
53
- 54 32. Bergh H, Baigi A, Fridlund B, Marklund B. Life events, social support and sense of coherence  
55  
56 among frequent attenders in primary health care. *Public Health* 2006;120:229-36.  
57  
58  
59  
60

- 1  
2  
3 33. Smits FT, Brouwer HJ, Zwinderman AH, Mohrs J, Schene AH, van Weert HC, ter Riet G. Why  
4 do they keep coming back? Psychosocial etiology of persistence of frequent attendance in primary  
5 care: a prospective cohort study. *J Psychosom Res* 2014;77:492-503.  
6  
7  
8  
9  
10 34. Smits FT, Brouwer HJ, van Weert HC, Schene AH, ter Riet G. Predictability of persistent  
11 frequent attendance: a historic 3-year cohort study. *Br J Gen Pract* 2009;59:e44-50.  
12  
13  
14  
15 35. Smits FT, Mohrs JJ, Beem EE, Bindels PJ, van Weert HC. Defining frequent attendance in  
16 general practice. *BMC Fam Pract*.2008;15:21.  
17  
18  
19  
20  
21 36. Bauer DJ, Curran PJ. Distributional Assumptions of Growth Mixture Models: Implications for  
22 Overextraction of Latent Trajectory Classes. *Psychological Methods* 2003;8:338-63.  
23  
24  
25  
26  
27  
28  
29  
30  
31  
32  
33  
34  
35  
36  
37  
38  
39  
40  
41  
42  
43  
44  
45  
46  
47  
48  
49  
50  
51  
52  
53  
54  
55  
56  
57  
58  
59  
60

Table 1. Descriptive statistics of the four occupational classes among 2,678 male The City of Helsinki employees aged 20-34 years. Results are based on register data covering the years from 2004 to 2017.

|                                                    | Total           |           |              |              | Occupational class                   |           |                                |           |                                        |           |                       |           |
|----------------------------------------------------|-----------------|-----------|--------------|--------------|--------------------------------------|-----------|--------------------------------|-----------|----------------------------------------|-----------|-----------------------|-----------|
|                                                    | OHS visits p.a. |           | 1 / 1<br>000 |              | <i>Managers or<br/>professionals</i> |           | <i>Semi-<br/>professionals</i> |           | <i>Routine non-<br/>manual workers</i> |           | <i>Manual workers</i> |           |
|                                                    | N               | % / (sd.) | N            | 1 / 1<br>000 | n                                    | % / (sd.) | n                              | % / (sd.) | n                                      | % / (sd.) | n                     | % / (sd.) |
| <b>Total</b>                                       | 2454            | 100.0     | 2528         | 1030.3       | 594                                  | 100.0     | 286                            | 100.0     | 677                                    | 100.0     | 897                   | 100.0     |
| The length of the follow-up in days, average (sd.) | 1341            | (252)     |              |              | 1371                                 | (204)     | 1382                           | (191)     | 1290                                   | (292)     | 1348                  | (260)     |
| OHS visits per annum, 1 / 1000 (sd.)               | 1030.3          | (1435.3)  |              |              | 705.4                                | (939.4)   | 996.5                          | (1151.3)  | 1121.5                                 | (1482.1)  | 1187.3                | (1695.8)  |
| <b>Outcome: Trajectory group</b>                   |                 |           |              |              |                                      |           |                                |           |                                        |           |                       |           |
| 1. No OHS visits                                   | 1337            | 54.5      | 225          | 168.5        | 374                                  | 63.0      | 148                            | 51.7      | 349                                    | 51.6      | 466                   | 52.0      |
| 2. Low/increasing                                  | 420             | 17.1      | 626          | 1489.3       | 91                                   | 15.3      | 54                             | 18.9      | 131                                    | 19.4      | 144                   | 16.1      |
| 3. Low/decreasing                                  | 496             | 20.2      | 728          | 1468.2       | 113                                  | 19.0      | 63                             | 22.0      | 138                                    | 20.4      | 182                   | 20.3      |
| 4. High/recurrent                                  | 201             | 8.2       | 949          | 4722.6       | 16                                   | 2.7       | 21                             | 7.3       | 59                                     | 8.7       | 105                   | 11.7      |
| <b>Covariates</b>                                  |                 |           |              |              |                                      |           |                                |           |                                        |           |                       |           |
| <b>Age (years)</b>                                 |                 |           |              |              |                                      |           |                                |           |                                        |           |                       |           |
| 20 - 24                                            | 618             | 25.2      | 684          | 1107.2       | 23                                   | 3.9       | 38                             | 13.3      | 221                                    | 32.6      | 336                   | 37.5      |
| 25 - 29                                            | 1077            | 43.9      | 996          | 924.6        | 299                                  | 50.3      | 152                            | 53.1      | 296                                    | 43.7      | 330                   | 36.8      |
| 30 - 34                                            | 759             | 30.9      | 848          | 1117.6       | 272                                  | 45.8      | 96                             | 33.6      | 160                                    | 23.6      | 231                   | 25.8      |
| <b>First language</b>                              |                 |           |              |              |                                      |           |                                |           |                                        |           |                       |           |
| Finnish                                            | 2154            | 87.8      | 2219         | 1029.9       | 499                                  | 84.0      | 272                            | 95.1      | 589                                    | 87.0      | 794                   | 88.5      |

|                                   |      |      |      |        |     |      |     |      |     |      |     |      |
|-----------------------------------|------|------|------|--------|-----|------|-----|------|-----|------|-----|------|
| Swedish                           | 81   | 3.3  | 36   | 438.3  | 47  | 7.9  | 2   | 0.7  | 24  | 3.5  | 8   | 0.9  |
| Other                             | 193  | 7.9  | 256  | 1327.7 | 24  | 4.0  | 12  | 4.2  | 62  | 9.2  | 95  | 10.6 |
| <b>Education</b>                  |      |      |      |        |     |      |     |      |     |      |     |      |
| Basic education / Lower secondary | 1595 | 65.0 | 1807 | 1132.8 | 136 | 22.9 | 115 | 40.2 | 530 | 78.3 | 814 | 90.7 |
| Upper secondary                   | 476  | 19.4 | 453  | 951.2  | 126 | 21.2 | 149 | 52.1 | 130 | 19.2 | 71  | 7.9  |
| Higher education                  | 383  | 15.6 | 269  | 701.7  | 332 | 55.9 | 22  | 7.7  | 17  | 2.5  | 12  | 1.3  |

Table 2. Descriptive statistics of the four occupational classes among 7,386 female The City of Helsinki employees aged 20-34 years. Results are based on register data covering the years from 2004 to 2017.

|                                                    | Total           |           |           |           | Occupational class               |           |                           |           |                                   |           |                       |           |
|----------------------------------------------------|-----------------|-----------|-----------|-----------|----------------------------------|-----------|---------------------------|-----------|-----------------------------------|-----------|-----------------------|-----------|
|                                                    | OHS visits p.a. |           | 1 / 1 000 |           | <i>Managers or professionals</i> |           | <i>Semi-professionals</i> |           | <i>Routine non-manual workers</i> |           | <i>Manual workers</i> |           |
|                                                    | N               | % / (sd.) | N         | 1 / 1 000 | n                                | % / (sd.) | n                         | % / (sd.) | n                                 | % / (sd.) | n                     | % / (sd.) |
| <b>Total</b>                                       | 7308            | 100.0     | 8470      | 1158.9    | 1678                             | 100.0     | 1538                      | 100.0     | 3387                              | 100.0     | 705                   | 100.0     |
| The length of the follow-up in days, average (sd.) | 1328            | (254)     |           |           | 1326                             | (244)     | 1375                      | (202)     | 1310                              | (272)     | 1322                  | (281)     |
| OHS visits per annum, 1 / 1000 (sd.)               | 1158.9          | (1499.2)  |           |           | 850.9                            | (1114.0)  | 1141.7                    | (1357.4)  | 1268.7                            | (1627.4)  | 1402.5                | (1808.0)  |
| <b>Outcome: Trajectory group</b>                   |                 |           |           |           |                                  |           |                           |           |                                   |           |                       |           |
| 1. No OHS visits                                   | 3623            | 49.6      | 644       | 177.7     | 972                              | 57.9      | 734                       | 47.7      | 1599                              | 47.2      | 318                   | 45.1      |
| 2. Low/increasing                                  | 1281            | 17.5      | 1922      | 1500.2    | 264                              | 15.7      | 249                       | 16.2      | 627                               | 18.5      | 141                   | 20.0      |
| 3. Low/decreasing                                  | 1651            | 22.6      | 2455      | 1487.0    | 347                              | 20.7      | 397                       | 25.8      | 759                               | 22.4      | 148                   | 21.0      |



1  
2  
3  
4  
5  
6  
7  
8  
9  
10  
11  
12  
13  
14  
15  
16  
17  
18  
19  
20  
21  
22  
23  
24  
25  
26  
27  
28  
29  
30  
31  
32  
33  
34  
35  
36  
37  
38  
39  
40  
41  
42  
43  
44  
45  
46

4. High/recurrent

|     |      |      |        |    |     |     |      |     |      |    |      |
|-----|------|------|--------|----|-----|-----|------|-----|------|----|------|
| 753 | 10.3 | 3449 | 4580.3 | 95 | 5.7 | 158 | 10.3 | 402 | 11.9 | 98 | 13.9 |
|-----|------|------|--------|----|-----|-----|------|-----|------|----|------|

**Covariates**

**Age**

|         |      |      |      |        |     |      |     |      |      |      |     |      |
|---------|------|------|------|--------|-----|------|-----|------|------|------|-----|------|
| 20 - 24 | 2252 | 30.8 | 2693 | 1195.6 | 142 | 8.5  | 443 | 28.8 | 1412 | 41.7 | 255 | 36.2 |
| 25 - 29 | 3152 | 43.1 | 3565 | 1130.9 | 959 | 57.2 | 693 | 45.1 | 1233 | 36.4 | 267 | 37.9 |
| 30 - 34 | 1904 | 26.1 | 2212 | 1161.9 | 577 | 34.4 | 402 | 26.1 | 742  | 21.9 | 183 | 26.0 |

**Language**

|         |      |      |      |        |      |      |      |      |      |      |     |      |
|---------|------|------|------|--------|------|------|------|------|------|------|-----|------|
| Finnish | 6451 | 88.3 | 7627 | 1182.3 | 1403 | 83.6 | 1422 | 92.5 | 3020 | 89.2 | 606 | 86.0 |
| Swedish | 324  | 4.4  | 307  | 947.5  | 158  | 9.4  | 51   | 3.3  | 109  | 3.2  | 6   | 0.9  |
| Other   | 448  | 6.1  | 479  | 1068.6 | 40   | 2.4  | 64   | 4.2  | 252  | 7.4  | 92  | 13.0 |

**Education**

|                                   |      |      |      |        |      |      |      |      |      |      |     |      |
|-----------------------------------|------|------|------|--------|------|------|------|------|------|------|-----|------|
| Basic education / Lower secondary | 3641 | 49.8 | 4667 | 1281.8 | 273  | 16.3 | 232  | 15.1 | 2541 | 75.0 | 595 | 84.4 |
| Upper secondary                   | 2319 | 31.7 | 2565 | 1105.9 | 270  | 16.1 | 1211 | 78.7 | 755  | 22.3 | 83  | 11.8 |
| Higher education                  | 1348 | 18.4 | 1238 | 918.4  | 1135 | 67.6 | 95   | 6.2  | 91   | 2.7  | 27  | 3.8  |

Table 3. Multinomial logistic regression on occupational class as a determinant of occupational health service (OHS) trajectories among 10,064 City of Helsinki employees aged 20-34 years. Results are based on register data covering the years from 2004 to 2017.

| Trajectory                 | OHS trajectory comparison        |                    |
|----------------------------|----------------------------------|--------------------|
|                            | Low/increasing vs. No OHS visits |                    |
|                            | Model 1*                         | Model 2**          |
| <b>Men</b>                 |                                  |                    |
| Managers or professionals  | 1.00                             | 1.00               |
| Semi-professionals         | 1.55 (1.04 - 2.31)               | 1.31 (0.85 - 2.03) |
| Routine non-manual workers | 1.71 (1.24 - 2.37)               | 1.40 (0.96 - 2.06) |
| Manual workers             | 1.38 (1.00 - 1.90)               | 1.12 (0.76 - 1.66) |
| <b>Women</b>               |                                  |                    |
| Managers or professionals  | 1.00                             | 1.00               |
| Semi-professionals         | 1.25 (1.02 - 1.54)               | 1.19 (0.92 - 1.53) |
| Routine non-manual workers | 1.47 (1.24 - 1.76)               | 1.40 (1.11 - 1.76) |
| Manual workers             | 1.64 (1.28 - 2.11)               | 1.55 (1.16 - 2.08) |
| Trajectory                 | Low/decreasing vs. No OHS visits |                    |
|                            | Model 1*                         | Model 2**          |
| <b>Men</b>                 |                                  |                    |
| Managers or professionals  | 1.00                             | 1.00               |
| Semi-professionals         | 1.32 (0.91 - 1.91)               | 1.45 (0.96 - 2.19) |
| Routine non-manual workers | 1.31 (0.97 - 1.77)               | 1.53 (1.05 - 2.22) |
| Manual workers             | 1.26 (0.94 - 1.68)               | 1.50 (1.04 - 2.18) |
| <b>Women</b>               |                                  |                    |
| Managers or professionals  | 1.00                             | 1.00               |
| Semi-professionals         | 1.48 (1.24 - 1.77)               | 1.71 (1.36 - 2.15) |
| Routine non-manual workers | 1.33 (1.13 - 1.56)               | 1.67 (1.34 - 2.07) |

1  
2  
3  
4  
5  
6  
7  
8  
9  
10  
11  
12  
13  
14  
15  
16  
17  
18  
19  
20  
21  
22  
23  
24  
25  
26  
27  
28  
29  
30  
31  
32  
33  
34  
35  
36  
37  
38  
39  
40  
41  
42  
43  
44  
45  
46  
47  
48  
49  
50  
51  
52  
53  
54  
55  
56  
57  
58  
59  
60

|                |                    |                    |
|----------------|--------------------|--------------------|
| Manual workers | 1.30 (1.02 - 1.65) | 1.65 (1.25 - 2.19) |
|----------------|--------------------|--------------------|

**Trajectory**

High/recurrent vs. No OHS visits

Model 1\*

Model 2\*\*

**Men**

|                            |                    |                    |
|----------------------------|--------------------|--------------------|
| Managers or professionals  | 1.00               | 1.00               |
| Semi-professionals         | 3.21 (1.62 - 6.36) | 2.60 (1.23 - 5.49) |
| Routine non-manual workers | 3.99 (2.22 - 7.17) | 2.92 (1.48 - 5.74) |
| Manual workers             | 5.02 (2.86 - 8.80) | 3.56 (1.83 - 6.92) |

**Women**

|                            |                    |                    |
|----------------------------|--------------------|--------------------|
| Managers or professionals  | 1.00               | 1.00               |
| Semi-professionals         | 2.13 (1.61 - 2.81) | 2.29 (1.62 - 3.24) |
| Routine non-manual workers | 2.53 (1.98 - 3.25) | 2.28 (1.65 - 3.15) |
| Manual workers             | 3.10 (2.25 - 4.27) | 2.71 (1.85 - 3.97) |

Model 1\* = Model adjusted for age and first language, Model 2\*\* = M1 + education

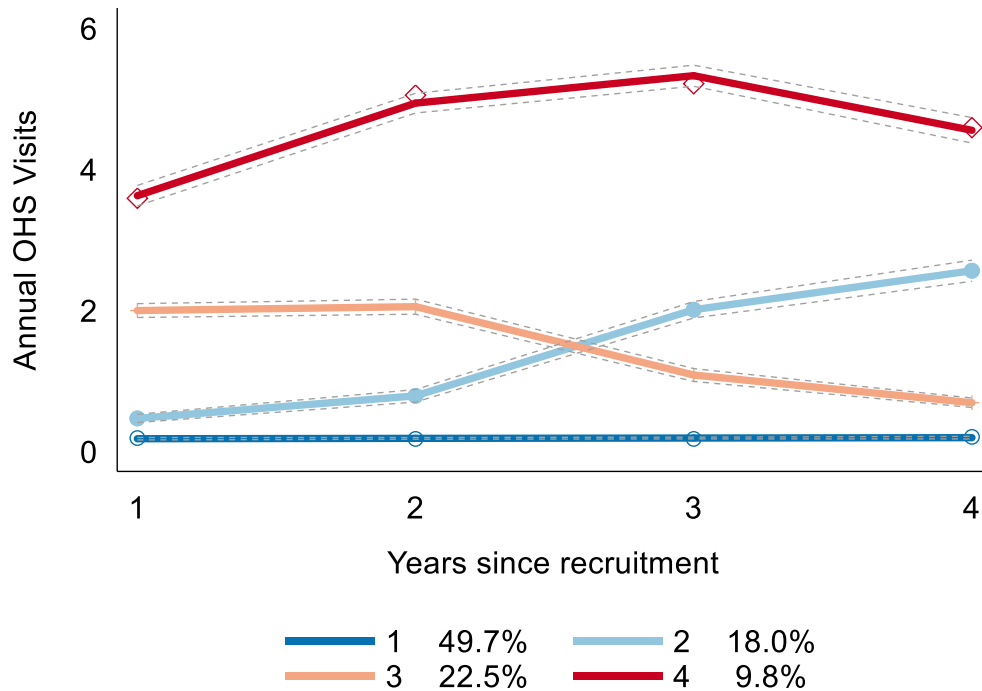

Figure 1. Four occupational health service trajectories, based on registers covering the years 2004 to 2017 among 10,064 the City of Helsinki employees aged 20-34 years. 1 = No visits, 2 = Low/decreasing, 3 = Low/increasing, 4 = High/recurrent use.

## STROBE Statement—checklist of items that should be included in reports of observational studies

## Young Employees' Trajectories and Occupational Class Differences in Utilization of Primary Care Services Provided by Occupational Health Service

Hilla Sumanen, PhD

Jaakko Harkko, PhD

Kustaa Piha, PhD

Olli Pietiläinen, MSc

Ossi Rahkonen, Professor

Anne Kouvonen, Professor

|                           | Item No | Recommendation                                                                                                                                                                                                                                                                                                                                                                                                                                                         | Done, page |
|---------------------------|---------|------------------------------------------------------------------------------------------------------------------------------------------------------------------------------------------------------------------------------------------------------------------------------------------------------------------------------------------------------------------------------------------------------------------------------------------------------------------------|------------|
| <b>Title and abstract</b> | 1       | (a) Indicate the study's design with a commonly used term in the title or the abstract                                                                                                                                                                                                                                                                                                                                                                                 | 3          |
|                           |         | (b) Provide in the abstract an informative and balanced summary of what was done and what was found                                                                                                                                                                                                                                                                                                                                                                    | 3          |
| <b>Introduction</b>       |         |                                                                                                                                                                                                                                                                                                                                                                                                                                                                        |            |
| Background/rationale      | 2       | Explain the scientific background and rationale for the investigation being reported                                                                                                                                                                                                                                                                                                                                                                                   | 4-5        |
| Objectives                | 3       | State specific objectives, including any prespecified hypotheses                                                                                                                                                                                                                                                                                                                                                                                                       | 5          |
| <b>Methods</b>            |         |                                                                                                                                                                                                                                                                                                                                                                                                                                                                        |            |
| Study design              | 4       | Present key elements of study design early in the paper                                                                                                                                                                                                                                                                                                                                                                                                                | 5          |
| Setting                   | 5       | Describe the setting, locations, and relevant dates, including periods of recruitment, exposure, follow-up, and data collection                                                                                                                                                                                                                                                                                                                                        | 5-6        |
| Participants              | 6       | (a) <i>Cohort study</i> —Give the eligibility criteria, and the sources and methods of selection of participants. Describe methods of follow-up<br><i>Case-control study</i> —Give the eligibility criteria, and the sources and methods of case ascertainment and control selection. Give the rationale for the choice of cases and controls<br><i>Cross-sectional study</i> —Give the eligibility criteria, and the sources and methods of selection of participants | 5-6        |
|                           |         | (b) <i>Cohort study</i> —For matched studies, give matching criteria and number of exposed and unexposed<br><i>Case-control study</i> —For matched studies, give matching criteria and the number of controls per case                                                                                                                                                                                                                                                 |            |
| Variables                 | 7       | Clearly define all outcomes, exposures, predictors, potential confounders, and effect modifiers. Give diagnostic criteria, if applicable                                                                                                                                                                                                                                                                                                                               | 6-7        |
| Data sources/measurement  | 8*      | For each variable of interest, give sources of data and details of methods of assessment (measurement). Describe comparability of assessment methods if there is more than one group                                                                                                                                                                                                                                                                                   | 6          |
| Bias                      | 9       | Describe any efforts to address potential sources of bias                                                                                                                                                                                                                                                                                                                                                                                                              | 7, 14-     |

|                        |    |                                                                                                                                                                                                                                                                                                           |     |
|------------------------|----|-----------------------------------------------------------------------------------------------------------------------------------------------------------------------------------------------------------------------------------------------------------------------------------------------------------|-----|
|                        |    |                                                                                                                                                                                                                                                                                                           | 15  |
| Study size             | 10 | Explain how the study size was arrived at                                                                                                                                                                                                                                                                 | 5-6 |
| Quantitative variables | 11 | Explain how quantitative variables were handled in the analyses. If applicable, describe which groupings were chosen and why                                                                                                                                                                              | 7   |
| Statistical methods    | 12 | (a) Describe all statistical methods, including those used to control for confounding                                                                                                                                                                                                                     | 7   |
|                        |    | (b) Describe any methods used to examine subgroups and interactions                                                                                                                                                                                                                                       | 7   |
|                        |    | (c) Explain how missing data were addressed                                                                                                                                                                                                                                                               |     |
|                        |    | (d) <i>Cohort study</i> —If applicable, explain how loss to follow-up was addressed<br><i>Case-control study</i> —If applicable, explain how matching of cases and controls was addressed<br><i>Cross-sectional study</i> —If applicable, describe analytical methods taking account of sampling strategy |     |
|                        |    | (e) Describe any sensitivity analyses                                                                                                                                                                                                                                                                     | 10  |

| <b>Results</b>           |     |                                                                                                                                                                                                              | <b>Done, page</b> |
|--------------------------|-----|--------------------------------------------------------------------------------------------------------------------------------------------------------------------------------------------------------------|-------------------|
| Participants             | 13* | (a) Report numbers of individuals at each stage of study—eg numbers potentially eligible, examined for eligibility, confirmed eligible, included in the study, completing follow-up, and analysed            | 5-8               |
|                          |     | (b) Give reasons for non-participation at each stage                                                                                                                                                         |                   |
|                          |     | (c) Consider use of a flow diagram                                                                                                                                                                           |                   |
| Descriptive data         | 14* | (a) Give characteristics of study participants (eg demographic, clinical, social) and information on exposures and potential confounders                                                                     | 7-8               |
|                          |     | (b) Indicate number of participants with missing data for each variable of interest                                                                                                                          |                   |
|                          |     | (c) <i>Cohort study</i> —Summarise follow-up time (eg, average and total amount)                                                                                                                             |                   |
| Outcome data             | 15* | <i>Cohort study</i> —Report numbers of outcome events or summary measures over time                                                                                                                          | 6, 8              |
|                          |     | <i>Case-control study</i> —Report numbers in each exposure category, or summary measures of exposure                                                                                                         |                   |
|                          |     | <i>Cross-sectional study</i> —Report numbers of outcome events or summary measures                                                                                                                           |                   |
| Main results             | 16  | (a) Give unadjusted estimates and, if applicable, confounder-adjusted estimates and their precision (eg, 95% confidence interval). Make clear which confounders were adjusted for and why they were included | 7-10              |
|                          |     | (b) Report category boundaries when continuous variables were categorized                                                                                                                                    |                   |
|                          |     | (c) If relevant, consider translating estimates of relative risk into absolute risk for a meaningful time period                                                                                             |                   |
| Other analyses           | 17  | Report other analyses done—eg analyses of subgroups and interactions, and sensitivity analyses                                                                                                               | 10                |
| <b>Discussion</b>        |     |                                                                                                                                                                                                              |                   |
| Key results              | 18  | Summarise key results with reference to study objectives                                                                                                                                                     | 10-11             |
| Limitations              | 19  | Discuss limitations of the study, taking into account sources of potential bias or imprecision. Discuss both direction and magnitude of any potential bias                                                   | 14-15             |
| Interpretation           | 20  | Give a cautious overall interpretation of results considering objectives, limitations, multiplicity of analyses, results from similar studies, and other relevant evidence                                   | 10-15             |
| Generalisability         | 21  | Discuss the generalisability (external validity) of the study results                                                                                                                                        | 10-15             |
| <b>Other information</b> |     |                                                                                                                                                                                                              |                   |

|         |    |                                                                                                                                                               |    |
|---------|----|---------------------------------------------------------------------------------------------------------------------------------------------------------------|----|
| Funding | 22 | Give the source of funding and the role of the funders for the present study and, if applicable, for the original study on which the present article is based | 16 |
|---------|----|---------------------------------------------------------------------------------------------------------------------------------------------------------------|----|

\*Give information separately for cases and controls in case-control studies and, if applicable, for exposed and unexposed groups in cohort and cross-sectional studies.

**Note:** An Explanation and Elaboration article discusses each checklist item and gives methodological background and published examples of transparent reporting. The STROBE checklist is best used in conjunction with this article (freely available on the Web sites of PLoS Medicine at <http://www.plosmedicine.org/>, Annals of Internal Medicine at <http://www.annals.org/>, and Epidemiology at <http://www.epidem.com/>). Information on the STROBE Initiative is available at [www.strobe-statement.org](http://www.strobe-statement.org).

For peer review only

# BMJ Open

## Does occupational class explain occupational health service utilization trajectories identified by group-based trajectory analysis among young municipal employees in Finland?

|                                 |                                                                                                                                                                                                                                                                                                                                                                                                                                                                                                                 |
|---------------------------------|-----------------------------------------------------------------------------------------------------------------------------------------------------------------------------------------------------------------------------------------------------------------------------------------------------------------------------------------------------------------------------------------------------------------------------------------------------------------------------------------------------------------|
| Journal:                        | <i>BMJ Open</i>                                                                                                                                                                                                                                                                                                                                                                                                                                                                                                 |
| Manuscript ID                   | bmjopen-2018-028742.R1                                                                                                                                                                                                                                                                                                                                                                                                                                                                                          |
| Article Type:                   | Original research                                                                                                                                                                                                                                                                                                                                                                                                                                                                                               |
| Date Submitted by the Author:   | 14-Aug-2019                                                                                                                                                                                                                                                                                                                                                                                                                                                                                                     |
| Complete List of Authors:       | Sumanen, Hilla; South-Eastern Finland University of Applied Sciences, Health care and emergency care; University of Helsinki, Public Health<br>Harkko, Jaakko; University of Helsinki, Social Sciences<br>Piha, Kustaa ; University of Helsinki, Public Health<br>Pietilainen, Olli; University of Helsinki, Department of Public Health<br>Rahkonen, Ossi; University of Helsinki, Department of Public Health<br>Kouvonen, Anne; Helsingin Yliopisto, Faculty of Social Sciences; Queen's University Belfast, |
| <b>Primary Subject Heading</b>: | Health services research                                                                                                                                                                                                                                                                                                                                                                                                                                                                                        |
| Secondary Subject Heading:      | Occupational and environmental medicine                                                                                                                                                                                                                                                                                                                                                                                                                                                                         |
| Keywords:                       | health care visits, socioeconomic differences, young adults                                                                                                                                                                                                                                                                                                                                                                                                                                                     |
|                                 |                                                                                                                                                                                                                                                                                                                                                                                                                                                                                                                 |

SCHOLARONE™  
Manuscripts



1  
2  
3  
4  
5  
6  
7  
8  
9  
10  
11  
12  
13  
14  
15  
16  
17  
18  
19  
20  
21  
22  
23  
24  
25  
26  
27  
28  
29  
30  
31  
32  
33  
34  
35  
36  
37  
38  
39  
40  
41  
42  
43  
44  
45  
46  
47  
48  
49  
50  
51  
52  
53  
54  
55  
56  
57  
58  
59  
60

Does occupational class explain occupational health service utilization trajectories identified by group-based trajectory analysis among young municipal employees in Finland?

Hilla Sumanen, PhD 1,2,3

Jaakko Harkko, PhD 3

Kustaa Piha, MD, PhD 2

Olli Pietiläinen, MSc 2

Ossi Rahkonen, Professor 2

Anne Kouvonen, Professor 3, 4, 5

1. South-Eastern Finland University of Applied Sciences, Unit of Healthcare and Emergency care and Unit of Research, Development and Innovation
2. University of Helsinki, Faculty of Medicine, Department of Public Health
3. University of Helsinki, Faculty of Social Sciences
4. Research Institute of Psychology, SWPS University of Social Sciences and Humanities
5. Queen's University Belfast, Administrative Data Research Centre – Northern Ireland, Centre for Public Health

Correspondence to: Hilla Sumanen, Department of Public Health, University of Helsinki, Finland, P.O. Box 20 (Tukholmankatu 8B), FIN-00014, University of Helsinki, Finland;  
[hilla.sumanen@helsinki.fi](mailto:hilla.sumanen@helsinki.fi)

### **What is already known about this subject?**

This is the first study utilizing longitudinal occupational health service data. All the findings are novel.

### **What are the new findings?**

We identified four occupational health service utilization groups among young employees: “No visits” (50%), “Low/increasing” (18%), “Low/decreasing” (22%) and “High/recurrent” (10%) use. Lower occupational classes had a higher propensity for “High/recurrent” OHS utilization for both genders.

### **How might this impact on policy or clinical practice in the foreseeable future?**

Preventive measures should be targeted particularly to the trajectory groups of “Low/increasing” and “High/recurrent” in order to intervene early. Occupational health service utilization should be more closely monitored among the two lowest occupational classes.

Running head: Young Employees’ Utilization of Occupational Health Service

## Abstract

**OBJECTIVES:** To identify groups of municipal employees between the ages of 20 and 34 years with distinct utilization trajectories of primary care services provided by occupational health service (OHS), measured as the annual number of OHS visits, and to identify demographic and socio-economic risk factors that distinguish employees in the high utilization trajectory group(s).

**METHODS:** The present study is a retrospective register-based cohort study. All municipal employees of the City of Helsinki, Finland, aged 20-34 in the Helsinki Health Study (HHS), recruited from 2004 to 2013, with follow-up data for four years were included in the study (n = 9762). The outcome measure was group-based trajectories of OHS utilization, identified with a group-based trajectory analysis (GBTA). The demographic and socio-economic variables used to predict the outcome were age, first language, educational level and occupational class. The analyses were stratified by gender.

**RESULTS:** A large proportion of the young employees do not utilize OHS. Trajectory groups of "No visits" (50%), "Low/increasing" (18%), "Low/decreasing" (22%) and "High/recurrent" (10%) use were identified. We found occupational class differences in OHS utilization patterns showing that lower occupational classes had a higher propensity for "High/recurrent" OHS utilization for both genders.

**CONCLUSIONS:** Preventive measures should be targeted particularly to the trajectory groups of "Low/increasing" and "High/recurrent" in order to intervene early. In addition, OHS utilization should be closely monitored among the two lowest occupational classes. More research with longitudinal OHS data is needed.

**Key terms:** Health care visits, Socioeconomic differences, Young adults, Women, Men

### Strengths and limitations of this study

- This is the first study utilizing longitudinal occupational health service data
- The sample consisted all of 20-34-year-old employees of the City of Helsinki. The occupational health care policies are same for all these employees and have remained same during the study period of 2004-2017.
- Our study avoids a common limitation of previous occupational health service studies that are based on limited samples with data on only those attending the service or those responding to survey.
- Limitations of the data include the lack of diagnostic information and lifestyle factors.
- The lack of information about other primary care visits outside the occupational health service further limits the interpretation of the results.

## Introduction

Finland has a unique occupational health service (OHS) system with statutory prevention of occupational health hazards (preventive services) and additionally purchased primary care services. OHS may be provided by employer's own OHS units, private clinics or public sector health centers with specifically trained occupational health physicians, nurses, physiotherapists and psychologists. In Finland, most employers purchase the additional primary care element for their employees. In 2017, 94% of the employees covered by statutory preventive OHS also had an access to primary care for any illness including all non-work related illnesses, paid by their employer and partly subsidized by the National Pension Fund [1]. OHSs are free for employees at the point of delivery and their accessibility is typically good, making them the main source and the preferred type of primary care for Finnish employees.

The utilization of OHS in Finland or elsewhere has been only scarcely studied, and especially studies using longitudinal data are lacking. There are few previous Finnish studies concentrating on the OHS primary care visits with cross-sectional study designs and from the viewpoint of service utilization over the course of 6 to 12 months. A recent study [2] with data from a large private Finnish OHS provider investigated the top 10% frequent attenders in primary care services in 2015. The results showed that frequent attendance was associated with female gender, being employed by a medium or a large company, working in the manufacturing industry, public administration or in health and social care services. In an earlier study with survey data (N=1636) from the Finnish working-age population [3], 57% of Finnish employees covered by the OHS primary care visited either their occupational health physician or nurse due to any illness during the 6-month period. In that study, those visits were strongly associated with chronic illness impacting occupational health and work ability. Both previous studies utilizing Finnish OHS data acknowledge the lack of research focusing to these unique services provided for the working population and identify the need for further study to identify service development needs and possibilities.

1  
2  
3 The current study utilizes longitudinal data from the own OHS unit of Finland's largest employer.  
4  
5 The City of Helsinki offers same OHSs with primary care for all its employees (n~38 000 per  
6  
7 year) with no cost for the employees. The City of Helsinki employees have been the focus of the  
8  
9 Helsinki Health Study [4] since 2000, but this is the first study using their OHS data. Our focus is  
10  
11 on the younger employees and their OHS utilization, as previous studies have shown that they have  
12  
13 a high prevalence of sickness absence (SA) [5] and there are already large socioeconomic  
14  
15 differences in SA apparent in the younger age groups [6-7]. Reducing SA is high on employers'  
16  
17 agenda. Service utilization information is important for planning preventive actions via targeted  
18  
19 interventions or improving case management protocols [8-9] arranged by the OHS. According to  
20  
21 extensive Finnish and international evidence socioeconomic differences in SA are large among  
22  
23 employees [10-21], thus the differences in OHS utilization is feasible to monitor from the  
24  
25 socioeconomic viewpoint and to be able to identify groups for interventions.  
26  
27  
28  
29

30  
31 In our study, we aimed to identify developmental trajectories of OHS primary care service  
32  
33 utilization among 20-34-year-old municipal employees of the City of Helsinki. In the second stage  
34  
35 of the analysis we aimed to identify occupational class differences in belonging to different  
36  
37 trajectory groups. We tested two hypothesis, first, that the distinct trajectories can be identified, and  
38  
39 second, that occupational class gradient can be found in OHS utilization.  
40  
41  
42  
43  
44  
45

## 46 **Methods**

47  
48  
49 This is a retrospective register-based cohort study. The study is a part of the Helsinki Health Study  
50  
51 on health and well-being among employees of the City of Helsinki, Finland [4]. The study included  
52  
53 all Helsinki City employees aged 20-34 at the beginning of their first work contract with the City (N  
54  
55 = 22,576) between 04/06/2004 and 04/19/2013. The selection of this age group was based on the  
56  
57 Eurostat definition of young employees ,and on previous studies investigating the occurrence of  
58  
59  
60

1  
2  
3 illness and sickness absence in employees of different ages [22, 23]. For each employee the follow-  
4  
5 up started from their initial recruitment. Employees with incomplete data on occupational position  
6  
7 (n= 754) and those with employment record for less than four years (n= 12,512) were excluded  
8  
9 from the present study and we ended up with a sample size of n = 9,762. We excluded employees  
10  
11 with less than four years of employment history as we needed a long enough follow-up time to  
12  
13 observe potential development trajectories. The descriptive characteristics of excluded subjects are  
14  
15 found in web-appendixes 1 and 2. The length of the follow-up was measured as calendar days in  
16  
17 employment.  
18  
19  
20  
21

22 OHS utilization trajectory was the outcome of the study. The trajectory, i.e. the developmental  
23  
24 course of OHS utilization, was measured from four consecutive data points indicating annual  
25  
26 number of outpatient primary care visits for each employee. The number of visits ranged from 0 to  
27  
28 103. The demographic and socioeconomic variables used to predict the outcome were age, first  
29  
30 language, educational level and occupational class. The analyses were stratified by gender.  
31  
32  
33

34 We used four occupational class groups. Based on the socioeconomic classification of Statistics  
35  
36 Finland and the occupational classification of the City of Helsinki [4,12], non-manual employees  
37  
38 were divided into three groups based on skills requirements and supervisory status: Managers and  
39  
40 professionals, semi-professionals, and routine non-manual employees. Managers have subordinates  
41  
42 and they do managerial or administrative work, whereas professionals include employees with a  
43  
44 university degree, such as physicians and teachers. Semi-professionals include occupations such as  
45  
46 registered nurses and technicians. Routine non-manual employees include clerical employees and  
47  
48 lesser-educated occupations particularly within the social and health care, such as child-minders and  
49  
50 care workers. The fourth occupational class, manual workers, include occupations for example from  
51  
52 the fields of cleaning, kitchen work and public transport.  
53  
54  
55  
56

57 Age was categorized into three groups: 20-24, 25-29 and 30-34-year-olds. First language was  
58  
59 categorized as: Finnish, Swedish, Other. Education was classified into three levels: higher education  
60

1  
2  
3 (a Master's or a doctor's degree), upper secondary (a Bachelor's degree), and lower secondary  
4  
5 (upper-secondary school, vocational school) or basic education (comprehensive school).  
6  
7

8 The employer's personnel and occupational health care registers were used to obtain socio-  
9  
10 demographic characteristics and information on OHS use. Educational level was obtained from  
11  
12 annually updated Statistics Finland's registry of completed education and degrees, and was linked  
13  
14 to the City of Helsinki personnel register.  
15  
16

### 17 18 *Ethics*

19  
20  
21 The study follows the Helsinki Health Study protocol in line with the University of Helsinki's  
22  
23 guidelines and data legislation. The ethics committees of the Department of Public Health, the  
24  
25 University of Helsinki and the health authorities of the City of Helsinki have approved the HHS  
26  
27 study. The City of Helsinki has given permission for data linkage.  
28  
29  
30  
31  
32

### 33 34 *Patient and Public Involvement statement*

35  
36  
37 No Patient or Public Involvement.  
38  
39

### 40 41 *Statistical methods*

42  
43 Group-based trajectory modeling (GBTM) with Stata's *traj* command [24] was applied to identify  
44  
45 clusters of individuals, or trajectory groups, with similar developmental trajectory on OHS  
46  
47 utilization. The method assigns a subject to a trajectory group by assessing the probability of group  
48  
49 membership. The count variables were assumed to be Poisson-distributed and zero inflated Poisson  
50  
51 models were applied. The ideal number of trajectory groups and trajectory shapes were assessed by  
52  
53 four criteria suggested by the existing literature: Bayesian information criteria (BIC), posterior  
54  
55 probabilities of trajectory group membership higher than .70, sizes of trajectory groups larger than  
56  
57 5% and a distinct interpretability of the identified trajectory groups [25,26]. Subsequently,  
58  
59  
60

1  
2  
3 multinomial logistic regression models using Stata's *mlogit* command were applied to investigate  
4 the role of occupational class as a predictor of the trajectory group membership. In a two-step-  
5 analysis, estimates are given for occupational class, first, adjusted for age and first language and,  
6 second, additionally adjusted for education. The trajectory cluster indicating the lowest health care  
7 utilization was defined as the reference group in the analysis. The results are given as relative risk  
8 ratios (RRRs) with their 95% confidence intervals (CIs). All statistical analyses were performed  
9 with Stata 15.  
10  
11  
12  
13  
14  
15  
16  
17  
18  
19  
20  
21  
22

## 23 **Results**

### 24 *Descriptive results*

25  
26 The study sample included 9762 the City of Helsinki employees aged between 20 and 34 at the  
27 beginning of the follow-up. 27% of the employees were men and 73% women. Among men, the  
28 yearly average of OHS visits was 1.03 (SD, 1.44) during the mean of 1341 days of follow-up.  
29 Among women, the yearly average was 1.16 (SD, 1.50) OHS visits in the mean of 1328 days. Of  
30 the subjects of the study, 2272 (23%) were managers or professionals, 1824 (19%) semi-  
31 professionals, 4064 (42%) routine non-manual workers, and 1602 (16%) manual workers (Tables 1-  
32 2). Managers/professionals had an equal gender distribution, semi-professionals and routine non-  
33 manual workers were more often women, whereas men constituted the majority of manual workers.  
34 Occupational class was closely linked to educational attainment in both genders.  
35  
36  
37  
38  
39  
40  
41  
42  
43  
44  
45  
46  
47  
48  
49

50 In trajectory analysis, a trajectory model consisting of four distinct trajectories including 1  
51 trajectory with a linear, 1 with a quadratic, and 2 with a cubic shape showed the best fit using the  
52 BIC criterion (Figure 1). The largest identified trajectory group "No visits" (n = 5,106, 50%)  
53 represents those with less than 0.2 annual OHS visits over the four years of follow-up. There were  
54 two intermediate groups. The group labeled "Low/increasing" (n = 1,744, 18%) is characterized by  
55  
56  
57  
58  
59  
60



1  
2  
3 low number of visits during the first two years followed by a slight increase in visits during the next  
4 two years. The group “Low/decreasing” (n = 2,238, 22%) follows a similar pattern as the group 2,  
5 but in a reverse order. The members of the both low groups averaged 1.5 annual OHS visits during  
6 the follow-up. The “High/recurrent” group (n = 976, 10%) consists of employees characterized by  
7 high levels of OHS visits, with an average of 4.6 visits per year, from the start of the employment to  
8 the end of the follow-up. The mean assignment probabilities were 0.93 for the “No visits”, 0.81 for  
9 the “Low/increasing”, 0.82 for the “Low/decreasing”, and 0.92 for the “High/recurrent” trajectory  
10 groups, indicating a good model fit to the data. Of men, 54% belonged to the “No visits” trajectory  
11 and 8.4% to the “High/recurrent” trajectory group, whereas the corresponding figures for women  
12 were 50% and 10%, indicating a higher propensity for women to belong to the “High/recurrent”  
13 trajectory group. The assignment of the members of different occupational classes to different OHS  
14 trajectories followed the socio-economic gradient. Of managers or professionals, 59% belonged to  
15 the “No visits” trajectory and 5% to the “High/recurrent” trajectory. The corresponding figures for  
16 semi-professionals were 48% and 10%, for routine non-manual workers 48% and 11%, and for  
17 manual workers 49% and 13%, respectively.  
18  
19  
20  
21  
22  
23  
24  
25  
26  
27  
28  
29  
30  
31  
32  
33  
34  
35  
36  
37  
38  
39  
40

41 \*\*\* Figure 1 \*\*\*

42  
43  
44 \*\*\* Table 1 \*\*\*

45  
46  
47 \*\*\* Table 2 \*\*\*  
48  
49  
50  
51  
52

### 53 *OHS utilization trajectories by occupational class*

54  
55  
56 Occupational class was a strong independent predictor for the OHS utilization trajectories, as  
57 demonstrated in Table 3. The likelihood of belonging to the “High/recurrent” trajectory was  
58  
59  
60

1  
2  
3 increased for those being in a lower occupational class. For both women and men, the risk for  
4 belonging to the “High/recurrent” trajectory was highest for manual workers, followed by routine  
5 non-manual workers and semi-professionals.  
6  
7  
8  
9

10 The independent effect of occupational class remained after adjustment for all covariates including  
11 age, first language and education. The association was most evident in the “High/recurrent”  
12 trajectory. The relative risk for this group membership was 2.92 (95% CI, 1.48 – 5.74) for male  
13 routine non-manual workers and 3.56 (95% CI, 1.83 – 6.92) for male manual workers. The  
14 corresponding figures for women were 2.28 (95% CI, 1.65 – 3.15) and 2.71 (95% CI, 1.85 – 3.97),  
15 respectively. The results indicate that a proportion of the association between occupational class and  
16 belonging to the “High/recurrent” trajectory is dependent on the lower educational attainment of the  
17 members of the lower occupational classes. The results comparing the two low trajectories with the  
18 “No visits” OHS trajectory were less clear in terms of statistical significance. Whereas all estimates  
19 but one in “Low/decreasing” vs “No visits” comparison remained statistically significant after full  
20 adjustment, four out of “Low/increasing” vs “No visits” comparisons become statistically non-  
21 significant in the final model. The observed excess risks generated by occupational class were thus  
22 smaller in both “Low” trajectories compared to “High/recurrent” trajectory. Notably, the relative  
23 risks related to the membership of these middle trajectories were not manifested in a dose-exposure  
24 manner as was the case with the “High/recurrent” trajectory.  
25  
26  
27  
28  
29  
30  
31  
32  
33  
34  
35  
36  
37  
38  
39  
40  
41  
42  
43  
44  
45  
46  
47  
48

49 \*\*\* Table 3 \*\*\*  
50  
51  
52  
53

#### 54 *Sensitivity analyses*

55  
56  
57 To assess the extent the parameter estimates were sensitive to potential errors in model specification  
58 and data, three types of sensitivity analyses were performed. First, we reproduced estimates from  
59  
60

1  
2  
3 the original data with bootstrap resampling (1000 replications). Second, we reproduced the results  
4  
5 with logistic regression analyses defining the high-utilization group as those whose total number of  
6  
7 OHS visits during the follow-up period was 10 or more (n=1,484) was compared with those with no  
8  
9 or just one visit (n= 3,993). These sensitivity analyses indicated robustness of our inference about  
10  
11 the relationship between occupational class and OHS utilization trajectories. Third, we performed a  
12  
13 sensitivity analysis where variables on part-time work and fixed-term contract were included, but  
14  
15 they changed the estimates only modestly.  
16  
17  
18  
19  
20  
21  
22

## 23 **Discussion**

24  
25 In this study we identified developmental trajectories and socioeconomic differences in OHS  
26  
27 primary care service utilization among 20 to 34-year-old employees of the City of Helsinki from  
28  
29 2004 to 2017. Our key results were: 1) Half of the young employees did not use occupational health  
30  
31 care services to any considerable extent; 2) Higher occupational classes utilized less OHS; 3) Four  
32  
33 trajectory groups, that is, “No visits”, ”Low/increasing”, “Low/decreasing” and “High/recurrent”,  
34  
35 were identified. 4) The trajectory group of “High/recurrent” included a larger number of lower class  
36  
37 workers especially among men, and the differences were large also among women. 5) Occupational  
38  
39 class differences in “Low/decreasing” group were evident in both genders. 6) Only in women there  
40  
41 were some occupational class differences in belonging to the trajectory group of “Low-increasing  
42  
43 OHS utilization”.  
44  
45  
46  
47  
48

49 Our results highlight the significance of socioeconomic gradient in OHS utilization that was visible  
50  
51 both in men and women. The percentage of those who had no visits was the highest among  
52  
53 managers and professionals and the proportion of no visits decreased when going down the  
54  
55 occupational class ladder. Respectively, high and recurrent use was smallest among managers and  
56  
57 professionals, and increased with decreasing occupational class, this type of use being the most  
58  
59  
60

1  
2  
3 common among manual workers. A larger proportion of men had no visits at all in each  
4  
5 occupational class, thus the women used the health services more, in line with earlier findings [2].  
6  
7 In a similar way, the high and recurrent use was higher among women than among men. In the  
8  
9 present context, primary care visits can be interpreted as an indicator of incidence of acute illnesses,  
10  
11 as the Finnish OHS system distinguish visits related to occupational health hazards. The present  
12  
13 results concerning primary care visits are in line with previous findings from our own and other  
14  
15 studies showing the socioeconomic differences in sickness absence among employees and the  
16  
17 gender differences in sickness absence, i.e. women having more absence than men [7,10,14,18,21].  
18  
19 It can be assumed that large number of OHS visits precede sickness absence as also indicated by  
20  
21 Bergh et al. [27].  
22  
23  
24  
25

26  
27 Stratified analyses indicated gender differences in OHS utilization. According to our results, among  
28  
29 men the occupational class differences disappeared after full adjustment in the trajectory group of  
30  
31 “Low/increasing”. This implies that the initial differences are associated with the type of work  
32  
33 tasks. In contrast, after full adjustment, among women the employees in the two lowest  
34  
35 occupational classes had a higher risk for belonging to this trajectory group. In the trajectory group  
36  
37 of “Low/decreasing” the differences were initially similar among the three lowest occupational  
38  
39 classes. However, the differences modestly increased after full adjustment, implying that there are  
40  
41 several factors associated with the low OHS utilization. This was seen among both genders.  
42  
43  
44

45  
46 The trajectory group of “High/recurrent” is perhaps the most interesting group alongside with the  
47  
48 “Low/increasing” group in terms of costs and possible preventive opportunities. According to our  
49  
50 results the occupational class differences in this group are steep especially among men, and also  
51  
52 large among women. After full adjustment the differences decreased more in men, suggesting that  
53  
54 the initial differences are more associated with work tasks among them. However, the differences  
55  
56 remained high in both genders after adjustments. Studies regarding socioeconomic differences in  
57  
58  
59  
60

1  
2  
3 sickness absence have also found that the differences are steeper among men [7,17,18], but the  
4  
5 former studies mostly concentrate on older employees.  
6  
7

8 The differences in physical and psychosocial demands between occupational classes are important  
9  
10 to take into account when interpreting the results. Manual workers have more physically demanding  
11  
12 jobs, which may affect their need for primary care services. Adverse working conditions may cause  
13  
14 ill-health and need of health services as milder even health difficulties may prevent these employees  
15  
16 from working. Employees in higher occupational classes typically have more complex and mentally  
17  
18 demanding jobs [28]. In studies examining the socioeconomic differences in sickness absence,  
19  
20 physical working conditions have been found to be the strongest explanatory factor [12,16].  
21  
22

23 However, employees in our study are fairly young and thus adverse physical or psychosocial  
24  
25 working conditions might not have yet affected their health, as health-related effects usually  
26  
27 increase with age. In addition, the unique OHS system where the visits associated with occupational  
28  
29 health hazards (preventive services) are recorded separately from primary care visits may contribute  
30  
31 to the differences seen in our results. For example visits with more chronic work-related reason are  
32  
33 usually not recorded as primary care visits. Thus, the overall utilization of OHS requires further  
34  
35 research.  
36  
37  
38  
39

40  
41 Our study indicates that service use patterns might recognize vulnerable groups more precisely than  
42  
43 just belonging to certain occupation or occupational class may do. Despite this, the two lowest  
44  
45 occupational classes may need extra attention based on their OHS utilization patterns. Case  
46  
47 management protocols are essential in coordinating patient-centered care path which also saves  
48  
49 costs [8,9,29]. Among younger employees, timely treatment is highly important, as it might prevent  
50  
51 the worsening of their condition. OHS should identify those employees who use services a lot.  
52  
53

54  
55 Previous longitudinal studies using OHS data are lacking, but recent studies have showed that  
56  
57 frequent utilization of OHS was associated with psychiatric problems and musculoskeletal disorders  
58  
59 [2], whereas the latter also predicts persistent frequent utilization [30]. Furthermore, frequent  
60

1  
2  
3 utilization has increased the risk of long sickness absence [31] and disability pension [32]. These  
4  
5 associations highlight the need of identifying those in risk for more severe illness and work  
6  
7 disability at an early stage, and information on the different utilization trajectories with identified  
8  
9 occupational class differences supports these preventive actions. Moreover, some comparisons can  
10  
11 be made with the studies investigating frequent attenders in primary care. Frequent attenders in  
12  
13 primary care in the general population have been studied particularly in Netherlands and in Sweden  
14  
15 using questionnaire surveys and record linkage. These studies had participants from a wide range of  
16  
17 sociodemographic backgrounds and they consider only visits to general practitioners, thus their  
18  
19 direct comparability to OHS utilization is difficult. In addition, the definition of frequent attender  
20  
21 varies between studies [33]. However, previous studies have found out that frequent attenders have  
22  
23 multiple reasons for presenting [34], but overall chronic illnesses [33], somatic diseases and  
24  
25 symptoms [35,36] and especially psychiatric problems [35] have been associated with more  
26  
27 frequent primary care service use. Frequent attenders have more health discomfort, low mastery,  
28  
29 and they may be more vulnerable for stressful life events due to inadequate coping strategies  
30  
31 [27,37,38]. In line with the study by Reho et al. [31,32], frequent attenders are a high-risk group for  
32  
33 long-term sickness absence and disability pension also in general population [27]. According to two  
34  
35 previous Dutch studies one out of every seven 1-year frequent attenders becomes persistent frequent  
36  
37 attender and six out of seven are transient frequent attenders [35,39]. Based on this previous  
38  
39 evidence the inclusion of diagnostic information would be important in future studies of OHS  
40  
41 utilization. However, from the methodological viewpoint both the Dutch and Swedish research  
42  
43 groups point out that age should be taken into account when studying the frequent attenders, as not  
44  
45 only the reasons for high service utilization but also what constitutes high use highly differ by age  
46  
47 group [36,40].  
48  
49  
50  
51  
52  
53  
54  
55  
56  
57  
58  
59  
60

### *Methodological considerations*

The registers used in this study are reliable and comprehensive. We focused on all occupational groups within the far largest municipality in Finland and the sample consisted all of 20-34-year-old employees within this organization. The occupational health care policies are same for all these employees and have remained same during the study period of 2004-2017. Our study avoids a common limitation of OHS studies that they are based on limited samples with data on only those attending the service (e.g. [2]) or those responding to survey [3]. Another advantage of this study is that we could make inferences based on longitudinal cohort data instead of relying on cross-sectional evidence. Limitations of the data include the lack of information of diagnoses, physical and psychosocial working conditions, lifestyle factors and any primary care visits outside the OHS. In addition, people with initial poor health may attain lower educational level and end up in lower occupational positions. Unfortunately, our data does not extend beyond the current employment relations.

The OHS system in Finland is unique, thus comparison to other countries is difficult. The principle of primary care use is similar as in the general practice (GP) or family doctor setting in most other Western countries, but the patient population differs to some extent from ours in terms of demographics and employment status. In Finland, the employer offers (most employers do) those services and thus OHS is the main source for primary care for employees due to being free at the point of delivery and enabling an easy access. However, even within Finland, different employers can have different policies in terms of provision of primary care services. Nevertheless, our results can be broadly generalized to Finnish public sector employees.

The present study is to our knowledge the first one that used longitudinal latent class analysis aiming to capture OHS utilization as a complex longitudinal phenomenon. GBTM approach mixes the application of formal statistical criteria and subjective evaluation in model fitting [24]. One of its strength is that it allowed us to identify high OHS utilization over time. It is a limitation that

1  
2  
3 those who left the City of Helsinki within the first four years of their employment were lost to  
4  
5 follow-up. Another benefit is that GBTM is capable of identifying different OHS trajectories within  
6  
7 subjects that appear similar in terms of summary statistics. In this study we were able to distinguish  
8  
9 between two “low” trajectories, which may allow for better planning of targeted prevention  
10  
11 measures. However, we want to highlight that by this methodology it cannot be ascertained that the  
12  
13 observed subgroups are distinct population subgroups. As in case of any latent trajectory class  
14  
15 analyses, there is a possibility that the data could be interpreted as homogenous but non-normal  
16  
17 [41]. We find, however, the obtained groups to be realistic and the results applicable in terms of  
18  
19 real-life interpretations. However, further analysis with longer follow-up would be important to  
20  
21 confirm the trajectories found.  
22  
23  
24  
25  
26  
27  
28  
29

## 30 **Conclusions**

31  
32 We used GBTM for distinguishing four different developmental trajectories in OHS primary care  
33  
34 service utilization among 20-34-year-old employees of the City of Helsinki. Occupational class  
35  
36 differences exist in the utilization development trajectories. A large proportion of the young  
37  
38 employees do not use OHS primary care services and non-use is most common among the highest  
39  
40 occupational class. Especially trajectories where the utilization has grown or been high throughout  
41  
42 the follow-up had large occupational class differences, which followed the socioeconomic gradient.  
43  
44 Identifying high utilization patterns is important as ten per cent of employees that may be labeled  
45  
46 high and recurrent users account for 40% of the all OHS consultations.  
47  
48  
49  
50

51  
52 According to our results preventive measures should be considered among the trajectory groups of  
53  
54 “Low/increasing” and “High/recurrent”. In addition, attention should be paid to the two lowest  
55  
56 occupational classes, and their OHS utilization should be closely monitored by the occupational  
57  
58  
59  
60



1  
2  
3 health care in order to identify those in need for extra support. OHS utilization requires more  
4  
5 longitudinal research. Case management protocols should be further developed.  
6  
7  
8  
9

### 10 **Author contributions**

11  
12  
13  
14  
15 HS, AK & JH designed the study. HS mainly wrote the manuscript with contributions and  
16  
17 comments from all the other authors (JH, KP, OP, OR & AK), JH did the statistical analyses and  
18  
19 wrote the results section and OP commented those. All the authors have approved the final version  
20  
21 of the manuscript.  
22  
23  
24  
25

### 26 **Conflicts of Interest**

27  
28  
29 Authors declare no conflicts of interest.  
30  
31  
32  
33

### 34 **Funding**

35  
36 This study was funded by the Finnish Work Environment Fund (grant 117321) and the Academy of  
37  
38 Finland (grant 315343). AK was funded by the Economic and Social Research Council (ESRC)  
39  
40 (grant ES/L007509/1 and ES/S00744X/1). OR was funded by the Academy of Finland (grant  
41  
42 1294514). The funders had no involvement to the preparation of the manuscript.  
43  
44  
45  
46  
47

### 48 **Data sharing statement**

49  
50 Data cannot be shared publicly because it contains confidential medical information and the study  
51  
52 participants have not given their permission to data sharing. Data are kept at the University of  
53  
54 Helsinki computers and are available upon agreement with the Helsinki Health Study for  
55  
56 researchers who meet the criteria for access to confidential data.  
57  
58  
59  
60

## References

1. Kelasto-reports. 2019. Kelan työterveyshuoltotilasto 2017 (in Finnish). Official statistics of Finland. [https://helda.helsinki.fi/bitstream/handle/10138/303534/Kelan\\_tyoterveyshuoltotilasto\\_2017.pdf?sequence=1&isAllowed=y](https://helda.helsinki.fi/bitstream/handle/10138/303534/Kelan_tyoterveyshuoltotilasto_2017.pdf?sequence=1&isAllowed=y). (Accessed 6 Aug 2019).
2. Reho T, Atkins S, Talola N, Viljamaa M, Sumanen M, Uitti J. Frequent attenders in occupational health primary care: A cross-sectional study. *Scand J Public Health* 2018;1:1403494818777436.
3. Kimanen A, Rautio M, Manninen P, Räsänen K, Husman P, Husman K. Primary care visits to occupational health physicians and nurses in Finland. *Scand J Public Health* 2011;39:525-32.
4. Lahelma E, Aittomäki A, Laaksonen M, Lallukka T, Martikainen P, Piha K, et al. Cohort Profile: The Helsinki Health Study. *Int J Epidemiol* 2013;42:722–30.
5. Sumanen H, Pietiläinen O, Lahti J, Lahelma E, Rahkonen O. Sickness absence among young employees: trends from 2002 to 2013. *J Occup Health* 2015;57:474-81.
6. Sumanen H, Lahelma E, Lahti J, Pietiläinen O, Rahkonen O. Educational differences in sickness absence trends among young employees from 2002 to 2013 in Helsinki, Finland. *BMJ Open* 2016; 6:e008550.
7. Sumanen H, Lahelma E, Pietiläinen O, Rahkonen O. The Magnitude of Occupational Class Differences in Sickness Absence: 15-Year Trends among Young and Middle-Aged Municipal Employees. *Int J Environ Res Public Health* 2017;14:E625.
8. AAOHN. Case Management: The Occupational and Environmental Health Nurse Role. *Workplace Health Saf* 2013;61:8.
9. Robinson M, Fisher TF, Broussard K. Role of Occupational Therapy in Case Management and Care Coordination for Clients With Complex Conditions. *Am J Occup Ther* 2016;70:7002090010p1-7002090010p6.

10. Piha K, Laaksonen M, Martikainen P, Rahkonen O, Lahelma E. Interrelationships between education, occupational class, income and sickness absence. *Eur J Public Health* 2010;20:276-80.
11. Piha K, Martikainen P, Rahkonen O, Roos E, Lahelma E. Trends in socioeconomic differences in sickness absence among Finnish municipal employees 1990-99. *Scand J Public Health* 2007;35:348-55.
12. Laaksonen M, Piha K, Rahkonen O, Martikainen P, Lahelma E. Explaining occupational class differences in sickness absence: Results from middle-aged municipal employees. *J Epidemiol Community Health* 2010;64:802-7.
13. Sumanen H, Pietiläinen O, Lahti J, Lahelma E, Rahkonen O. Interrelationships between education, occupational class and income as determinants of sickness absence among young employees in 2002-2007 and 2008-2013. *BMC Public Health* 2015;15:332.
14. Pekkala J, Blomgren J, Pietiläinen O, Lahelma E, Rahkonen O. Occupational class differences in diagnostic-specific sickness absence: A register-based study in the Finnish population. *BMC Public Health* 2017;17:670.
15. Feeney A, North F, Head J, Canner R, Marmot M. Socioeconomic and sex differentials in reason for sickness absence from the Whitehall II study. *Occup Environ Med* 1998;55:91-8.
16. Christensen K, Labriola M, Lund T, Kivimäki M. Explaining the social gradient in long-term sickness absence: A prospective study of Danish employees. *J Epidemiol Community Health* 2008;62:181-3.
17. Hansen H, Ingebrigtsen T. Social class and sickness absence in Norway. *Acta Sociologica* 2008;51:309-27.
18. Löve J, Hensing G, Holmgren K, Toren K. Explaining the social gradient in sickness absence: A study of a general working population in Sweden. *BMC Public Health* 2013;13:545-2458-13-545.

- 1  
2  
3 19. Vahtera J, Virtanen P, Kivimäki M, Pentti J. Workplace as an origin of health inequalities. *J*  
4  
5 *Epidemiol Community Health* 1999;53:399-407.  
6  
7  
8 20. Morikawa Y, Martikainen P, Head J, Marmot M, Ishizaki M, Nakagawa H. A comparison of  
9  
10 socio-economic differences in long-term sickness absence in a Japanese cohort and a British cohort  
11  
12 of employed men. *Eur J Public Health* 2004;14:413-6.  
13  
14  
15 21. Kaikkonen R, Härkönen T, Rahkonen O, Gould R, Koskinen S. Explaining educational  
16  
17 differences in sickness absence: a population-based follow-up study. *Scand J Work Environ Health*  
18  
19 2015;41:338-46.  
20  
21  
22 22. Sumanen H. Work disability among young employees: Changes over time and socioeconomic  
23  
24 differences. *Dissertationes Scholae Doctoralis Ad Sanitatem Investigandam Universitatis*  
25  
26 *Helsinkiensis*; nro 18/2016.  
27  
28  
29 23. Eurostat. 2019. Participation of Young People in Education and the Labour Market.  
30  
31 [https://ec.europa.eu/eurostat/statistics-](https://ec.europa.eu/eurostat/statistics-explained/index.php?title=Participation_of_young_people_in_education_and_the_labour_market&oldid=433402#Participation_of_young_persons_in_formal_education_and_in_the_labour_market)  
32  
33 [explained/index.php?title=Participation\\_of\\_young\\_people\\_in\\_education\\_and\\_the\\_labour\\_market&](https://ec.europa.eu/eurostat/statistics-explained/index.php?title=Participation_of_young_people_in_education_and_the_labour_market&oldid=433402#Participation_of_young_persons_in_formal_education_and_in_the_labour_market)  
34  
35 [oldid=433402#Participation\\_of\\_young\\_persons\\_in\\_formal\\_education\\_and\\_in\\_the\\_labour\\_market.](https://ec.europa.eu/eurostat/statistics-explained/index.php?title=Participation_of_young_people_in_education_and_the_labour_market&oldid=433402#Participation_of_young_persons_in_formal_education_and_in_the_labour_market)  
36  
37  
38 (Accessed 6 Aug 2019)  
39  
40  
41  
42 24. Jones BL, Nagin DS. 2012. A Stata Plugin for Estimating Group-Based Trajectory Models.  
43  
44 [https://ssrc.indiana.edu/doc/wimdocs/2013-03-29\\_nagin\\_trajectory\\_stata-plugin-info.pdf](https://ssrc.indiana.edu/doc/wimdocs/2013-03-29_nagin_trajectory_stata-plugin-info.pdf) (accessed  
45  
46 1 Jun 2018)  
47  
48  
49 25. Nagin D. 2005. *Group-Based Modeling of Development*. Cambridge, Mass: Harvard University  
50  
51 Press.  
52  
53  
54 26. Nagin DS, Odgers CL. Group-Based Trajectory Modeling in Clinical Research. *Annu Rev Clin*  
55  
56 *Psychol* 2010;6:109–38.  
57  
58  
59  
60

- 1  
2  
3 27. Bergh H, Baigi A, Månsson J, Mattsson B, Marklund B. Predictive factors for long-term sick  
4 leave and disability pension among frequent and normal attenders in primary health care over 5  
5 years. *Public Health* 2007;121:25-33.  
6  
7  
8  
9  
10 28. Nieuwenhuijsen K, Verbeek JH, de Boer AG, Blonk RW, van Dijk FJ: Predicting the duration  
11 of sickness absence for patients with common mental disorders in occupational health care. *Scand J*  
12 *Work Environ Health* 2006;32:67-74.  
13  
14  
15 29. Golden R. The importance of collaboration. *CMSA Today* 2015;4:21-2.  
16  
17  
18 30. Reho T, Atkins S, Talola N, Sumanen M, Viljamaa M, Uitti J. Comparing occasional and  
19 persistent frequent attenders in occupational health primary care - a longitudinal study. *BMC Public*  
20 *Health* 2018;26:1291.  
21  
22  
23 31. Reho TTM, Atkins SA, Talola N, Sumanen MPT, Viljamaa M, Uitti J. Occasional and  
24 persistent frequent attenders and sickness absences in occupational health primary care: a  
25 longitudinal study in Finland. *BMJ Open* 2019;19:e024980.  
26  
27  
28 32. Reho TTM, Atkins SA, Talola N, Sumanen MPT, Viljamaa M, Uitti J. Frequent attenders at risk  
29 of disability pension: a longitudinal study combining routine and register data. *Scand J Public*  
30 *Health* 2019;11:1403494819838663.  
31  
32  
33 33. Vedsted P, Christensen MB. Frequent attenders in general practice care: a literature review with  
34 special reference to methodological considerations. *Public Health* 2005;119:118-37.  
35  
36  
37 34. Smits FT, Brouwer HJ, Schene AH, van Weert HC, Ter Riet G. Is frequent attendance of longer  
38 duration related to less transient episodes of care? A retrospective analysis of transient and chronic  
39 episodes of care. *BMJ Open* 2016;6:e012563.  
40  
41  
42  
43  
44  
45  
46  
47  
48  
49  
50  
51  
52  
53  
54  
55  
56  
57  
58  
59  
60

- 1  
2  
3 35. Smits FT, Brouwer HJ, ter Riet G, van Weert HC. Epidemiology of frequent attenders: a 3-year  
4 historic cohort study comparing attendance, morbidity and prescriptions of one-year and persistent  
5 frequent attenders. *BMC Public Health* 2009;9:36.  
6  
7  
8  
9  
10 36. Bergh H, Marklund B. Characteristics of frequent attenders in different age and sex groups in  
11 primary health care. *Scand J Prim Health Care* 2003;21:171-7.  
12  
13  
14  
15 37. Bergh H, Baigi A, Fridlund B, Marklund B. Life events, social support and sense of coherence  
16 among frequent attenders in primary health care. *Public Health* 2006;120:229-36.  
17  
18  
19  
20 38. Smits FT, Brouwer HJ, Zwinderman AH, Mohrs J, Schene AH, van Weert HC, ter Riet G. Why  
21 do they keep coming back? Psychosocial etiology of persistence of frequent attendance in primary  
22 care: a prospective cohort study. *J Psychosom Res* 2014;77:492-503.  
23  
24  
25  
26  
27  
28 39. Smits FT, Brouwer HJ, van Weert HC, Schene AH, ter Riet G. Predictability of persistent  
29 frequent attendance: a historic 3-year cohort study. *Br J Gen Pract* 2009;59:e44-50.  
30  
31  
32  
33 40. Smits FT, Mohrs JJ, Beem EE, Bindels PJ, van Weert HC. Defining frequent attendance in  
34 general practice. *BMC Fam Pract*.2008;15:21.  
35  
36  
37  
38  
39 41. Bauer DJ, Curran PJ. Distributional Assumptions of Growth Mixture Models: Implications for  
40 Overextraction of Latent Trajectory Classes. *Psychological Methods* 2003;8:338-63.  
41  
42  
43  
44  
45  
46  
47  
48  
49  
50  
51  
52  
53  
54  
55  
56  
57  
58  
59  
60

Table 1. Descriptive statistics of the four occupational classes among 2,454 male The City of Helsinki employees aged 20-34 years. Results are based on register data covering the years from 2004 to 2017.

|                                                    | Total           |           |                           |           | Occupational class |           |                            |           |                |           |        |           |
|----------------------------------------------------|-----------------|-----------|---------------------------|-----------|--------------------|-----------|----------------------------|-----------|----------------|-----------|--------|-----------|
|                                                    | OHS visits p.a. |           | Managers or professionals |           | Semi-professionals |           | Routine non-manual workers |           | Manual workers |           |        |           |
|                                                    | N               | % / (sd.) | N                         | 1 / 1 000 | n                  | % / (sd.) | n                          | % / (sd.) | n              | % / (sd.) | n      | % / (sd.) |
| <b>Total</b>                                       | 2454            | 100.0     | 2528                      | 1030.3    | 594                | 100.0     | 286                        | 100.0     | 677            | 100.0     | 897    | 100.0     |
| The length of the follow-up in days, average (sd.) | 1341            | (252)     |                           |           | 1371               | (204)     | 1382                       | (191)     | 1290           | (292)     | 1348   | (260)     |
| OHS visits per annum, 1 / 1000 (sd.)               | 1030.3          | (1435.3)  |                           |           | 705.4              | (939.4)   | 996.5                      | (1151.3)  | 1121.5         | (1482.1)  | 1187.3 | (1695.8)  |
| <b>Outcome: Trajectory group</b>                   |                 |           |                           |           |                    |           |                            |           |                |           |        |           |
| 1. No OHS visits                                   | 1337            | 54.5      | 225                       | 168.5     | 374                | 63.0      | 148                        | 51.7      | 349            | 51.6      | 466    | 52.0      |
| 2. Low/increasing                                  | 420             | 17.1      | 626                       | 1489.3    | 91                 | 15.3      | 54                         | 18.9      | 131            | 19.4      | 144    | 16.1      |
| 3. Low/decreasing                                  | 496             | 20.2      | 728                       | 1468.2    | 113                | 19.0      | 63                         | 22.0      | 138            | 20.4      | 182    | 20.3      |
| 4. High/recurrent                                  | 201             | 8.2       | 949                       | 4722.6    | 16                 | 2.7       | 21                         | 7.3       | 59             | 8.7       | 105    | 11.7      |
| <b>Covariates</b>                                  |                 |           |                           |           |                    |           |                            |           |                |           |        |           |
| <b>Age (years)</b>                                 |                 |           |                           |           |                    |           |                            |           |                |           |        |           |
| 20 - 24                                            | 618             | 25.2      | 684                       | 1107.2    | 23                 | 3.9       | 38                         | 13.3      | 221            | 32.6      | 336    | 37.5      |
| 25 - 29                                            | 1077            | 43.9      | 996                       | 924.6     | 299                | 50.3      | 152                        | 53.1      | 296            | 43.7      | 330    | 36.8      |
| 30 - 34                                            | 759             | 30.9      | 848                       | 1117.6    | 272                | 45.8      | 96                         | 33.6      | 160            | 23.6      | 231    | 25.8      |
| <b>First language</b>                              |                 |           |                           |           |                    |           |                            |           |                |           |        |           |
| Finnish                                            | 2154            | 87.8      | 2219                      | 1029.9    | 499                | 84.0      | 272                        | 95.1      | 589            | 87.0      | 794    | 88.5      |

|                                   |      |      |      |        |     |      |     |      |     |      |     |      |
|-----------------------------------|------|------|------|--------|-----|------|-----|------|-----|------|-----|------|
| Swedish                           | 81   | 3.3  | 36   | 438.3  | 47  | 7.9  | 2   | 0.7  | 24  | 3.5  | 8   | 0.9  |
| Other                             | 193  | 7.9  | 256  | 1327.7 | 24  | 4.0  | 12  | 4.2  | 62  | 9.2  | 95  | 10.6 |
| <b>Education</b>                  |      |      |      |        |     |      |     |      |     |      |     |      |
| Basic education / Lower secondary | 1595 | 65.0 | 1807 | 1132.8 | 136 | 22.9 | 115 | 40.2 | 530 | 78.3 | 814 | 90.7 |
| Upper secondary                   | 476  | 19.4 | 453  | 951.2  | 126 | 21.2 | 149 | 52.1 | 130 | 19.2 | 71  | 7.9  |
| Higher education                  | 383  | 15.6 | 269  | 701.7  | 332 | 55.9 | 22  | 7.7  | 17  | 2.5  | 12  | 1.3  |

Table 2. Descriptive statistics of the four occupational classes among 7,308 female The City of Helsinki employees aged 20-34 years. Results are based on register data covering the years from 2004 to 2017.

|                                                    | Total           |           |           |           | Occupational class               |           |                           |           |                                   |           |                       |           |
|----------------------------------------------------|-----------------|-----------|-----------|-----------|----------------------------------|-----------|---------------------------|-----------|-----------------------------------|-----------|-----------------------|-----------|
|                                                    | OHS visits p.a. |           | 1 / 1 000 |           | <i>Managers or professionals</i> |           | <i>Semi-professionals</i> |           | <i>Routine non-manual workers</i> |           | <i>Manual workers</i> |           |
|                                                    | N               | % / (sd.) | N         | 1 / 1 000 | n                                | % / (sd.) | n                         | % / (sd.) | n                                 | % / (sd.) | n                     | % / (sd.) |
| <b>Total</b>                                       | 7308            | 100.0     | 8470      | 1158.9    | 1678                             | 100.0     | 1538                      | 100.0     | 3387                              | 100.0     | 705                   | 100.0     |
| The length of the follow-up in days, average (sd.) | 1328            | (254)     |           |           | 1326                             | (244)     | 1375                      | (202)     | 1310                              | (272)     | 1322                  | (281)     |
| OHS visits per annum, 1 / 1000 (sd.)               | 1158.9          | (1499.2)  |           |           | 850.9                            | (1114.0)  | 1141.7                    | (1357.4)  | 1268.7                            | (1627.4)  | 1402.5                | (1808.0)  |
| <b>Outcome: Trajectory group</b>                   |                 |           |           |           |                                  |           |                           |           |                                   |           |                       |           |
| 1. No OHS visits                                   | 3623            | 49.6      | 644       | 177.7     | 972                              | 57.9      | 734                       | 47.7      | 1599                              | 47.2      | 318                   | 45.1      |
| 2. Low/increasing                                  | 1281            | 17.5      | 1922      | 1500.2    | 264                              | 15.7      | 249                       | 16.2      | 627                               | 18.5      | 141                   | 20.0      |
| 3. Low/decreasing                                  | 1651            | 22.6      | 2455      | 1487.0    | 347                              | 20.7      | 397                       | 25.8      | 759                               | 22.4      | 148                   | 21.0      |



|    |                          |      |      |      |        |      |      |      |      |      |      |     |      |
|----|--------------------------|------|------|------|--------|------|------|------|------|------|------|-----|------|
| 1  |                          |      |      |      |        |      |      |      |      |      |      |     |      |
| 2  |                          |      |      |      |        |      |      |      |      |      |      |     |      |
| 3  | 4. High/recurrent        | 753  | 10.3 | 3449 | 4580.3 | 95   | 5.7  | 158  | 10.3 | 402  | 11.9 | 98  | 13.9 |
| 4  |                          |      |      |      |        |      |      |      |      |      |      |     |      |
| 5  | <b><i>Covariates</i></b> |      |      |      |        |      |      |      |      |      |      |     |      |
| 6  |                          |      |      |      |        |      |      |      |      |      |      |     |      |
| 7  | <b>Age</b>               |      |      |      |        |      |      |      |      |      |      |     |      |
| 8  | 20 - 24                  | 2252 | 30.8 | 2693 | 1195.6 | 142  | 8.5  | 443  | 28.8 | 1412 | 41.7 | 255 | 36.2 |
| 9  | 25 - 29                  | 3152 | 43.1 | 3565 | 1130.9 | 959  | 57.2 | 693  | 45.1 | 1233 | 36.4 | 267 | 37.9 |
| 10 | 30 - 34                  | 1904 | 26.1 | 2212 | 1161.9 | 577  | 34.4 | 402  | 26.1 | 742  | 21.9 | 183 | 26.0 |
| 11 |                          |      |      |      |        |      |      |      |      |      |      |     |      |
| 12 |                          |      |      |      |        |      |      |      |      |      |      |     |      |
| 13 | <b>Language</b>          |      |      |      |        |      |      |      |      |      |      |     |      |
| 14 | Finnish                  | 6451 | 88.3 | 7627 | 1182.3 | 1403 | 83.6 | 1422 | 92.5 | 3020 | 89.2 | 606 | 86.0 |
| 15 | Swedish                  | 324  | 4.4  | 307  | 947.5  | 158  | 9.4  | 51   | 3.3  | 109  | 3.2  | 6   | 0.9  |
| 16 | Other                    | 448  | 6.1  | 479  | 1068.6 | 40   | 2.4  | 64   | 4.2  | 252  | 7.4  | 92  | 13.0 |
| 17 |                          |      |      |      |        |      |      |      |      |      |      |     |      |
| 18 | <b>Education</b>         |      |      |      |        |      |      |      |      |      |      |     |      |
| 19 |                          |      |      |      |        |      |      |      |      |      |      |     |      |
| 20 | Basic education / Lower  | 3641 | 49.8 | 4667 | 1281.8 | 273  | 16.3 | 232  | 15.1 | 2541 | 75.0 | 595 | 84.4 |
| 21 | secondary                |      |      |      |        |      |      |      |      |      |      |     |      |
| 22 | Upper secondary          | 2319 | 31.7 | 2565 | 1105.9 | 270  | 16.1 | 1211 | 78.7 | 755  | 22.3 | 83  | 11.8 |
| 23 | Higher education         | 1348 | 18.4 | 1238 | 918.4  | 1135 | 67.6 | 95   | 6.2  | 91   | 2.7  | 27  | 3.8  |
| 24 |                          |      |      |      |        |      |      |      |      |      |      |     |      |
| 25 |                          |      |      |      |        |      |      |      |      |      |      |     |      |
| 26 |                          |      |      |      |        |      |      |      |      |      |      |     |      |
| 27 |                          |      |      |      |        |      |      |      |      |      |      |     |      |
| 28 |                          |      |      |      |        |      |      |      |      |      |      |     |      |
| 29 |                          |      |      |      |        |      |      |      |      |      |      |     |      |
| 30 |                          |      |      |      |        |      |      |      |      |      |      |     |      |
| 31 |                          |      |      |      |        |      |      |      |      |      |      |     |      |
| 32 |                          |      |      |      |        |      |      |      |      |      |      |     |      |
| 33 |                          |      |      |      |        |      |      |      |      |      |      |     |      |
| 34 |                          |      |      |      |        |      |      |      |      |      |      |     |      |
| 35 |                          |      |      |      |        |      |      |      |      |      |      |     |      |
| 36 |                          |      |      |      |        |      |      |      |      |      |      |     |      |
| 37 |                          |      |      |      |        |      |      |      |      |      |      |     |      |
| 38 |                          |      |      |      |        |      |      |      |      |      |      |     |      |
| 39 |                          |      |      |      |        |      |      |      |      |      |      |     |      |
| 40 |                          |      |      |      |        |      |      |      |      |      |      |     |      |
| 41 |                          |      |      |      |        |      |      |      |      |      |      |     |      |
| 42 |                          |      |      |      |        |      |      |      |      |      |      |     |      |
| 43 |                          |      |      |      |        |      |      |      |      |      |      |     |      |
| 44 |                          |      |      |      |        |      |      |      |      |      |      |     |      |
| 45 |                          |      |      |      |        |      |      |      |      |      |      |     |      |
| 46 |                          |      |      |      |        |      |      |      |      |      |      |     |      |

Table 3. Multinomial logistic regression on occupational class as a determinant of occupational health service (OHS) trajectories among 9762 City of Helsinki employees aged 20-34 years. Results are based on register data covering the years from 2004 to 2017.

| Trajectory                 | OHS trajectory comparison        |                    |
|----------------------------|----------------------------------|--------------------|
|                            | Low/increasing vs. No OHS visits |                    |
|                            | Model 1*                         | Model 2**          |
| <b>Men</b>                 |                                  |                    |
| Managers or professionals  | 1.00                             | 1.00               |
| Semi-professionals         | 1.55 (1.04 - 2.31)               | 1.31 (0.85 - 2.03) |
| Routine non-manual workers | 1.71 (1.24 - 2.37)               | 1.40 (0.96 - 2.06) |
| Manual workers             | 1.38 (1.00 - 1.90)               | 1.12 (0.76 - 1.66) |
| <b>Women</b>               |                                  |                    |
| Managers or professionals  | 1.00                             | 1.00               |
| Semi-professionals         | 1.25 (1.02 - 1.54)               | 1.19 (0.92 - 1.53) |
| Routine non-manual workers | 1.47 (1.24 - 1.76)               | 1.40 (1.11 - 1.76) |
| Manual workers             | 1.64 (1.28 - 2.11)               | 1.55 (1.16 - 2.08) |
| Trajectory                 | Low/decreasing vs. No OHS visits |                    |
|                            | Model 1*                         | Model 2**          |
| <b>Men</b>                 |                                  |                    |
| Managers or professionals  | 1.00                             | 1.00               |
| Semi-professionals         | 1.32 (0.91 - 1.91)               | 1.45 (0.96 - 2.19) |
| Routine non-manual workers | 1.31 (0.97 - 1.77)               | 1.53 (1.05 - 2.22) |
| Manual workers             | 1.26 (0.94 - 1.68)               | 1.50 (1.04 - 2.18) |
| <b>Women</b>               |                                  |                    |
| Managers or professionals  | 1.00                             | 1.00               |
| Semi-professionals         | 1.48 (1.24 - 1.77)               | 1.71 (1.36 - 2.15) |
| Routine non-manual workers | 1.33 (1.13 - 1.56)               | 1.67 (1.34 - 2.07) |

1  
2  
3  
4  
5  
6  
7  
8  
9  
10  
11  
12  
13  
14  
15  
16  
17  
18  
19  
20  
21  
22  
23  
24  
25  
26  
27  
28  
29  
30  
31  
32  
33  
34  
35  
36  
37  
38  
39  
40  
41  
42  
43  
44  
45  
46  
47  
48  
49  
50  
51  
52  
53  
54  
55  
56  
57  
58  
59  
60

|                |                    |                    |
|----------------|--------------------|--------------------|
| Manual workers | 1.30 (1.02 - 1.65) | 1.65 (1.25 - 2.19) |
|----------------|--------------------|--------------------|

**Trajectory**

High/recurrent vs. No OHS visits

Model 1\*

Model 2\*\*

**Men**

|                            |                    |                    |
|----------------------------|--------------------|--------------------|
| Managers or professionals  | 1.00               | 1.00               |
| Semi-professionals         | 3.21 (1.62 - 6.36) | 2.60 (1.23 - 5.49) |
| Routine non-manual workers | 3.99 (2.22 - 7.17) | 2.92 (1.48 - 5.74) |
| Manual workers             | 5.02 (2.86 - 8.80) | 3.56 (1.83 - 6.92) |

**Women**

|                            |                    |                    |
|----------------------------|--------------------|--------------------|
| Managers or professionals  | 1.00               | 1.00               |
| Semi-professionals         | 2.13 (1.61 - 2.81) | 2.29 (1.62 - 3.24) |
| Routine non-manual workers | 2.53 (1.98 - 3.25) | 2.28 (1.65 - 3.15) |
| Manual workers             | 3.10 (2.25 - 4.27) | 2.71 (1.85 - 3.97) |

Model 1\* = Model adjusted for age and first language, Model 2\*\* = M1 + education

Figure 1. Four occupational health service trajectories, based on registers covering the years 2004 to 2017 among 9762 the City of Helsinki employees aged 20-34 years. 1 = No visits, 2 = Low/increasing, 3 = Low/decreasing, 4 = High/recurrent use.

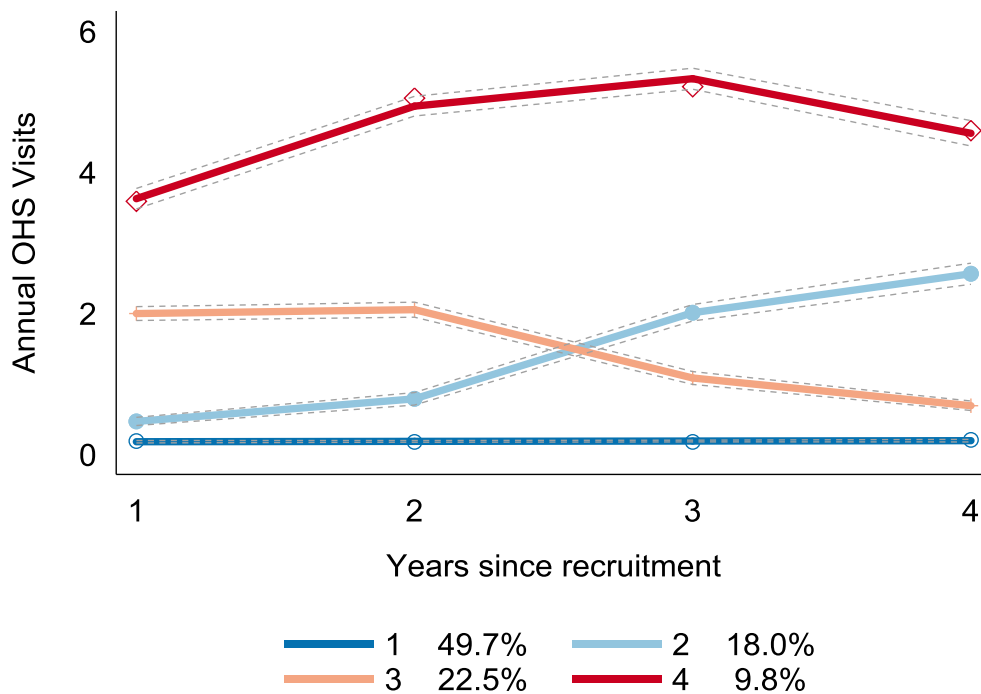

Figure 1. Four occupational health service trajectories, based on registers covering the years 2004 to 2017 among 9762 the City of Helsinki employees aged 20-34 years. 1 = No visits, 2 = Low/increasing, 3 = Low/decreasing, 4 = High/recurrent use.

1  
2  
3  
4  
5  
6  
7  
8  
9  
10  
11  
12  
13  
14  
15  
16  
17  
18  
19  
20  
21  
22  
23  
24  
25  
26  
27  
28  
29  
30  
31  
32  
33  
34  
35  
36  
37  
38  
39  
40  
41  
42  
43  
44  
45  
46  
47  
48  
49  
50  
51  
52  
53  
54  
55  
56  
57  
58  
59  
60

## Web-appendix 1. Comparison between those included\* and those not included\* in the present study, men

| Men                                | Total |       | Included |       | Excluded |       |
|------------------------------------|-------|-------|----------|-------|----------|-------|
|                                    | N     | %     | N        | %     | N        | %     |
| <b>Total</b>                       | 6413  | 100.0 | 2454     | 100.0 | 3959     | 100.0 |
| <b>Age</b>                         |       |       |          |       |          |       |
| 20 - 24                            | 2170  | 33.8  | 618      | 25.2  | 1552     | 39.2  |
| 25 - 29                            | 2507  | 39.1  | 1077     | 43.9  | 1430     | 36.1  |
| 30 - 34                            | 1736  | 27.1  | 759      | 30.9  | 977      | 24.7  |
| <b>Language</b>                    |       |       |          |       |          |       |
| Finnish                            | 5580  | 87.0  | 2154     | 87.8  | 3426     | 86.5  |
| Swedish                            | 274   | 4.3   | 81       | 3.3   | 193      | 4.9   |
| Other                              | 501   | 7.8   | 193      | 7.9   | 308      | 7.8   |
| <b>Education</b>                   |       |       |          |       |          |       |
| Basic education / Lower secondary  | 4604  | 71.8  | 1595     | 65.0  | 3009     | 76.0  |
| Upper secondary                    | 927   | 14.5  | 476      | 19.4  | 451      | 11.4  |
| Higher education                   | 882   | 13.8  | 383      | 15.6  | 499      | 12.6  |
| <b>Occupational class</b>          |       |       |          |       |          |       |
| Managers or professionals          | 1331  | 20.8  | 594      | 24.2  | 737      | 18.6  |
| Semi-professionals                 | 587   | 9.2   | 286      | 11.7  | 301      | 7.6   |
| Routine non-manual workers         | 1918  | 29.9  | 677      | 27.6  | 1241     | 31.3  |
| Manual workers                     | 2043  | 31.9  | 897      | 36.6  | 1146     | 28.9  |
| <b>Working hours per week</b>      |       |       |          |       |          |       |
| 32–45 h/wk                         | 5003  | 78.0  | 1967     | 80.2  | 3036     | 76.7  |
| <32 h/wk                           | 1410  | 22.0  | 487      | 19.8  | 923      | 23.3  |
| <b>Type of employment contract</b> |       |       |          |       |          |       |
| Permanent contract                 | 4603  | 71.8  | 2117     | 86.3  | 2486     | 62.8  |
| Other contract type                | 1810  | 28.2  | 337      | 13.7  | 1473     | 37.2  |

\*Included = employed by the City of Helsinki for at least 4 years and complete data on occupational position, Not included= employed by the City of Helsinki less than 4 years or incomplete data on occupational position.

Web-appendix 2. Comparison between those included\* and those not included\* in the present study, women

| Women                              | Total |       | Included |       | Excluded |       |
|------------------------------------|-------|-------|----------|-------|----------|-------|
|                                    | N     | %     | N        | %     | N        | %     |
| <b>Total</b>                       | 16163 | 100.0 | 7308     | 100.0 | 8855     | 100.0 |
| <b>Age</b>                         |       |       |          |       |          |       |
| 20 - 24                            | 5609  | 34.7  | 2252     | 30.8  | 3357     | 37.9  |
| 25 - 29                            | 6735  | 41.7  | 3152     | 43.1  | 3583     | 40.5  |
| 30 - 34                            | 3819  | 23.6  | 1904     | 26.1  | 1915     | 21.6  |
| <b>Language</b>                    |       |       |          |       |          |       |
| Finnish                            | 14028 | 86.8  | 6451     | 88.3  | 7577     | 85.6  |
| Swedish                            | 803   | 5.0   | 324      | 4.4   | 479      | 5.4   |
| Other                              | 1137  | 7.0   | 448      | 6.1   | 689      | 7.8   |
| <b>Education</b>                   |       |       |          |       |          |       |
| Basic education / Lower secondary  | 8785  | 54.4  | 3641     | 49.8  | 5144     | 58.1  |
| Upper secondary                    | 4420  | 27.3  | 2319     | 31.7  | 2101     | 23.7  |
| Higher education                   | 2958  | 18.3  | 1348     | 18.4  | 1610     | 18.2  |
| <b>Occupational class</b>          |       |       |          |       |          |       |
| Managers or professionals          | 3674  | 22.7  | 1679     | 23.0  | 1995     | 22.5  |
| Semi-professionals                 | 2833  | 17.5  | 1538     | 21.0  | 1295     | 14.6  |
| Routine non-manual workers         | 7561  | 46.8  | 3385     | 46.3  | 4176     | 47.2  |
| Manual workers                     | 1875  | 11.6  | 706      | 9.7   | 1169     | 13.2  |
| <b>Working hours per week</b>      |       |       |          |       |          |       |
| 32–45 h/wk                         | 12678 | 78.4  | 5891     | 80.6  | 6787     | 76.6  |
| <32 h/wk                           | 3485  | 21.6  | 1417     | 19.4  | 2068     | 23.4  |
| <b>Type of employment contract</b> |       |       |          |       |          |       |
| Permanent contract                 | 13059 | 80.8  | 6422     | 87.9  | 6637     | 75.0  |
| Other contract type                | 3104  | 19.2  | 886      | 12.1  | 2218     | 25.0  |

\*Included = employed by the City of Helsinki for at least 4 years and complete data on occupational position, Not included= employed by the City of Helsinki less than 4 years or incomplete data on occupational position.

## STROBE Statement—checklist of items that should be included in reports of observational studies

## Young Employees' Trajectories and Occupational Class Differences in Utilization of Primary Care Services Provided by Occupational Health Service

Hilla Sumanen, PhD

Jaakko Harkko, PhD

Kustaa Piha, PhD

Olli Pietiläinen, MSc

Ossi Rahkonen, Professor

Anne Kouvonen, Professor

|                           | Item No | Recommendation                                                                                                                                                                                                                                                                                                                                                                                                                                                         | Done, page |
|---------------------------|---------|------------------------------------------------------------------------------------------------------------------------------------------------------------------------------------------------------------------------------------------------------------------------------------------------------------------------------------------------------------------------------------------------------------------------------------------------------------------------|------------|
| <b>Title and abstract</b> | 1       | (a) Indicate the study's design with a commonly used term in the title or the abstract                                                                                                                                                                                                                                                                                                                                                                                 | 3          |
|                           |         | (b) Provide in the abstract an informative and balanced summary of what was done and what was found                                                                                                                                                                                                                                                                                                                                                                    | 3          |
| <b>Introduction</b>       |         |                                                                                                                                                                                                                                                                                                                                                                                                                                                                        |            |
| Background/rationale      | 2       | Explain the scientific background and rationale for the investigation being reported                                                                                                                                                                                                                                                                                                                                                                                   | 4-5        |
| Objectives                | 3       | State specific objectives, including any prespecified hypotheses                                                                                                                                                                                                                                                                                                                                                                                                       | 5          |
| <b>Methods</b>            |         |                                                                                                                                                                                                                                                                                                                                                                                                                                                                        |            |
| Study design              | 4       | Present key elements of study design early in the paper                                                                                                                                                                                                                                                                                                                                                                                                                | 5          |
| Setting                   | 5       | Describe the setting, locations, and relevant dates, including periods of recruitment, exposure, follow-up, and data collection                                                                                                                                                                                                                                                                                                                                        | 5-6        |
| Participants              | 6       | (a) <i>Cohort study</i> —Give the eligibility criteria, and the sources and methods of selection of participants. Describe methods of follow-up<br><i>Case-control study</i> —Give the eligibility criteria, and the sources and methods of case ascertainment and control selection. Give the rationale for the choice of cases and controls<br><i>Cross-sectional study</i> —Give the eligibility criteria, and the sources and methods of selection of participants | 5-6        |
|                           |         | (b) <i>Cohort study</i> —For matched studies, give matching criteria and number of exposed and unexposed<br><i>Case-control study</i> —For matched studies, give matching criteria and the number of controls per case                                                                                                                                                                                                                                                 |            |
| Variables                 | 7       | Clearly define all outcomes, exposures, predictors, potential confounders, and effect modifiers. Give diagnostic criteria, if applicable                                                                                                                                                                                                                                                                                                                               | 6-7        |
| Data sources/measurement  | 8*      | For each variable of interest, give sources of data and details of methods of assessment (measurement). Describe comparability of assessment methods if there is more than one group                                                                                                                                                                                                                                                                                   | 6          |
| Bias                      | 9       | Describe any efforts to address potential sources of bias                                                                                                                                                                                                                                                                                                                                                                                                              | 7, 14-     |

|                        |    |                                                                                                                                                                                                                                                                                                           |     |
|------------------------|----|-----------------------------------------------------------------------------------------------------------------------------------------------------------------------------------------------------------------------------------------------------------------------------------------------------------|-----|
|                        |    |                                                                                                                                                                                                                                                                                                           | 15  |
| Study size             | 10 | Explain how the study size was arrived at                                                                                                                                                                                                                                                                 | 5-6 |
| Quantitative variables | 11 | Explain how quantitative variables were handled in the analyses. If applicable, describe which groupings were chosen and why                                                                                                                                                                              | 7   |
| Statistical methods    | 12 | (a) Describe all statistical methods, including those used to control for confounding                                                                                                                                                                                                                     | 7   |
|                        |    | (b) Describe any methods used to examine subgroups and interactions                                                                                                                                                                                                                                       | 7   |
|                        |    | (c) Explain how missing data were addressed                                                                                                                                                                                                                                                               |     |
|                        |    | (d) <i>Cohort study</i> —If applicable, explain how loss to follow-up was addressed<br><i>Case-control study</i> —If applicable, explain how matching of cases and controls was addressed<br><i>Cross-sectional study</i> —If applicable, describe analytical methods taking account of sampling strategy |     |
|                        |    | (e) Describe any sensitivity analyses                                                                                                                                                                                                                                                                     | 10  |

| <b>Results</b>           |     |                                                                                                                                                                                                              | <b>Done, page</b> |
|--------------------------|-----|--------------------------------------------------------------------------------------------------------------------------------------------------------------------------------------------------------------|-------------------|
| Participants             | 13* | (a) Report numbers of individuals at each stage of study—eg numbers potentially eligible, examined for eligibility, confirmed eligible, included in the study, completing follow-up, and analysed            | 5-8               |
|                          |     | (b) Give reasons for non-participation at each stage                                                                                                                                                         |                   |
|                          |     | (c) Consider use of a flow diagram                                                                                                                                                                           |                   |
| Descriptive data         | 14* | (a) Give characteristics of study participants (eg demographic, clinical, social) and information on exposures and potential confounders                                                                     | 7-8               |
|                          |     | (b) Indicate number of participants with missing data for each variable of interest                                                                                                                          |                   |
|                          |     | (c) <i>Cohort study</i> —Summarise follow-up time (eg, average and total amount)                                                                                                                             | 5-6, 8            |
| Outcome data             | 15* | <i>Cohort study</i> —Report numbers of outcome events or summary measures over time                                                                                                                          | 6, 8              |
|                          |     | <i>Case-control study</i> —Report numbers in each exposure category, or summary measures of exposure                                                                                                         |                   |
|                          |     | <i>Cross-sectional study</i> —Report numbers of outcome events or summary measures                                                                                                                           |                   |
| Main results             | 16  | (a) Give unadjusted estimates and, if applicable, confounder-adjusted estimates and their precision (eg, 95% confidence interval). Make clear which confounders were adjusted for and why they were included | 7-10              |
|                          |     | (b) Report category boundaries when continuous variables were categorized                                                                                                                                    |                   |
|                          |     | (c) If relevant, consider translating estimates of relative risk into absolute risk for a meaningful time period                                                                                             |                   |
| Other analyses           | 17  | Report other analyses done—eg analyses of subgroups and interactions, and sensitivity analyses                                                                                                               | 10                |
| <b>Discussion</b>        |     |                                                                                                                                                                                                              |                   |
| Key results              | 18  | Summarise key results with reference to study objectives                                                                                                                                                     | 10-11             |
| Limitations              | 19  | Discuss limitations of the study, taking into account sources of potential bias or imprecision. Discuss both direction and magnitude of any potential bias                                                   | 14-15             |
| Interpretation           | 20  | Give a cautious overall interpretation of results considering objectives, limitations, multiplicity of analyses, results from similar studies, and other relevant evidence                                   | 10-15             |
| Generalisability         | 21  | Discuss the generalisability (external validity) of the study results                                                                                                                                        | 10-15             |
| <b>Other information</b> |     |                                                                                                                                                                                                              |                   |



|         |    |                                                                                                                                                               |    |
|---------|----|---------------------------------------------------------------------------------------------------------------------------------------------------------------|----|
| Funding | 22 | Give the source of funding and the role of the funders for the present study and, if applicable, for the original study on which the present article is based | 16 |
|---------|----|---------------------------------------------------------------------------------------------------------------------------------------------------------------|----|

\*Give information separately for cases and controls in case-control studies and, if applicable, for exposed and unexposed groups in cohort and cross-sectional studies.

**Note:** An Explanation and Elaboration article discusses each checklist item and gives methodological background and published examples of transparent reporting. The STROBE checklist is best used in conjunction with this article (freely available on the Web sites of PLoS Medicine at <http://www.plosmedicine.org/>, Annals of Internal Medicine at <http://www.annals.org/>, and Epidemiology at <http://www.epidem.com/>). Information on the STROBE Initiative is available at [www.strobe-statement.org](http://www.strobe-statement.org).

For peer review only

# BMJ Open

## The association between socio-economic position and occupational health service utilization trajectories among young municipal employees in Finland

|                                 |                                                                                                                                                                                                                                                                                                                                                                                                                                                                                                                 |
|---------------------------------|-----------------------------------------------------------------------------------------------------------------------------------------------------------------------------------------------------------------------------------------------------------------------------------------------------------------------------------------------------------------------------------------------------------------------------------------------------------------------------------------------------------------|
| Journal:                        | <i>BMJ Open</i>                                                                                                                                                                                                                                                                                                                                                                                                                                                                                                 |
| Manuscript ID                   | bmjopen-2018-028742.R2                                                                                                                                                                                                                                                                                                                                                                                                                                                                                          |
| Article Type:                   | Original research                                                                                                                                                                                                                                                                                                                                                                                                                                                                                               |
| Date Submitted by the Author:   | 24-Oct-2019                                                                                                                                                                                                                                                                                                                                                                                                                                                                                                     |
| Complete List of Authors:       | Sumanen, Hilla; South-Eastern Finland University of Applied Sciences, Health care and emergency care; University of Helsinki, Public Health<br>Harkko, Jaakko; University of Helsinki, Social Sciences<br>Piha, Kustaa ; University of Helsinki, Public Health<br>Pietilainen, Olli; University of Helsinki, Department of Public Health<br>Rahkonen, Ossi; University of Helsinki, Department of Public Health<br>Kouvonen, Anne; Helsingin Yliopisto, Faculty of Social Sciences; Queen's University Belfast, |
| <b>Primary Subject Heading</b>: | Health services research                                                                                                                                                                                                                                                                                                                                                                                                                                                                                        |
| Secondary Subject Heading:      | Occupational and environmental medicine                                                                                                                                                                                                                                                                                                                                                                                                                                                                         |
| Keywords:                       | health care visits, socioeconomic differences, young adults                                                                                                                                                                                                                                                                                                                                                                                                                                                     |
|                                 |                                                                                                                                                                                                                                                                                                                                                                                                                                                                                                                 |

SCHOLARONE™  
Manuscripts

1  
2  
3 The association between socio-economic position and occupational health service utilization  
4 trajectories among young municipal employees in Finland  
5  
6  
7

8 Hilla Sumanen, PhD 1,2,3  
9

10 Jaakko Harkko, PhD 3  
11

12 Kustaa Piha, MD, PhD 2  
13

14 Olli Pietiläinen, MSc 2  
15

16 Ossi Rahkonen, Professor 2  
17

18 Anne Kouvonen, Professor 3, 4, 5  
19

- 20 1. South-Eastern Finland University of Applied Sciences, Unit of Healthcare and Emergency  
21 care and Unit of Research, Development and Innovation
- 22 2. University of Helsinki, Faculty of Medicine, Department of Public Health
- 23 3. University of Helsinki, Faculty of Social Sciences
- 24 4. Research Institute of Psychology, SWPS University of Social Sciences and Humanities
- 25 5. Queen's University Belfast, Administrative Data Research Centre – Northern Ireland,  
26 Centre for Public Health  
27  
28  
29

30  
31  
32 Correspondence to: Hilla Sumanen, Department of Public Health, University of Helsinki, Finland,  
33 P.O. Box 20 (Tukholmankatu 8B), FIN-00014, University of Helsinki, Finland;  
34 [hilla.sumanen@helsinki.fi](mailto:hilla.sumanen@helsinki.fi)  
35  
36  
37  
38  
39  
40  
41  
42  
43  
44  
45  
46  
47  
48  
49  
50  
51  
52  
53  
54  
55  
56  
57  
58  
59  
60

### **What is already known about this subject?**

This is the first study utilizing longitudinal occupational health service data. All the findings are novel.

### **What are the new findings?**

We identified four occupational health service utilization groups among young employees: “No visits” (50%), “Low/increasing” (18%), “Low/decreasing” (22%) and “High/recurrent” (10%) use. Lower occupational classes had a higher propensity for “High/recurrent” OHS utilization for both genders.

### **How might this impact on policy or clinical practice in the foreseeable future?**

Preventive measures should be targeted particularly to the trajectory groups of “Low/increasing” and “High/recurrent” in order to intervene early. Occupational health service utilization should be more closely monitored among the two lowest occupational classes.

Running head: Young Employees’ Utilization of Occupational Health Service

## Abstract

**OBJECTIVES:** To identify groups of municipal employees between the ages of 20 and 34 years with distinct utilization trajectories of primary care services provided by occupational health service (OHS), measured as the annual number of OHS visits, and to identify demographic and socio-economic risk factors that distinguish employees in the high utilization trajectory group(s).

**METHODS:** The present study is a retrospective register-based cohort study. All municipal employees of the City of Helsinki, Finland, aged 20-34 in the Helsinki Health Study (HHS), recruited from 2004 to 2013, with follow-up data for four years were included in the study (n = 9762). The outcome measure was group-based trajectories of OHS utilization, identified with a group-based trajectory analysis (GBTA). The demographic and socio-economic variables used to predict the outcome were age, first language, educational level and occupational class. The analyses were stratified by gender.

**RESULTS:** A large proportion of the young employees do not utilize OHS. Trajectory groups of "No visits" (50%), "Low/increasing" (18%), "Low/decreasing" (22%) and "High/recurrent" (10%) use were identified. We found occupational class differences in OHS utilization patterns showing that lower occupational classes had a higher propensity for "High/recurrent" OHS utilization for both genders.

**CONCLUSIONS:** Preventive measures should be targeted particularly to the trajectory groups of "Low/increasing" and "High/recurrent" in order to intervene early. In addition, OHS utilization should be closely monitored among the two lowest occupational classes. More research with longitudinal OHS data is needed.

**Key terms:** Health care visits, Socioeconomic differences, Young adults, Occupational health

### Strengths and limitations of this study

- This is the first study utilizing longitudinal occupational health service data
- The sample consisted all of 20-34-year-old employees of the City of Helsinki. The occupational health care policies are same for all these employees and have remained same during the study period of 2004-2017.
- Our study avoids a common limitation of previous occupational health service studies that are based on limited samples with data on only those attending the service or those responding to survey.
- Limitations of the data include the lack of diagnostic information and lifestyle factors.
- The lack of information about other primary care visits outside the occupational health service further limits the interpretation of the results.

## Introduction

Finland has a unique occupational health service (OHS) system with statutory prevention of occupational health hazards (preventive services) and additionally purchased primary care services. OHS may be provided by employer's own OHS units, private clinics or public sector health centers with specifically trained occupational health physicians, nurses, physiotherapists and psychologists. In Finland, most employers purchase the additional primary care element for their employees. In 2017, 94% of the employees covered by statutory preventive OHS also had an access to primary care for any illness including all non-work related illnesses, paid by their employer and partly subsidized by the National Pension Fund [1]. OHSs are free for employees at the point of delivery and their accessibility is typically good, making them the main source and the preferred type of primary care for Finnish employees.

The utilization of OHS in Finland or elsewhere has been only scarcely studied, and especially studies using longitudinal data are lacking. There are few previous Finnish studies concentrating on the OHS primary care visits with cross-sectional study designs and from the viewpoint of service utilization over the course of 6 to 12 months. A recent study [2] with data from a large private Finnish OHS provider investigated the top 10% frequent attenders in primary care services in 2015. The results showed that frequent attendance was associated with female gender, being employed by a medium or a large company, working in the manufacturing industry, public administration or in health and social care services. In an earlier study with survey data (N=1636) from the Finnish working-age population [3], 57% of Finnish employees covered by the OHS primary care visited either their occupational health physician or nurse due to any illness during the 6-month period. In that study, those visits were strongly associated with chronic illness impacting occupational health and work ability. Both previous studies utilizing Finnish OHS data acknowledge the lack of research focusing to these unique services provided for the working population and identify the need for further study to identify service development needs and possibilities.

1  
2  
3 The current study utilizes longitudinal data from the own OHS unit of Finland's largest employer.  
4  
5 The City of Helsinki offers same OHSs with primary care for all its employees (n~38 000 per  
6  
7 year) with no cost for the employees. The City of Helsinki employees have been the focus of the  
8  
9 Helsinki Health Study [4] since 2000, but this is the first study using their OHS data. Our focus is  
10  
11 on the younger employees and their OHS utilization, as previous studies have shown that they have  
12  
13 a high prevalence of sickness absence (SA) [5] and there are already large socioeconomic  
14  
15 differences in SA apparent in the younger age groups [6-7]. Reducing SA is high on employers'  
16  
17 agenda. Service utilization information is important for planning preventive actions via targeted  
18  
19 interventions or improving case management protocols [8-9] arranged by the OHS. According to  
20  
21 extensive Finnish and international evidence, socioeconomic differences in SA are large [10-21],  
22  
23 thus it would be important to monitor the differences in OHS utilization from the socioeconomic  
24  
25 viewpoint and to be able to identify groups for interventions.  
26  
27  
28  
29

30  
31 In our study, we aimed to identify developmental trajectories of OHS primary care service  
32  
33 utilization among 20-34-year-old municipal employees of the City of Helsinki. In the second stage  
34  
35 of the analysis we aimed to identify occupational class differences in belonging to different  
36  
37 trajectory groups. We tested two hypothesis, first, that the distinct trajectories can be identified, and  
38  
39 second, that occupational class gradient can be found in OHS utilization.  
40  
41  
42  
43  
44  
45

## 46 **Methods**

47  
48  
49 This is a retrospective register-based cohort study. The study is a part of the Helsinki Health Study  
50  
51 on health and well-being among employees of the City of Helsinki, Finland [4]. The study included  
52  
53 all Helsinki City employees aged 20-34 at the beginning of their first work contract with the City (N  
54  
55 = 22,576) between 04/06/2004 and 04/19/2013. The selection of this age group was based on the  
56  
57 Eurostat definition of young employees ,and on previous studies investigating the occurrence of  
58  
59  
60

1  
2  
3 illness and sickness absence in employees of different ages [22, 23]. For each employee the follow-  
4  
5 up started from their initial recruitment. Employees with incomplete data on occupational position  
6  
7 (n= 754) and those with employment record for less than four years (n= 12,512) were excluded  
8  
9  
10 from the present study and we ended up with a sample size of n = 9,762. We excluded employees  
11  
12 with less than four years of employment history, defined as being employed four years from the  
13  
14 initial recruitment and at least 180 days of employment for each year after the recruitment, as we  
15  
16 needed a long enough follow-up time to observe potential development trajectories. The descriptive  
17  
18 characteristics of excluded subjects are found in web-appendixes 1 and 2. The length of the follow-  
19  
20 up was measured as calendar days in employment.  
21  
22

23  
24 The outcome of the study was OHS utilization trajectory. The OHS primary care services offered to  
25  
26 the employees have remained same during the whole study period. The trajectory, i.e. the  
27  
28 developmental course of OHS utilization, was measured from four consecutive data points  
29  
30 indicating annual number of outpatient primary care visits for each employee. The number of visits  
31  
32 ranged from 0 to 103. The demographic and socioeconomic variables used to predict the outcome  
33  
34 were age, first language, educational level and occupational class. The analyses were stratified by  
35  
36 gender.  
37  
38  
39

40  
41 We used four occupational class groups. Based on the socioeconomic classification of Statistics  
42  
43 Finland and the occupational classification of the City of Helsinki [4,12], non-manual employees  
44  
45 were divided into three groups based on skills requirements and supervisory status: Managers and  
46  
47 professionals, semi-professionals, and routine non-manual employees. Managers have subordinates  
48  
49 and they do managerial or administrative work, whereas professionals include employees with a  
50  
51 university degree, such as physicians and teachers. Semi-professionals include occupations such as  
52  
53 registered nurses and technicians. Routine non-manual employees include clerical employees and  
54  
55 lesser-educated occupations particularly within the social and health care, such as child-minders and  
56  
57  
58  
59  
60



1  
2  
3 care workers. The fourth occupational class, manual workers, include occupations for example from  
4  
5 the fields of cleaning, kitchen work and public transport.  
6  
7

8 Age was measured at the beginning of the follow-up and was categorized into three groups: 20-24,  
9  
10 25-29 and 30-34-year-olds. First language was categorized as: Finnish, Swedish, Other. Education  
11  
12 was classified into three levels: higher education (a master's or a doctoral degree), upper secondary  
13  
14 (a Bachelor's degree), and lower secondary (upper-secondary school, vocational school) or basic  
15  
16 education (comprehensive school).  
17  
18

19  
20 The employer's personnel and occupational health care registers were used to obtain socio-  
21  
22 demographic characteristics and information on OHS use. Educational level was obtained from  
23  
24 annually updated Statistics Finland's registry of completed education and degrees, and was linked  
25  
26 to the City of Helsinki personnel register.  
27  
28

### 29 30 *Ethics*

31  
32  
33 The study follows the Helsinki Health Study protocol in line with the University of Helsinki's  
34  
35 guidelines and data legislation. The ethics committees of the Department of Public Health, the  
36  
37 University of Helsinki and the health authorities of the City of Helsinki have approved the HHS  
38  
39 study. The City of Helsinki has given permission for data linkage.  
40  
41  
42  
43  
44  
45

### 46 *Patient and Public Involvement statement*

47  
48  
49 No Patient or Public Involvement.  
50  
51

### 52 *Statistical methods*

53  
54  
55 Group-based trajectory modeling (GBTM) with Stata's *traj* command [24] was applied to identify  
56  
57 clusters of individuals, or trajectory groups, with similar developmental trajectory on OHS  
58  
59 utilization. The method assigns a subject to a trajectory group by assessing the probability of group  
60

1  
2  
3 membership. The count variables were assumed to be Poisson-distributed and zero inflated Poisson  
4  
5 models were applied. The ideal number of trajectory groups and trajectory shapes were assessed by  
6  
7 four criteria suggested by the existing literature: Bayesian information criteria (BIC), posterior  
8  
9 probabilities of trajectory group membership higher than .70, sizes of trajectory groups larger than  
10  
11 5% and a distinct interpretability of the identified trajectory groups [25,26]. Subsequently,  
12  
13 multinomial logistic regression models using Stata's *mlogit* command were applied to investigate  
14  
15 the role of occupational class as a predictor of the trajectory group membership. In a two-step-  
16  
17 analysis, estimates are given for occupational class, first, adjusted for age and first language and,  
18  
19 second, additionally adjusted for education. In the analyses, the trajectory-group membership is  
20  
21 treated as the outcome, where the trajectory cluster indicating the lowest health care utilization was  
22  
23 defined as the reference group and the other trajectories get the value 1 in each respective analyses.  
24  
25 The results are given as relative risk ratios (RRRs) with their 95% confidence intervals (CIs). All  
26  
27 statistical analyses were performed with Stata 15.  
28  
29  
30  
31  
32  
33  
34  
35  
36

## 37 **Results**

### 38 *Descriptive results*

39  
40  
41  
42 The study sample included 9762 the City of Helsinki employees aged between 20 and 34 at the  
43  
44 beginning of the follow-up. 73%% of the employees were women. Among men, the yearly average  
45  
46 of OHS visits was 1.03 (SD, 1.44) during the mean of 1341 days of follow-up. Among women, the  
47  
48 yearly average was 1.16 (SD, 1.50) OHS visits in the mean of 1328 days. Of the subjects of the  
49  
50 study, 2272 (23%) were managers or professionals, 1824 (19%) semi-professionals, 4064 (42%)  
51  
52 routine non-manual workers, and 1602 (16%) manual workers (Tables 1-2). Managers/professionals  
53  
54 had an equal gender distribution, semi-professionals and routine non-manual workers were more  
55  
56  
57  
58  
59  
60

1  
2  
3 often women, whereas men constituted the majority of manual workers. Occupational class was  
4  
5 closely linked to educational attainment in both genders.  
6  
7

8 In trajectory analysis, a trajectory model consisting of four distinct trajectories including 1  
9  
10 trajectory with a linear, 1 with a quadratic, and 2 with a cubic shape showed the best fit using the  
11  
12 BIC criterion (Figure 1). The largest identified trajectory group “No visits” (n = 5,106, 50%)  
13  
14 represents those with less than 0.2 annual OHS visits over the four years of follow-up. There were  
15  
16 two intermediate groups. The group labeled “Low/increasing” (n = 1,744, 18%) is characterized by  
17  
18 low number of visits during the first two years followed by a slight increase in visits during the next  
19  
20 two years. The group “Low/decreasing” (n = 2,238, 22%) follows a similar pattern as the group 2,  
21  
22 but in a reverse order. The members of the both low groups averaged 1.5 annual OHS visits during  
23  
24 the follow-up. The “High/recurrent” group (n = 976, 10%) consists of employees characterized by  
25  
26 high levels of OHS visits, with an average of 4.6 visits per year, from the start of the employment to  
27  
28 the end of the follow-up. The mean assignment probabilities were 0.93 for the “No visits”, 0.81 for  
29  
30 the “Low/increasing”, 0.82 for the “Low/decreasing”, and 0.92 for the “High/recurrent” trajectory  
31  
32 groups, indicating a good model fit to the data. Of men, 54% belonged to the “No visits” trajectory  
33  
34 and 8.4% to the “High/recurrent” trajectory group, whereas the corresponding figures for women  
35  
36 were 50% and 10%, indicating a higher propensity for women to belong to the “High/recurrent”  
37  
38 trajectory group. The assignment of the members of different occupational classes to different OHS  
39  
40 trajectories followed the socio-economic gradient. Of managers or professionals, 59% belonged to  
41  
42 the “No visits” trajectory and 5% to the “High/recurrent” trajectory. The corresponding figures for  
43  
44 semi-professionals were 48% and 10%, for routine non-manual workers 48% and 11%, and for  
45  
46 manual workers 49% and 13%, respectively.  
47  
48  
49  
50  
51  
52  
53  
54  
55  
56  
57

58 \*\*\* Figure 1 \*\*\*  
59  
60

1  
2  
3 \*\*\* Table 1 \*\*\*  
4  
5

6 \*\*\* Table 2 \*\*\*  
7  
8  
9  
10  
11

### 12 *OHS utilization trajectories by occupational class*

13  
14

15 Occupational class was a strong independent predictor for the OHS utilization trajectories, as  
16 demonstrated in Table 3. The likelihood of belonging to the “High/recurrent” trajectory was  
17 increased for those being in a lower occupational classes when compared to the employees in  
18 managerial or professional positions. For both women and men, the risk for belonging to the  
19 “High/recurrent” trajectory was highest for manual workers, followed by routine non-manual  
20 workers and semi-professionals.  
21  
22  
23  
24  
25  
26  
27

28  
29 The independent effect of occupational class remained after adjustment for all covariates including  
30 age, first language and education. The association was most evident in the “High/recurrent”  
31 trajectory. The relative risk for this group membership was 2.92 (95% CI, 1.48 – 5.74) for male  
32 routine non-manual workers and 3.56 (95% CI, 1.83 – 6.92) for male manual workers. The  
33 corresponding figures for women were 2.28 (95% CI, 1.65 – 3.15) and 2.71 (95% CI, 1.85 – 3.97),  
34 respectively. The results indicate that a proportion of the association between occupational class and  
35 belonging to the “High/recurrent” trajectory is dependent on the lower educational attainment of the  
36 members of the lower occupational classes. The results comparing the two low trajectories with the  
37 “No visits” OHS trajectory were less clear in terms of statistical significance. Whereas all estimates  
38 but one in “Low/decreasing” vs “No visits” comparison remained statistically significant after full  
39 adjustment, four out of “Low/increasing” vs “No visits” comparisons become statistically non-  
40 significant in the final model. The observed excess risks generated by occupational class were thus  
41 smaller in both “Low” trajectories compared to “High/recurrent” trajectory. Notably, the relative  
42  
43  
44  
45  
46  
47  
48  
49  
50  
51  
52  
53  
54  
55  
56  
57  
58  
59  
60

1  
2  
3 risks related to the membership of these middle trajectories were not manifested in a dose-exposure  
4  
5 manner as was the case with the “High/recurrent” trajectory.  
6  
7  
8  
9

10  
11 \*\*\* Table 3 \*\*\*  
12  
13  
14  
15  
16

### 17 *Sensitivity analyses*

18  
19  
20 To assess the extent the parameter estimates were sensitive to potential errors in model specification  
21  
22 and data, four types of sensitivity analyses were performed. First, we reproduced estimates from the  
23  
24 original data with bootstrap resampling (1000 replications). Second, we reproduced the results with  
25  
26 logistic regression analyses defining the high-utilization group as those whose total number of OHS  
27  
28 visits during the follow-up period was 10 or more (n=1,484) was compared with those with no or  
29  
30 just one visit (n= 3,993). Third, we ran the analysis with reversed class order in order to identify  
31  
32 whether semi-professionals were less likely to be in the high trajectory group compared to routine  
33  
34 workers (web-appendix 3). These sensitivity analyses indicated robustness of our inference about  
35  
36 the relationship between occupational class and OHS utilization trajectories. Fourth, we performed  
37  
38 a sensitivity analysis where variables on part-time work and fixed-term contract were included, but  
39  
40 they changed the estimates only modestly (data not shown).  
41  
42  
43  
44  
45  
46  
47  
48

### 49 **Discussion**

50  
51  
52 In this study we identified developmental trajectories and socioeconomic differences in OHS  
53  
54 primary care service utilization among 20 to 34-year-old employees of the City of Helsinki from  
55  
56 2004 to 2017. Our key results were: 1) Half of the young employees did not use OHS to any  
57  
58 considerable extent; 2) Higher occupational classes utilized less OHS; 3) Four trajectory groups,  
59  
60

1  
2  
3 that is, “No visits”, ”Low/increasing”, “Low/decreasing” and “High/recurrent”, were identified. 4)  
4  
5 The trajectory group of “High/recurrent” included a larger number of lower class workers especially  
6  
7 among men, and the differences were large also among women. 5) Occupational class differences in  
8  
9 “Low/decreasing” group were evident in both genders. 6) Only in women there were some  
10  
11 occupational class differences in belonging to the trajectory group of “Low-increasing OHS  
12  
13 utilization”.

14  
15  
16  
17 Our results highlight the significance of socioeconomic gradient in OHS utilization that was visible  
18  
19 both in men and women. The percentage of those who had no visits was the highest among  
20  
21 managers and professionals and the proportion of no visits decreased when going down the  
22  
23 occupational class ladder. Respectively, high and recurrent use was smallest among managers and  
24  
25 professionals, and increased with decreasing occupational class, this type of use being the most  
26  
27 common among manual workers. A larger proportion of men had no visits at all in each  
28  
29 occupational class, thus the women used the health services more, in line with earlier findings [2].  
30  
31 In a similar way, the high and recurrent use was higher among women than among men. In the  
32  
33 present context, primary care visits can be interpreted as an indicator of incidence of acute illnesses,  
34  
35 as the Finnish OHS system distinguish visits related to occupational health hazards. The present  
36  
37 results concerning primary care visits are in line with previous findings from our own and other  
38  
39 studies showing the socioeconomic differences in sickness absence among employees and the  
40  
41 gender differences in sickness absence, i.e. women having more absence than men [7,10,14,18,21].  
42  
43 It can be assumed that large number of OHS visits precede sickness absence. [27].  
44  
45  
46  
47  
48  
49

50 Stratified analyses indicated gender differences in OHS utilization. According to our results, among  
51  
52 men the occupational class differences disappeared after full adjustment in the trajectory group of  
53  
54 “Low/increasing”. This implies that the initial differences are associated with the type of work  
55  
56 tasks. In contrast, after full adjustment, among women the employees in the two lowest  
57  
58 occupational classes had a higher risk for belonging to this trajectory group. In the trajectory group  
59  
60

1  
2  
3 of “Low/decreasing” the differences were initially similar among the three lowest occupational  
4  
5 classes. However, the differences modestly increased after full adjustment, implying that there are  
6  
7 several factors associated with the low OHS utilization. This was seen among both genders.  
8  
9

10 The trajectory group of “High/recurrent” is perhaps the most interesting group alongside with the  
11  
12 “Low/increasing” group in terms of costs and possible preventive opportunities. According to our  
13  
14 results the occupational class differences in this group are steep especially among men, and also  
15  
16 large among women. After full adjustment the differences decreased more in men, suggesting that  
17  
18 the initial differences are more associated with work tasks among them. However, the differences  
19  
20 remained high in both genders after adjustments. Studies regarding socioeconomic differences in  
21  
22 sickness absence have also found that the differences are steeper among men [7,17,18], but the  
23  
24 former studies mostly concentrate on older employees.  
25  
26  
27

28  
29 The differences in physical and psychosocial demands between occupational classes are important  
30  
31 to take into account when interpreting the results. Manual workers have more physically demanding  
32  
33 jobs, which may affect their need for primary care services. Adverse working conditions may cause  
34  
35 ill-health and need of health services as milder even health difficulties may prevent these employees  
36  
37 from working. Employees in higher occupational classes typically have more complex and mentally  
38  
39 demanding jobs [28]. In studies examining the socioeconomic differences in sickness absence,  
40  
41 physical working conditions have been found to be the strongest explanatory factor [12,16].  
42  
43

44  
45 However, employees in our study are fairly young and thus adverse physical or psychosocial  
46  
47 working conditions might not have yet affected their health, as health-related effects usually  
48  
49 increase with age. In addition, the unique OHS system where the visits associated with occupational  
50  
51 health hazards (preventive services) are recorded separately from primary care visits may contribute  
52  
53 to the differences seen in our results. For example visits with more chronic work-related reason are  
54  
55 usually not recorded as primary care visits. Thus, the overall utilization of OHS requires further  
56  
57 research.  
58  
59  
60

1  
2  
3 Our study indicates that service use patterns might recognize vulnerable groups more precisely than  
4 just belonging to certain occupation or occupational class may do. Despite this, the two lowest  
5 occupational classes may need extra attention based on their OHS utilization patterns. Case  
6 management protocols are essential in coordinating patient-centered care path which also saves  
7 costs [8,9,29]. Among younger employees, timely treatment is highly important, as it might prevent  
8 the worsening of their condition. OHS should identify those employees who use services a lot.

9  
10 Previous longitudinal studies using OHS data are lacking, but recent studies have showed that  
11 frequent utilization of OHS was associated with psychiatric problems and musculoskeletal disorders  
12 [2], whereas the latter also predicts persistent frequent utilization [30]. Furthermore, frequent  
13 utilization has increased the risk of long sickness absence [31] and disability pension [32]. These  
14 associations highlight the need of identifying those in risk for more severe illness and work  
15 disability at an early stage, and information on the different utilization trajectories with identified  
16 occupational class differences supports these preventive actions. Moreover, some comparisons can  
17 be made with the studies investigating frequent attenders in primary care. Frequent attenders in  
18 primary care in the general population have been studied particularly in Netherlands and in Sweden  
19 using questionnaire surveys and record linkage. These studies had participants from a wide range of  
20 sociodemographic backgrounds and they consider only visits to general practitioners, thus their  
21 direct comparability to OHS utilization is difficult. In addition, the definition of frequent attender  
22 varies between studies [33]. However, previous studies have found out that frequent attenders have  
23 multiple reasons for presenting [34], but overall chronic illnesses [33], somatic diseases and  
24 symptoms [35,36] and especially psychiatric problems [35] have been associated with more  
25 frequent primary care service use. Frequent attenders have more health discomfort, low mastery,  
26 and they may be more vulnerable for stressful life events due to inadequate coping strategies  
27 [27,37,38]. In line with the study by Reho et al. [31,32], frequent attenders are a high-risk group for  
28 long-term sickness absence and disability pension [27]. According to two previous Dutch studies  
29  
30  
31  
32  
33  
34  
35  
36  
37  
38  
39  
40  
41  
42  
43  
44  
45  
46  
47  
48  
49  
50  
51  
52  
53  
54  
55  
56  
57  
58  
59  
60



1  
2  
3 one out of every seven 1-year frequent attenders becomes persistent frequent attender and six out of  
4 seven are transient frequent attenders [35,39]. Based on this previous evidence the inclusion of  
5 diagnostic information would be important in future studies of OHS utilization. However, from the  
6 methodological viewpoint both the Dutch and Swedish research groups point out that age should be  
7 taken into account when studying the frequent attenders, as not only the reasons for high service  
8 utilization but also what constitutes high use highly differ by age group [36,40].  
9

### 17 *Methodological considerations*

20 The registers used in this study are reliable and comprehensive. We focused on all occupational  
21 groups within the largest employer in Finland and the sample consisted all of 20-34-year-old  
22 employees within this organization. The occupational health care policies are same for all these  
23 employees and have remained same during the study period of 2004-2017. Our study avoids a  
24 common limitation of OHS studies that are based on limited samples with data on only those  
25 attending the service (e.g. [2]) or those responding to survey [3]. Another advantage of this study is  
26 that we could make inferences based on longitudinal cohort data instead of relying on cross-  
27 sectional evidence. Limitations of the data include the lack of information of diagnoses, physical  
28 and psychosocial working conditions, lifestyle factors and any primary care visits outside the OHS.  
29 Unfortunately, our data does not extend beyond the employees' current employment contracts. In  
30 addition, people with initial poor health may attain lower educational level and end up in lower  
31 occupational positions. Moreover, excluding those with employment record for less than four years  
32 (n= 12,512) due to the need of long enough follow-up time reduced particularly the number of  
33 youngest employees (web-appendixes 1 and 2). A further limitation is that the initial occupational  
34 classes might have changed during the follow-up for due to promotion or other changes in the  
35 employment.  
36  
37  
38  
39  
40  
41  
42  
43  
44  
45  
46  
47  
48  
49  
50  
51  
52  
53  
54  
55  
56  
57

58 The OHS system in Finland is unique, thus comparison to other countries is difficult. The principle  
59 of primary care use is similar as in the general practice (GP) or family doctor setting in most other  
60

1  
2  
3 Western countries, but the patient population differs to some extent from ours in terms of  
4 demographics and employment status. In Finland, the employer offers (most employers do) those  
5 services and thus OHS is the main source for primary care for employees due to being free at the  
6 point of delivery and enabling an easy access. However, even within Finland, different employers  
7 can have different policies in terms of provision of primary care services. Nevertheless, our results  
8 can be broadly generalized to Finnish public sector employees.  
9

10  
11 The present study is to our knowledge the first one that used longitudinal latent class analysis  
12 aiming to capture OHS utilization as a complex longitudinal phenomenon. GBTM approach mixes  
13 the application of formal statistical criteria and subjective evaluation in model fitting [24]. One of  
14 its strength is that it allowed us to identify high OHS utilization over time. It is a limitation that  
15 those who left the City of Helsinki within the first four years of their employment were lost to  
16 follow-up. Another benefit is that GBTM is capable of identifying different OHS trajectories within  
17 subjects that appear similar in terms of summary statistics. In this study we were able to distinguish  
18 between two “low” trajectories, which may allow for better planning of targeted prevention  
19 measures. However, we want to highlight that by this methodology it cannot be ascertained that the  
20 observed subgroups are distinct population subgroups. As in case of any latent trajectory class  
21 analyses, there is a possibility that the data could be interpreted as homogenous but non-normal  
22 [41]. We find, however, the obtained groups to be realistic and the results applicable in terms of  
23 real-life interpretations. However, further analysis with longer follow-up would be important to  
24 confirm the trajectories found.  
25  
26  
27  
28  
29  
30  
31  
32  
33  
34  
35  
36  
37  
38  
39  
40  
41  
42  
43  
44  
45  
46  
47  
48  
49  
50  
51  
52

### 53 **Conclusions**

54  
55  
56 We used GBTM for distinguishing four different developmental trajectories in OHS primary care  
57 service utilization among 20-34-year-old employees of the City of Helsinki. We found that  
58  
59  
60

1  
2  
3 occupational class differences exist in the utilization development trajectories. A large proportion of  
4  
5 the young employees do not use OHS primary care services and non-use is the most common  
6  
7 among the highest occupational class. Especially trajectories where the utilization has grown or  
8  
9 been high throughout the follow-up had large occupational class differences, which followed the  
10  
11 socioeconomic gradient. Identifying high utilization patterns is important as ten per cent of  
12  
13 employees that may be labeled high and recurrent users account for 40% of the all OHS  
14  
15 consultations.  
16  
17  
18  
19

20 Our results show several important points for policy makers, as well as occupational and primary  
21  
22 health care personnel, not only in Finland but also in countries with different primary care and  
23  
24 occupational health care systems. According to our results preventive measures should be  
25  
26 considered particularly among the trajectory groups of “Low/increasing” and “High/recurrent”  
27  
28 health care utilization. In addition, special attention should be paid to the lowest occupational  
29  
30 classes, and their OHS utilization should be closely monitored by the occupational health  
31  
32 care/primary care in order to identify those in need for extra support. Case management protocols  
33  
34 should be further developed and resources targeted in order to develop and maintain the health care  
35  
36 system where early support is been given to those identified being in risk for subsequent work  
37  
38 disability. As the preventive measures are done in practice, research should follow their success and  
39  
40 produce evidence based development suggestions. In addition, OHS and primary care utilization  
41  
42 requires more longitudinal research in order to target resources and preventive measures.  
43  
44  
45  
46  
47  
48  
49  
50  
51  
52  
53  
54  
55  
56  
57  
58  
59  
60

### Author contributions

HS, AK & JH designed the study. HS mainly wrote the manuscript with contributions and comments from all the other authors (JH, KP, OP, OR & AK), JH did the statistical analyses and wrote the results section and OP commented those. All the authors have approved the final version of the manuscript.

### Conflicts of Interest

Authors declare no conflicts of interest.

### Funding

This study was funded by the Finnish Work Environment Fund (grant 117321) and the Academy of Finland (grant 315343). AK was funded by the Economic and Social Research Council (ESRC) (grant ES/L007509/1 and ES/S00744X/1). OR was funded by the Academy of Finland (grant 1294514). The funders had no involvement to the preparation of the manuscript.

### Data sharing statement

Data cannot be shared publicly because it contains confidential medical information and the study participants have not given their permission to data sharing. Data are kept at the University of Helsinki computers and are available upon agreement with the Helsinki Health Study for researchers who meet the criteria for access to confidential data.

## References

1. Kelasto-reports. 2019. Kelan työterveyshuoltotilasto 2017 (in Finnish). Official statistics of Finland. [https://helda.helsinki.fi/bitstream/handle/10138/303534/Kelan\\_tyoterveyshuoltotilasto\\_2017.pdf?sequence=1&isAllowed=y](https://helda.helsinki.fi/bitstream/handle/10138/303534/Kelan_tyoterveyshuoltotilasto_2017.pdf?sequence=1&isAllowed=y). (Accessed 6 Aug 2019).
2. Reho T, Atkins S, Talola N, Viljamaa M, Sumanen M, Uitti J. Frequent attenders in occupational health primary care: A cross-sectional study. *Scand J Public Health* 2018;1:1403494818777436.
3. Kimanen A, Rautio M, Manninen P, Räsänen K, Husman P, Husman K. Primary care visits to occupational health physicians and nurses in Finland. *Scand J Public Health* 2011;39:525-32.
4. Lahelma E, Aittomäki A, Laaksonen M, Lallukka T, Martikainen P, Piha K, et al. Cohort Profile: The Helsinki Health Study. *Int J Epidemiol* 2013;42:722–30.
5. Sumanen H, Pietiläinen O, Lahti J, Lahelma E, Rahkonen O. Sickness absence among young employees: trends from 2002 to 2013. *J Occup Health* 2015;57:474-81.
6. Sumanen H, Lahelma E, Lahti J, Pietiläinen O, Rahkonen O. Educational differences in sickness absence trends among young employees from 2002 to 2013 in Helsinki, Finland. *BMJ Open* 2016; 6:e008550.
7. Sumanen H, Lahelma E, Pietiläinen O, Rahkonen O. The Magnitude of Occupational Class Differences in Sickness Absence: 15-Year Trends among Young and Middle-Aged Municipal Employees. *Int J Environ Res Public Health* 2017;14:E625.
8. AAOHN. Case Management: The Occupational and Environmental Health Nurse Role. *Workplace Health Saf* 2013;61:8.
9. Robinson M, Fisher TF, Broussard K. Role of Occupational Therapy in Case Management and Care Coordination for Clients With Complex Conditions. *Am J Occup Ther* 2016;70:7002090010p1-7002090010p6.

10. Piha K, Laaksonen M, Martikainen P, Rahkonen O, Lahelma E. Interrelationships between education, occupational class, income and sickness absence. *Eur J Public Health* 2010;20:276-80.
11. Piha K, Martikainen P, Rahkonen O, Roos E, Lahelma E. Trends in socioeconomic differences in sickness absence among Finnish municipal employees 1990-99. *Scand J Public Health* 2007;35:348-55.
12. Laaksonen M, Piha K, Rahkonen O, Martikainen P, Lahelma E. Explaining occupational class differences in sickness absence: Results from middle-aged municipal employees. *J Epidemiol Community Health* 2010;64:802-7.
13. Sumanen H, Pietiläinen O, Lahti J, Lahelma E, Rahkonen O. Interrelationships between education, occupational class and income as determinants of sickness absence among young employees in 2002-2007 and 2008-2013. *BMC Public Health* 2015;15:332.
14. Pekkala J, Blomgren J, Pietiläinen O, Lahelma E, Rahkonen O. Occupational class differences in diagnostic-specific sickness absence: A register-based study in the Finnish population. *BMC Public Health* 2017;17:670.
15. Feeney A, North F, Head J, Canner R, Marmot M. Socioeconomic and sex differentials in reason for sickness absence from the Whitehall II study. *Occup Environ Med* 1998;55:91-8.
16. Christensen K, Labriola M, Lund T, Kivimäki M. Explaining the social gradient in long-term sickness absence: A prospective study of Danish employees. *J Epidemiol Community Health* 2008;62:181-3.
17. Hansen H, Ingebrigtsen T. Social class and sickness absence in Norway. *Acta Sociologica* 2008;51:309-27.
18. Löve J, Hensing G, Holmgren K, Toren K. Explaining the social gradient in sickness absence: A study of a general working population in Sweden. *BMC Public Health* 2013;13:545-2458-13-545.

- 1  
2  
3 19. Vahtera J, Virtanen P, Kivimäki M, Pentti J. Workplace as an origin of health inequalities. *J*  
4  
5 *Epidemiol Community Health* 1999;53:399-407.  
6  
7  
8 20. Morikawa Y, Martikainen P, Head J, Marmot M, Ishizaki M, Nakagawa H. A comparison of  
9  
10 socio-economic differences in long-term sickness absence in a Japanese cohort and a British cohort  
11  
12 of employed men. *Eur J Public Health* 2004;14:413-6.  
13  
14  
15 21. Kaikkonen R, Härkönen T, Rahkonen O, Gould R, Koskinen S. Explaining educational  
16  
17 differences in sickness absence: a population-based follow-up study. *Scand J Work Environ Health*  
18  
19 2015;41:338-46.  
20  
21  
22 22. Sumanen H. Work disability among young employees: Changes over time and socioeconomic  
23  
24 differences. *Dissertationes Scholae Doctoralis Ad Sanitatem Investigandam Universitatis*  
25  
26 *Helsinkiensis*; nro 18/2016.  
27  
28  
29 23. Eurostat. 2019. Participation of Young People in Education and the Labour Market.  
30  
31 [https://ec.europa.eu/eurostat/statistics-](https://ec.europa.eu/eurostat/statistics-explained/index.php?title=Participation_of_young_people_in_education_and_the_labour_market&oldid=433402#Participation_of_young_persons_in_formal_education_and_in_the_labour_market)  
32  
33 [explained/index.php?title=Participation\\_of\\_young\\_people\\_in\\_education\\_and\\_the\\_labour\\_market&](https://ec.europa.eu/eurostat/statistics-explained/index.php?title=Participation_of_young_people_in_education_and_the_labour_market&oldid=433402#Participation_of_young_persons_in_formal_education_and_in_the_labour_market)  
34  
35 [oldid=433402#Participation\\_of\\_young\\_persons\\_in\\_formal\\_education\\_and\\_in\\_the\\_labour\\_market.](https://ec.europa.eu/eurostat/statistics-explained/index.php?title=Participation_of_young_people_in_education_and_the_labour_market&oldid=433402#Participation_of_young_persons_in_formal_education_and_in_the_labour_market)  
36  
37  
38 (Accessed 6 Aug 2019)  
39  
40  
41  
42 24. Jones BL, Nagin DS. 2012. A Stata Plugin for Estimating Group-Based Trajectory Models.  
43  
44 [https://ssrc.indiana.edu/doc/wimdocs/2013-03-29\\_nagin\\_trajectory\\_stata-plugin-info.pdf](https://ssrc.indiana.edu/doc/wimdocs/2013-03-29_nagin_trajectory_stata-plugin-info.pdf) (accessed  
45  
46 1 Jun 2018)  
47  
48  
49 25. Nagin D. 2005. *Group-Based Modeling of Development*. Cambridge, Mass: Harvard University  
50  
51 Press.  
52  
53  
54 26. Nagin DS, Odgers CL. Group-Based Trajectory Modeling in Clinical Research. *Annu Rev Clin*  
55  
56 *Psychol* 2010;6:109–38.  
57  
58  
59  
60

- 1  
2  
3 27. Bergh H, Baigi A, Månsson J, Mattsson B, Marklund B. Predictive factors for long-term sick  
4  
5 leave and disability pension among frequent and normal attenders in primary health care over 5  
6  
7 years. *Public Health* 2007;121:25-33.  
8  
9  
10 28. Nieuwenhuijsen K, Verbeek JH, de Boer AG, Blonk RW, van Dijk FJ: Predicting the duration  
11  
12 of sickness absence for patients with common mental disorders in occupational health care. *Scand J*  
13  
14 *Work Environ Health* 2006;32:67-74.  
15  
16  
17 29. Golden R. The importance of collaboration. *CMSA Today* 2015;4:21-2.  
18  
19  
20 30. Reho T, Atkins S, Talola N, Sumanen M, Viljamaa M, Uitti J. Comparing occasional and  
21  
22 persistent frequent attenders in occupational health primary care - a longitudinal study. *BMC Public*  
23  
24 *Health* 2018;26:1291.  
25  
26  
27 31. Reho TTM, Atkins SA, Talola N, Sumanen MPT, Viljamaa M, Uitti J. Occasional and  
28  
29 persistent frequent attenders and sickness absences in occupational health primary care: a  
30  
31 longitudinal study in Finland. *BMJ Open* 2019;19:e024980.  
32  
33  
34 32. Reho TTM, Atkins SA, Talola N, Sumanen MPT, Viljamaa M, Uitti J. Frequent attenders at risk  
35  
36 of disability pension: a longitudinal study combining routine and register data. *Scand J Public*  
37  
38 *Health* 2019;11:1403494819838663.  
39  
40  
41 33. Vedsted P, Christensen MB. Frequent attenders in general practice care: a literature review with  
42  
43 special reference to methodological considerations. *Public Health* 2005;119:118-37.  
44  
45  
46 34. Smits FT, Brouwer HJ, Schene AH, van Weert HC, Ter Riet G. Is frequent attendance of longer  
47  
48 duration related to less transient episodes of care? A retrospective analysis of transient and chronic  
49  
50 episodes of care. *BMJ Open* 2016;6:e012563.  
51  
52  
53  
54  
55  
56  
57  
58  
59  
60



- 1  
2  
3 35. Smits FT, Brouwer HJ, ter Riet G, van Weert HC. Epidemiology of frequent attenders: a 3-year  
4 historic cohort study comparing attendance, morbidity and prescriptions of one-year and persistent  
5 frequent attenders. *BMC Public Health* 2009;9:36.  
6  
7  
8  
9  
10 36. Bergh H, Marklund B. Characteristics of frequent attenders in different age and sex groups in  
11 primary health care. *Scand J Prim Health Care* 2003;21:171-7.  
12  
13  
14  
15 37. Bergh H, Baigi A, Fridlund B, Marklund B. Life events, social support and sense of coherence  
16 among frequent attenders in primary health care. *Public Health* 2006;120:229-36.  
17  
18  
19  
20 38. Smits FT, Brouwer HJ, Zwinderman AH, Mohrs J, Schene AH, van Weert HC, ter Riet G. Why  
21 do they keep coming back? Psychosocial etiology of persistence of frequent attendance in primary  
22 care: a prospective cohort study. *J Psychosom Res* 2014;77:492-503.  
23  
24  
25  
26  
27  
28 39. Smits FT, Brouwer HJ, van Weert HC, Schene AH, ter Riet G. Predictability of persistent  
29 frequent attendance: a historic 3-year cohort study. *Br J Gen Pract* 2009;59:e44-50.  
30  
31  
32  
33 40. Smits FT, Mohrs JJ, Beem EE, Bindels PJ, van Weert HC. Defining frequent attendance in  
34 general practice. *BMC Fam Pract*.2008;15:21.  
35  
36  
37  
38  
39 41. Bauer DJ, Curran PJ. Distributional Assumptions of Growth Mixture Models: Implications for  
40 Overextraction of Latent Trajectory Classes. *Psychological Methods* 2003;8:338-63.  
41  
42  
43  
44  
45  
46  
47  
48  
49  
50  
51  
52  
53  
54  
55  
56  
57  
58  
59  
60

Table 1. Descriptive statistics of the four occupational classes among 2,454 male The City of Helsinki employees aged 20-34 years. Results are based on register data covering the years from 2004 to 2017.

|                                                    | Total           |           |              |              | Occupational class                   |           |                                |           |                                        |           |                       |           |
|----------------------------------------------------|-----------------|-----------|--------------|--------------|--------------------------------------|-----------|--------------------------------|-----------|----------------------------------------|-----------|-----------------------|-----------|
|                                                    | OHS visits p.a. |           | 1 / 1<br>000 |              | <i>Managers or<br/>professionals</i> |           | <i>Semi-<br/>professionals</i> |           | <i>Routine non-<br/>manual workers</i> |           | <i>Manual workers</i> |           |
|                                                    | N               | % / (sd.) | N            | 1 / 1<br>000 | n                                    | % / (sd.) | n                              | % / (sd.) | n                                      | % / (sd.) | n                     | % / (sd.) |
| <b>Total</b>                                       | 2454            | 100.0     | 2528         | 1030.3       | 594                                  | 100.0     | 286                            | 100.0     | 677                                    | 100.0     | 897                   | 100.0     |
| The length of the follow-up in days, average (sd.) | 1341            | (252)     |              |              | 1371                                 | (204)     | 1382                           | (191)     | 1290                                   | (292)     | 1348                  | (260)     |
| OHS visits per annum, 1 / 1000 (sd.)               | 1030.3          | (1435.3)  |              |              | 705.4                                | (939.4)   | 996.5                          | (1151.3)  | 1121.5                                 | (1482.1)  | 1187.3                | (1695.8)  |
| <b>Outcome: Trajectory group</b>                   |                 |           |              |              |                                      |           |                                |           |                                        |           |                       |           |
| 1. No OHS visits                                   | 1337            | 54.5      | 225          | 168.5        | 374                                  | 63.0      | 148                            | 51.7      | 349                                    | 51.6      | 466                   | 52.0      |
| 2. Low/increasing                                  | 420             | 17.1      | 626          | 1489.3       | 91                                   | 15.3      | 54                             | 18.9      | 131                                    | 19.4      | 144                   | 16.1      |
| 3. Low/decreasing                                  | 496             | 20.2      | 728          | 1468.2       | 113                                  | 19.0      | 63                             | 22.0      | 138                                    | 20.4      | 182                   | 20.3      |
| 4. High/recurrent                                  | 201             | 8.2       | 949          | 4722.6       | 16                                   | 2.7       | 21                             | 7.3       | 59                                     | 8.7       | 105                   | 11.7      |
| <b>Covariates</b>                                  |                 |           |              |              |                                      |           |                                |           |                                        |           |                       |           |
| <b>Age (years)</b>                                 |                 |           |              |              |                                      |           |                                |           |                                        |           |                       |           |
| 20 - 24                                            | 618             | 25.2      | 684          | 1107.2       | 23                                   | 3.9       | 38                             | 13.3      | 221                                    | 32.6      | 336                   | 37.5      |
| 25 - 29                                            | 1077            | 43.9      | 996          | 924.6        | 299                                  | 50.3      | 152                            | 53.1      | 296                                    | 43.7      | 330                   | 36.8      |
| 30 - 34                                            | 759             | 30.9      | 848          | 1117.6       | 272                                  | 45.8      | 96                             | 33.6      | 160                                    | 23.6      | 231                   | 25.8      |
| <b>First language</b>                              |                 |           |              |              |                                      |           |                                |           |                                        |           |                       |           |
| Finnish                                            | 2154            | 87.8      | 2219         | 1029.9       | 499                                  | 84.0      | 272                            | 95.1      | 589                                    | 87.0      | 794                   | 88.5      |

1  
2  
3  
4  
5  
6  
7  
8  
9  
10  
11  
12  
13  
14  
15  
16  
17  
18  
19  
20  
21  
22  
23  
24  
25  
26  
27  
28  
29  
30  
31  
32  
33  
34  
35  
36  
37  
38  
39  
40  
41  
42  
43  
44  
45  
46

|                                   |      |      |      |        |     |      |     |      |     |      |     |      |
|-----------------------------------|------|------|------|--------|-----|------|-----|------|-----|------|-----|------|
| Swedish                           | 81   | 3.3  | 36   | 438.3  | 47  | 7.9  | 2   | 0.7  | 24  | 3.5  | 8   | 0.9  |
| Other                             | 193  | 7.9  | 256  | 1327.7 | 24  | 4.0  | 12  | 4.2  | 62  | 9.2  | 95  | 10.6 |
| <b>Education</b>                  |      |      |      |        |     |      |     |      |     |      |     |      |
| Basic education / Lower secondary | 1595 | 65.0 | 1807 | 1132.8 | 136 | 22.9 | 115 | 40.2 | 530 | 78.3 | 814 | 90.7 |
| Upper secondary                   | 476  | 19.4 | 453  | 951.2  | 126 | 21.2 | 149 | 52.1 | 130 | 19.2 | 71  | 7.9  |
| Higher education                  | 383  | 15.6 | 269  | 701.7  | 332 | 55.9 | 22  | 7.7  | 17  | 2.5  | 12  | 1.3  |

Table 2. Descriptive statistics of the four occupational classes among 7,308 female The City of Helsinki employees aged 20-34 years. Results are based on register data covering the years from 2004 to 2017.

|                                                    | Total           |           |           |           | Occupational class               |           |                           |           |                                   |           |                       |           |
|----------------------------------------------------|-----------------|-----------|-----------|-----------|----------------------------------|-----------|---------------------------|-----------|-----------------------------------|-----------|-----------------------|-----------|
|                                                    | OHS visits p.a. |           | 1 / 1 000 |           | <i>Managers or professionals</i> |           | <i>Semi-professionals</i> |           | <i>Routine non-manual workers</i> |           | <i>Manual workers</i> |           |
|                                                    | N               | % / (sd.) | N         | 1 / 1 000 | n                                | % / (sd.) | n                         | % / (sd.) | n                                 | % / (sd.) | n                     | % / (sd.) |
| <b>Total</b>                                       | 7308            | 100.0     | 8470      | 1158.9    | 1678                             | 100.0     | 1538                      | 100.0     | 3387                              | 100.0     | 705                   | 100.0     |
| The length of the follow-up in days, average (sd.) | 1328            | (254)     |           |           | 1326                             | (244)     | 1375                      | (202)     | 1310                              | (272)     | 1322                  | (281)     |
| OHS visits per annum, 1 / 1000 (sd.)               | 1158.9          | (1499.2)  |           |           | 850.9                            | (1114.0)  | 1141.7                    | (1357.4)  | 1268.7                            | (1627.4)  | 1402.5                | (1808.0)  |
| <b>Outcome: Trajectory group</b>                   |                 |           |           |           |                                  |           |                           |           |                                   |           |                       |           |
| 1. No OHS visits                                   | 3623            | 49.6      | 644       | 177.7     | 972                              | 57.9      | 734                       | 47.7      | 1599                              | 47.2      | 318                   | 45.1      |
| 2. Low/increasing                                  | 1281            | 17.5      | 1922      | 1500.2    | 264                              | 15.7      | 249                       | 16.2      | 627                               | 18.5      | 141                   | 20.0      |
| 3. Low/decreasing                                  | 1651            | 22.6      | 2455      | 1487.0    | 347                              | 20.7      | 397                       | 25.8      | 759                               | 22.4      | 148                   | 21.0      |

|    |                          |      |      |      |        |      |      |      |      |      |      |     |      |
|----|--------------------------|------|------|------|--------|------|------|------|------|------|------|-----|------|
| 1  |                          |      |      |      |        |      |      |      |      |      |      |     |      |
| 2  |                          |      |      |      |        |      |      |      |      |      |      |     |      |
| 3  | 4. High/recurrent        | 753  | 10.3 | 3449 | 4580.3 | 95   | 5.7  | 158  | 10.3 | 402  | 11.9 | 98  | 13.9 |
| 4  |                          |      |      |      |        |      |      |      |      |      |      |     |      |
| 5  | <b><i>Covariates</i></b> |      |      |      |        |      |      |      |      |      |      |     |      |
| 6  |                          |      |      |      |        |      |      |      |      |      |      |     |      |
| 7  | <b>Age</b>               |      |      |      |        |      |      |      |      |      |      |     |      |
| 8  | 20 - 24                  | 2252 | 30.8 | 2693 | 1195.6 | 142  | 8.5  | 443  | 28.8 | 1412 | 41.7 | 255 | 36.2 |
| 9  | 25 - 29                  | 3152 | 43.1 | 3565 | 1130.9 | 959  | 57.2 | 693  | 45.1 | 1233 | 36.4 | 267 | 37.9 |
| 10 | 30 - 34                  | 1904 | 26.1 | 2212 | 1161.9 | 577  | 34.4 | 402  | 26.1 | 742  | 21.9 | 183 | 26.0 |
| 11 |                          |      |      |      |        |      |      |      |      |      |      |     |      |
| 12 | <b>Language</b>          |      |      |      |        |      |      |      |      |      |      |     |      |
| 13 |                          |      |      |      |        |      |      |      |      |      |      |     |      |
| 14 | Finnish                  | 6451 | 88.3 | 7627 | 1182.3 | 1403 | 83.6 | 1422 | 92.5 | 3020 | 89.2 | 606 | 86.0 |
| 15 | Swedish                  | 324  | 4.4  | 307  | 947.5  | 158  | 9.4  | 51   | 3.3  | 109  | 3.2  | 6   | 0.9  |
| 16 | Other                    | 448  | 6.1  | 479  | 1068.6 | 40   | 2.4  | 64   | 4.2  | 252  | 7.4  | 92  | 13.0 |
| 17 |                          |      |      |      |        |      |      |      |      |      |      |     |      |
| 18 | <b>Education</b>         |      |      |      |        |      |      |      |      |      |      |     |      |
| 19 |                          |      |      |      |        |      |      |      |      |      |      |     |      |
| 20 | Basic education / Lower  | 3641 | 49.8 | 4667 | 1281.8 | 273  | 16.3 | 232  | 15.1 | 2541 | 75.0 | 595 | 84.4 |
| 21 | secondary                |      |      |      |        |      |      |      |      |      |      |     |      |
| 22 | Upper secondary          | 2319 | 31.7 | 2565 | 1105.9 | 270  | 16.1 | 1211 | 78.7 | 755  | 22.3 | 83  | 11.8 |
| 23 | Higher education         | 1348 | 18.4 | 1238 | 918.4  | 1135 | 67.6 | 95   | 6.2  | 91   | 2.7  | 27  | 3.8  |
| 24 |                          |      |      |      |        |      |      |      |      |      |      |     |      |
| 25 |                          |      |      |      |        |      |      |      |      |      |      |     |      |
| 26 |                          |      |      |      |        |      |      |      |      |      |      |     |      |
| 27 |                          |      |      |      |        |      |      |      |      |      |      |     |      |
| 28 |                          |      |      |      |        |      |      |      |      |      |      |     |      |
| 29 |                          |      |      |      |        |      |      |      |      |      |      |     |      |
| 30 |                          |      |      |      |        |      |      |      |      |      |      |     |      |
| 31 |                          |      |      |      |        |      |      |      |      |      |      |     |      |
| 32 |                          |      |      |      |        |      |      |      |      |      |      |     |      |
| 33 |                          |      |      |      |        |      |      |      |      |      |      |     |      |
| 34 |                          |      |      |      |        |      |      |      |      |      |      |     |      |
| 35 |                          |      |      |      |        |      |      |      |      |      |      |     |      |
| 36 |                          |      |      |      |        |      |      |      |      |      |      |     |      |
| 37 |                          |      |      |      |        |      |      |      |      |      |      |     |      |
| 38 |                          |      |      |      |        |      |      |      |      |      |      |     |      |
| 39 |                          |      |      |      |        |      |      |      |      |      |      |     |      |
| 40 |                          |      |      |      |        |      |      |      |      |      |      |     |      |
| 41 |                          |      |      |      |        |      |      |      |      |      |      |     |      |
| 42 |                          |      |      |      |        |      |      |      |      |      |      |     |      |
| 43 |                          |      |      |      |        |      |      |      |      |      |      |     |      |
| 44 |                          |      |      |      |        |      |      |      |      |      |      |     |      |
| 45 |                          |      |      |      |        |      |      |      |      |      |      |     |      |
| 46 |                          |      |      |      |        |      |      |      |      |      |      |     |      |

Table 3. Multinomial logistic regression on occupational class as a determinant of occupational health service (OHS) trajectories among 9762 City of Helsinki employees aged 20-34 years. Results are based on register data covering the years from 2004 to 2017.

| Trajectory                 | OHS trajectory comparison        |                    |
|----------------------------|----------------------------------|--------------------|
|                            | Low/increasing vs. No OHS visits |                    |
|                            | Model 1*                         | Model 2**          |
| <b>Men</b>                 |                                  |                    |
| Managers or professionals  | 1.00                             | 1.00               |
| Semi-professionals         | 1.55 (1.04 - 2.31)               | 1.31 (0.85 - 2.03) |
| Routine non-manual workers | 1.71 (1.24 - 2.37)               | 1.40 (0.96 - 2.06) |
| Manual workers             | 1.38 (1.00 - 1.90)               | 1.12 (0.76 - 1.66) |
| <b>Women</b>               |                                  |                    |
| Managers or professionals  | 1.00                             | 1.00               |
| Semi-professionals         | 1.25 (1.02 - 1.54)               | 1.19 (0.92 - 1.53) |
| Routine non-manual workers | 1.47 (1.24 - 1.76)               | 1.40 (1.11 - 1.76) |
| Manual workers             | 1.64 (1.28 - 2.11)               | 1.55 (1.16 - 2.08) |
| Trajectory                 | Low/decreasing vs. No OHS visits |                    |
|                            | Model 1*                         | Model 2**          |
| <b>Men</b>                 |                                  |                    |
| Managers or professionals  | 1.00                             | 1.00               |
| Semi-professionals         | 1.32 (0.91 - 1.91)               | 1.45 (0.96 - 2.19) |
| Routine non-manual workers | 1.31 (0.97 - 1.77)               | 1.53 (1.05 - 2.22) |
| Manual workers             | 1.26 (0.94 - 1.68)               | 1.50 (1.04 - 2.18) |
| <b>Women</b>               |                                  |                    |
| Managers or professionals  | 1.00                             | 1.00               |
| Semi-professionals         | 1.48 (1.24 - 1.77)               | 1.71 (1.36 - 2.15) |
| Routine non-manual workers | 1.33 (1.13 - 1.56)               | 1.67 (1.34 - 2.07) |

1  
2  
3  
4  
5  
6  
7  
8  
9  
10  
11  
12  
13  
14  
15  
16  
17  
18  
19  
20  
21  
22  
23  
24  
25  
26  
27  
28  
29  
30  
31  
32  
33  
34  
35  
36  
37  
38  
39  
40  
41  
42  
43  
44  
45  
46  
47  
48  
49  
50  
51  
52  
53  
54  
55  
56  
57  
58  
59  
60

|                            | High/recurrent vs. No OHS visits |                    |
|----------------------------|----------------------------------|--------------------|
| Trajectory                 | Model 1*                         | Model 2**          |
| <b>Men</b>                 |                                  |                    |
| Manual workers             | 1.30 (1.02 - 1.65)               | 1.65 (1.25 - 2.19) |
| Managers or professionals  | 1.00                             | 1.00               |
| Semi-professionals         | 3.21 (1.62 - 6.36)               | 2.60 (1.23 - 5.49) |
| Routine non-manual workers | 3.99 (2.22 - 7.17)               | 2.92 (1.48 - 5.74) |
| Manual workers             | 5.02 (2.86 - 8.80)               | 3.56 (1.83 - 6.92) |
| <b>Women</b>               |                                  |                    |
| Managers or professionals  | 1.00                             | 1.00               |
| Semi-professionals         | 2.13 (1.61 - 2.81)               | 2.29 (1.62 - 3.24) |
| Routine non-manual workers | 2.53 (1.98 - 3.25)               | 2.28 (1.65 - 3.15) |
| Manual workers             | 3.10 (2.25 - 4.27)               | 2.71 (1.85 - 3.97) |

Model 1\* = Model adjusted for age and first language, Model 2\*\* = M1 + education

Figure 1. Four occupational health service trajectories, based on registers covering the years 2004 to 2017 among 9762 the City of Helsinki employees aged 20-34 years. 1 = No visits, 2 = Low/increasing, 3 = Low/decreasing, 4 = High/recurrent use.



Figure 1. Four occupational health service trajectories, based on registers covering the years 2004 to 2017 among 9762 the City of Helsinki employees aged 20-34 years. 1 = No visits, 2 = Low/increasing, 3 = Low/decreasing, 4 = High/recurrent use.

## Web-appendix 1. Comparison between those included\* and those not included\* in the present study, men

| Men                                | Total |       | Included |       | Excluded |       |
|------------------------------------|-------|-------|----------|-------|----------|-------|
|                                    | N     | %     | N        | %     | N        | %     |
| <b>Total</b>                       | 6413  | 100.0 | 2454     | 100.0 | 3959     | 100.0 |
| <b>Age</b>                         |       |       |          |       |          |       |
| 20 - 24                            | 2170  | 33.8  | 618      | 25.2  | 1552     | 39.2  |
| 25 - 29                            | 2507  | 39.1  | 1077     | 43.9  | 1430     | 36.1  |
| 30 - 34                            | 1736  | 27.1  | 759      | 30.9  | 977      | 24.7  |
| <b>Language</b>                    |       |       |          |       |          |       |
| Finnish                            | 5580  | 87.0  | 2154     | 87.8  | 3426     | 86.5  |
| Swedish                            | 274   | 4.3   | 81       | 3.3   | 193      | 4.9   |
| Other                              | 501   | 7.8   | 193      | 7.9   | 308      | 7.8   |
| <b>Education</b>                   |       |       |          |       |          |       |
| Basic education / Lower secondary  | 4604  | 71.8  | 1595     | 65.0  | 3009     | 76.0  |
| Upper secondary                    | 927   | 14.5  | 476      | 19.4  | 451      | 11.4  |
| Higher education                   | 882   | 13.8  | 383      | 15.6  | 499      | 12.6  |
| <b>Occupational class</b>          |       |       |          |       |          |       |
| Managers or professionals          | 1331  | 20.8  | 594      | 24.2  | 737      | 18.6  |
| Semi-professionals                 | 587   | 9.2   | 286      | 11.7  | 301      | 7.6   |
| Routine non-manual workers         | 1918  | 29.9  | 677      | 27.6  | 1241     | 31.3  |
| Manual workers                     | 2043  | 31.9  | 897      | 36.6  | 1146     | 28.9  |
| <b>Working hours per week</b>      |       |       |          |       |          |       |
| 32–45 h/wk                         | 5003  | 78.0  | 1967     | 80.2  | 3036     | 76.7  |
| <32 h/wk                           | 1410  | 22.0  | 487      | 19.8  | 923      | 23.3  |
| <b>Type of employment contract</b> |       |       |          |       |          |       |
| Permanent contract                 | 4603  | 71.8  | 2117     | 86.3  | 2486     | 62.8  |
| Other contract type                | 1810  | 28.2  | 337      | 13.7  | 1473     | 37.2  |

\*Included = employed by the City of Helsinki for at least 4 years and complete data on occupational position, Not included= employed by the City of Helsinki less than 4 years or incomplete data on occupational position.



Web-appendix 2. Comparison between those included\* and those not included\* in the present study, women

| Women                              | Total |       | Included |       | Excluded |       |
|------------------------------------|-------|-------|----------|-------|----------|-------|
|                                    | N     | %     | N        | %     | N        | %     |
| <b>Total</b>                       | 16163 | 100.0 | 7308     | 100.0 | 8855     | 100.0 |
| <b>Age</b>                         |       |       |          |       |          |       |
| 20 - 24                            | 5609  | 34.7  | 2252     | 30.8  | 3357     | 37.9  |
| 25 - 29                            | 6735  | 41.7  | 3152     | 43.1  | 3583     | 40.5  |
| 30 - 34                            | 3819  | 23.6  | 1904     | 26.1  | 1915     | 21.6  |
| <b>Language</b>                    |       |       |          |       |          |       |
| Finnish                            | 14028 | 86.8  | 6451     | 88.3  | 7577     | 85.6  |
| Swedish                            | 803   | 5.0   | 324      | 4.4   | 479      | 5.4   |
| Other                              | 1137  | 7.0   | 448      | 6.1   | 689      | 7.8   |
| <b>Education</b>                   |       |       |          |       |          |       |
| Basic education / Lower secondary  | 8785  | 54.4  | 3641     | 49.8  | 5144     | 58.1  |
| Upper secondary                    | 4420  | 27.3  | 2319     | 31.7  | 2101     | 23.7  |
| Higher education                   | 2958  | 18.3  | 1348     | 18.4  | 1610     | 18.2  |
| <b>Occupational class</b>          |       |       |          |       |          |       |
| Managers or professionals          | 3674  | 22.7  | 1679     | 23.0  | 1995     | 22.5  |
| Semi-professionals                 | 2833  | 17.5  | 1538     | 21.0  | 1295     | 14.6  |
| Routine non-manual workers         | 7561  | 46.8  | 3385     | 46.3  | 4176     | 47.2  |
| Manual workers                     | 1875  | 11.6  | 706      | 9.7   | 1169     | 13.2  |
| <b>Working hours per week</b>      |       |       |          |       |          |       |
| 32–45 h/wk                         | 12678 | 78.4  | 5891     | 80.6  | 6787     | 76.6  |
| <32 h/wk                           | 3485  | 21.6  | 1417     | 19.4  | 2068     | 23.4  |
| <b>Type of employment contract</b> |       |       |          |       |          |       |
| Permanent contract                 | 13059 | 80.8  | 6422     | 87.9  | 6637     | 75.0  |
| Other contract type                | 3104  | 19.2  | 886      | 12.1  | 2218     | 25.0  |

\*Included = employed by the City of Helsinki for at least 4 years and complete data on occupational position, Not included= employed by the City of Helsinki less than 4 years or incomplete data on occupational position.

Web-appendix 3. Multinomial logistic regression on occupational class with reversed order of categories as a determinant of occupational health service (OHS) trajectories among 9762 City of Helsinki employees aged 20-34 years. Results are based on register data covering the years from 2004 to 2017.

| <b>OHS trajectory comparison</b>                                                                                                               |                                  |                  |
|------------------------------------------------------------------------------------------------------------------------------------------------|----------------------------------|------------------|
|                                                                                                                                                | Low/increasing vs. No OHS visits |                  |
|                                                                                                                                                | Model 1*                         | Model 2**        |
| <b>Men</b>                                                                                                                                     |                                  |                  |
| <b>Occupational class</b>                                                                                                                      |                                  |                  |
| Worker occupations***                                                                                                                          | 1.00                             | 1.00             |
| Semi-professionals                                                                                                                             | 1.02 (0.72-1.44)                 | 1.04 (0.72-1.50) |
| Managers or professionals                                                                                                                      | 0.65 (0.49-0.88)                 | 0.79 (0.55-1.13) |
| <b>Women</b>                                                                                                                                   |                                  |                  |
| <b>Occupational class</b>                                                                                                                      |                                  |                  |
| Worker occupations                                                                                                                             | 1.00                             | 1.00             |
| Semi-professionals                                                                                                                             | 0.83 (0.70-0.99)                 | 0.84 (0.69-1.02) |
| Managers or professionals                                                                                                                      | 0.67 (0.56-0.79)                 | 0.70 (0.56-0.89) |
| <b>Low/decreasing vs. No OHS visits</b>                                                                                                        |                                  |                  |
|                                                                                                                                                | Model 1*                         | Model 2**        |
| <b>Men</b>                                                                                                                                     |                                  |                  |
| <b>Occupational class</b>                                                                                                                      |                                  |                  |
| Worker occupations                                                                                                                             | 1.00                             | 1.00             |
| Semi-professionals                                                                                                                             | 1.03 (0.74-1.43)                 | 0.96 (0.68-1.36) |
| Managers or professionals                                                                                                                      | 0.78 (0.60-1.02)                 | 0.66 (0.47-0.93) |
| <b>Women</b>                                                                                                                                   |                                  |                  |
| <b>Occupational class</b>                                                                                                                      |                                  |                  |
| Worker occupations                                                                                                                             | 1.00                             | 1.00             |
| Semi-professionals                                                                                                                             | 1.12 (0.97-1.30)                 | 1.02 (0.86-1.22) |
| Managers or professionals                                                                                                                      | 0.76 (0.65-0.88)                 | 0.60 (0.48-0.74) |
| <b>High/recurrent vs. No OHS visits</b>                                                                                                        |                                  |                  |
|                                                                                                                                                | Model 1*                         | Model 2**        |
| <b>Men</b>                                                                                                                                     |                                  |                  |
| <b>Occupational class</b>                                                                                                                      |                                  |                  |
| Worker occupations                                                                                                                             | 1.00                             | 1.00             |
| Semi-professionals                                                                                                                             | 0.70 (0.43-1.15)                 | 0.80 (0.47-1.34) |
| Managers or professionals                                                                                                                      | 0.21 (0.13-0.38)                 | 0.31 (0.16-0.58) |
| <b>Women</b>                                                                                                                                   |                                  |                  |
| <b>Occupational class</b>                                                                                                                      |                                  |                  |
| Worker occupations                                                                                                                             | 1.00                             | 1.00             |
| Semi-professionals                                                                                                                             | 0.81 (0.66-0.99)                 | 0.98 (0.77-1.24) |
| Managers or professionals                                                                                                                      | 0.38 (0.30-0.49)                 | 0.42 (0.31-0.59) |
| * Model adjusted for age and language ** Model 1 adjusted for education *** Combined class for routine non-manual employees and manual workers |                                  |                  |

## STROBE Statement—checklist of items that should be included in reports of observational studies

## Young Employees' Trajectories and Occupational Class Differences in Utilization of Primary Care Services Provided by Occupational Health Service

Hilla Sumanen, PhD

Jaakko Harkko, PhD

Kustaa Piha, PhD

Olli Pietiläinen, MSc

Ossi Rahkonen, Professor

Anne Kouvonen, Professor

|                           | Item No | Recommendation                                                                                                                                                                                                                                                                                                                                                                                                                                                         | Done, page |
|---------------------------|---------|------------------------------------------------------------------------------------------------------------------------------------------------------------------------------------------------------------------------------------------------------------------------------------------------------------------------------------------------------------------------------------------------------------------------------------------------------------------------|------------|
| <b>Title and abstract</b> | 1       | (a) Indicate the study's design with a commonly used term in the title or the abstract                                                                                                                                                                                                                                                                                                                                                                                 | 3          |
|                           |         | (b) Provide in the abstract an informative and balanced summary of what was done and what was found                                                                                                                                                                                                                                                                                                                                                                    | 3          |
| <b>Introduction</b>       |         |                                                                                                                                                                                                                                                                                                                                                                                                                                                                        |            |
| Background/rationale      | 2       | Explain the scientific background and rationale for the investigation being reported                                                                                                                                                                                                                                                                                                                                                                                   | 4-5        |
| Objectives                | 3       | State specific objectives, including any prespecified hypotheses                                                                                                                                                                                                                                                                                                                                                                                                       | 5          |
| <b>Methods</b>            |         |                                                                                                                                                                                                                                                                                                                                                                                                                                                                        |            |
| Study design              | 4       | Present key elements of study design early in the paper                                                                                                                                                                                                                                                                                                                                                                                                                | 5          |
| Setting                   | 5       | Describe the setting, locations, and relevant dates, including periods of recruitment, exposure, follow-up, and data collection                                                                                                                                                                                                                                                                                                                                        | 5-6        |
| Participants              | 6       | (a) <i>Cohort study</i> —Give the eligibility criteria, and the sources and methods of selection of participants. Describe methods of follow-up<br><i>Case-control study</i> —Give the eligibility criteria, and the sources and methods of case ascertainment and control selection. Give the rationale for the choice of cases and controls<br><i>Cross-sectional study</i> —Give the eligibility criteria, and the sources and methods of selection of participants | 5-6        |
|                           |         | (b) <i>Cohort study</i> —For matched studies, give matching criteria and number of exposed and unexposed<br><i>Case-control study</i> —For matched studies, give matching criteria and the number of controls per case                                                                                                                                                                                                                                                 |            |
| Variables                 | 7       | Clearly define all outcomes, exposures, predictors, potential confounders, and effect modifiers. Give diagnostic criteria, if applicable                                                                                                                                                                                                                                                                                                                               | 6-7        |
| Data sources/measurement  | 8*      | For each variable of interest, give sources of data and details of methods of assessment (measurement). Describe comparability of assessment methods if there is more than one group                                                                                                                                                                                                                                                                                   | 6          |
| Bias                      | 9       | Describe any efforts to address potential sources of bias                                                                                                                                                                                                                                                                                                                                                                                                              | 7, 14-     |

|                        |    |                                                                                                                                                                                                                                                                                                           |     |
|------------------------|----|-----------------------------------------------------------------------------------------------------------------------------------------------------------------------------------------------------------------------------------------------------------------------------------------------------------|-----|
|                        |    |                                                                                                                                                                                                                                                                                                           | 15  |
| Study size             | 10 | Explain how the study size was arrived at                                                                                                                                                                                                                                                                 | 5-6 |
| Quantitative variables | 11 | Explain how quantitative variables were handled in the analyses. If applicable, describe which groupings were chosen and why                                                                                                                                                                              | 7   |
| Statistical methods    | 12 | (a) Describe all statistical methods, including those used to control for confounding                                                                                                                                                                                                                     | 7   |
|                        |    | (b) Describe any methods used to examine subgroups and interactions                                                                                                                                                                                                                                       | 7   |
|                        |    | (c) Explain how missing data were addressed                                                                                                                                                                                                                                                               |     |
|                        |    | (d) <i>Cohort study</i> —If applicable, explain how loss to follow-up was addressed<br><i>Case-control study</i> —If applicable, explain how matching of cases and controls was addressed<br><i>Cross-sectional study</i> —If applicable, describe analytical methods taking account of sampling strategy |     |
|                        |    | (e) Describe any sensitivity analyses                                                                                                                                                                                                                                                                     | 10  |

| <b>Results</b>           |     |                                                                                                                                                                                                              | <b>Done, page</b> |
|--------------------------|-----|--------------------------------------------------------------------------------------------------------------------------------------------------------------------------------------------------------------|-------------------|
| Participants             | 13* | (a) Report numbers of individuals at each stage of study—eg numbers potentially eligible, examined for eligibility, confirmed eligible, included in the study, completing follow-up, and analysed            | 5-8               |
|                          |     | (b) Give reasons for non-participation at each stage                                                                                                                                                         |                   |
|                          |     | (c) Consider use of a flow diagram                                                                                                                                                                           |                   |
| Descriptive data         | 14* | (a) Give characteristics of study participants (eg demographic, clinical, social) and information on exposures and potential confounders                                                                     | 7-8               |
|                          |     | (b) Indicate number of participants with missing data for each variable of interest                                                                                                                          |                   |
|                          |     | (c) <i>Cohort study</i> —Summarise follow-up time (eg, average and total amount)                                                                                                                             | 5-6, 8            |
| Outcome data             | 15* | <i>Cohort study</i> —Report numbers of outcome events or summary measures over time                                                                                                                          | 6, 8              |
|                          |     | <i>Case-control study</i> —Report numbers in each exposure category, or summary measures of exposure                                                                                                         |                   |
|                          |     | <i>Cross-sectional study</i> —Report numbers of outcome events or summary measures                                                                                                                           |                   |
| Main results             | 16  | (a) Give unadjusted estimates and, if applicable, confounder-adjusted estimates and their precision (eg, 95% confidence interval). Make clear which confounders were adjusted for and why they were included | 7-10              |
|                          |     | (b) Report category boundaries when continuous variables were categorized                                                                                                                                    |                   |
|                          |     | (c) If relevant, consider translating estimates of relative risk into absolute risk for a meaningful time period                                                                                             |                   |
| Other analyses           | 17  | Report other analyses done—eg analyses of subgroups and interactions, and sensitivity analyses                                                                                                               | 10                |
| <b>Discussion</b>        |     |                                                                                                                                                                                                              |                   |
| Key results              | 18  | Summarise key results with reference to study objectives                                                                                                                                                     | 10-11             |
| Limitations              | 19  | Discuss limitations of the study, taking into account sources of potential bias or imprecision. Discuss both direction and magnitude of any potential bias                                                   | 14-15             |
| Interpretation           | 20  | Give a cautious overall interpretation of results considering objectives, limitations, multiplicity of analyses, results from similar studies, and other relevant evidence                                   | 10-15             |
| Generalisability         | 21  | Discuss the generalisability (external validity) of the study results                                                                                                                                        | 10-15             |
| <b>Other information</b> |     |                                                                                                                                                                                                              |                   |

|         |    |                                                                                                                                                               |    |
|---------|----|---------------------------------------------------------------------------------------------------------------------------------------------------------------|----|
| Funding | 22 | Give the source of funding and the role of the funders for the present study and, if applicable, for the original study on which the present article is based | 16 |
|---------|----|---------------------------------------------------------------------------------------------------------------------------------------------------------------|----|

\*Give information separately for cases and controls in case-control studies and, if applicable, for exposed and unexposed groups in cohort and cross-sectional studies.

**Note:** An Explanation and Elaboration article discusses each checklist item and gives methodological background and published examples of transparent reporting. The STROBE checklist is best used in conjunction with this article (freely available on the Web sites of PLoS Medicine at <http://www.plosmedicine.org/>, Annals of Internal Medicine at <http://www.annals.org/>, and Epidemiology at <http://www.epidem.com/>). Information on the STROBE Initiative is available at [www.strobe-statement.org](http://www.strobe-statement.org).

For peer review only
