# Supplementary material for: Association between socioeconomic position and occupational health service utilisation trajectories among young municipal employees in Finland
Source: PubMed Central journal article supplement (PMC6887011; doi:10.1136/bmjopen-2018-028742), 2019-11-27
Supplement: bmjopen-2018-028742supp001.pdf [file bmjopen-2018-028742supp001.pdf]

## Web-appendix 1. Comparison between those included\* and those not included\* in the present study, men

| Men                                | Total |       | Included |       | Excluded |       |
|------------------------------------|-------|-------|----------|-------|----------|-------|
|                                    | N     | %     | N        | %     | N        | %     |
| <b>Total</b>                       | 6413  | 100.0 | 2454     | 100.0 | 3959     | 100.0 |
| <b>Age</b>                         |       |       |          |       |          |       |
| 20 - 24                            | 2170  | 33.8  | 618      | 25.2  | 1552     | 39.2  |
| 25 - 29                            | 2507  | 39.1  | 1077     | 43.9  | 1430     | 36.1  |
| 30 - 34                            | 1736  | 27.1  | 759      | 30.9  | 977      | 24.7  |
| <b>Language</b>                    |       |       |          |       |          |       |
| Finnish                            | 5580  | 87.0  | 2154     | 87.8  | 3426     | 86.5  |
| Swedish                            | 274   | 4.3   | 81       | 3.3   | 193      | 4.9   |
| Other                              | 501   | 7.8   | 193      | 7.9   | 308      | 7.8   |
| <b>Education</b>                   |       |       |          |       |          |       |
| Basic education / Lower secondary  | 4604  | 71.8  | 1595     | 65.0  | 3009     | 76.0  |
| Upper secondary                    | 927   | 14.5  | 476      | 19.4  | 451      | 11.4  |
| Higher education                   | 882   | 13.8  | 383      | 15.6  | 499      | 12.6  |
| <b>Occupational class</b>          |       |       |          |       |          |       |
| Managers or professionals          | 1331  | 20.8  | 594      | 24.2  | 737      | 18.6  |
| Semi-professionals                 | 587   | 9.2   | 286      | 11.7  | 301      | 7.6   |
| Routine non-manual workers         | 1918  | 29.9  | 677      | 27.6  | 1241     | 31.3  |
| Manual workers                     | 2043  | 31.9  | 897      | 36.6  | 1146     | 28.9  |
| <b>Working hours per week</b>      |       |       |          |       |          |       |
| 32–45 h/wk                         | 5003  | 78.0  | 1967     | 80.2  | 3036     | 76.7  |
| <32 h/wk                           | 1410  | 22.0  | 487      | 19.8  | 923      | 23.3  |
| <b>Type of employment contract</b> |       |       |          |       |          |       |
| Permanent contract                 | 4603  | 71.8  | 2117     | 86.3  | 2486     | 62.8  |
| Other contract type                | 1810  | 28.2  | 337      | 13.7  | 1473     | 37.2  |

\*Included = employed by the City of Helsinki for at least 4 years and complete data on occupational position, Not included= employed by the City of Helsinki less than 4 years or incomplete data on occupational position.
