# Supplementary material for: Association between socioeconomic position and occupational health service utilisation trajectories among young municipal employees in Finland
Source: PubMed Central journal article supplement (PMC6887011; doi:10.1136/bmjopen-2018-028742), 2019-11-27
Supplement: bmjopen-2018-028742supp002.pdf [file bmjopen-2018-028742supp002.pdf]

Web-appendix 2. Comparison between those included\* and those not included\* in the present study, women

| Women                              | Total |       | Included |       | Excluded |       |
|------------------------------------|-------|-------|----------|-------|----------|-------|
|                                    | N     | %     | N        | %     | N        | %     |
| <b>Total</b>                       | 16163 | 100.0 | 7308     | 100.0 | 8855     | 100.0 |
| <b>Age</b>                         |       |       |          |       |          |       |
| 20 - 24                            | 5609  | 34.7  | 2252     | 30.8  | 3357     | 37.9  |
| 25 - 29                            | 6735  | 41.7  | 3152     | 43.1  | 3583     | 40.5  |
| 30 - 34                            | 3819  | 23.6  | 1904     | 26.1  | 1915     | 21.6  |
| <b>Language</b>                    |       |       |          |       |          |       |
| Finnish                            | 14028 | 86.8  | 6451     | 88.3  | 7577     | 85.6  |
| Swedish                            | 803   | 5.0   | 324      | 4.4   | 479      | 5.4   |
| Other                              | 1137  | 7.0   | 448      | 6.1   | 689      | 7.8   |
| <b>Education</b>                   |       |       |          |       |          |       |
| Basic education / Lower secondary  | 8785  | 54.4  | 3641     | 49.8  | 5144     | 58.1  |
| Upper secondary                    | 4420  | 27.3  | 2319     | 31.7  | 2101     | 23.7  |
| Higher education                   | 2958  | 18.3  | 1348     | 18.4  | 1610     | 18.2  |
| <b>Occupational class</b>          |       |       |          |       |          |       |
| Managers or professionals          | 3674  | 22.7  | 1679     | 23.0  | 1995     | 22.5  |
| Semi-professionals                 | 2833  | 17.5  | 1538     | 21.0  | 1295     | 14.6  |
| Routine non-manual workers         | 7561  | 46.8  | 3385     | 46.3  | 4176     | 47.2  |
| Manual workers                     | 1875  | 11.6  | 706      | 9.7   | 1169     | 13.2  |
| <b>Working hours per week</b>      |       |       |          |       |          |       |
| 32–45 h/wk                         | 12678 | 78.4  | 5891     | 80.6  | 6787     | 76.6  |
| <32 h/wk                           | 3485  | 21.6  | 1417     | 19.4  | 2068     | 23.4  |
| <b>Type of employment contract</b> |       |       |          |       |          |       |
| Permanent contract                 | 13059 | 80.8  | 6422     | 87.9  | 6637     | 75.0  |
| Other contract type                | 3104  | 19.2  | 886      | 12.1  | 2218     | 25.0  |

\*Included = employed by the City of Helsinki for at least 4 years and complete data on occupational position, Not included= employed by the City of Helsinki less than 4 years or incomplete data on occupational position.
