# Supplementary material for: Association between socioeconomic position and occupational health service utilisation trajectories among young municipal employees in Finland
Source: PubMed Central journal article supplement (PMC6887011; doi:10.1136/bmjopen-2018-028742), 2019-11-27
Supplement: bmjopen-2018-028742supp003.pdf [file bmjopen-2018-028742supp003.pdf]

Web-appendix 3. Multinomial logistic regression on occupational class with reversed order of categories as a determinant of occupational health service (OHS) trajectories among 9762 City of Helsinki employees aged 20-34 years. Results are based on register data covering the years from 2004 to 2017.

| <b>OHS trajectory comparison</b>                                                                                                               |                  |                  |
|------------------------------------------------------------------------------------------------------------------------------------------------|------------------|------------------|
| Low/increasing vs. No OHS visits                                                                                                               |                  |                  |
|                                                                                                                                                | Model 1*         | Model 2**        |
| <b>Men</b>                                                                                                                                     |                  |                  |
| <b>Occupational class</b>                                                                                                                      |                  |                  |
| Worker occupations***                                                                                                                          | 1.00             | 1.00             |
| Semi-professionals                                                                                                                             | 1.02 (0.72-1.44) | 1.04 (0.72-1.50) |
| Managers or professionals                                                                                                                      | 0.65 (0.49-0.88) | 0.79 (0.55-1.13) |
| <b>Women</b>                                                                                                                                   |                  |                  |
| <b>Occupational class</b>                                                                                                                      |                  |                  |
| Worker occupations                                                                                                                             | 1.00             | 1.00             |
| Semi-professionals                                                                                                                             | 0.83 (0.70-0.99) | 0.84 (0.69-1.02) |
| Managers or professionals                                                                                                                      | 0.67 (0.56-0.79) | 0.70 (0.56-0.89) |
| Low/decreasing vs. No OHS visits                                                                                                               |                  |                  |
|                                                                                                                                                | Model 1*         | Model 2**        |
| <b>Men</b>                                                                                                                                     |                  |                  |
| <b>Occupational class</b>                                                                                                                      |                  |                  |
| Worker occupations                                                                                                                             | 1.00             | 1.00             |
| Semi-professionals                                                                                                                             | 1.03 (0.74-1.43) | 0.96 (0.68-1.36) |
| Managers or professionals                                                                                                                      | 0.78 (0.60-1.02) | 0.66 (0.47-0.93) |
| <b>Women</b>                                                                                                                                   |                  |                  |
| <b>Occupational class</b>                                                                                                                      |                  |                  |
| Worker occupations                                                                                                                             | 1.00             | 1.00             |
| Semi-professionals                                                                                                                             | 1.12 (0.97-1.30) | 1.02 (0.86-1.22) |
| Managers or professionals                                                                                                                      | 0.76 (0.65-0.88) | 0.60 (0.48-0.74) |
| High/recurrent vs. No OHS visits                                                                                                               |                  |                  |
|                                                                                                                                                | Model 1*         | Model 2**        |
| <b>Men</b>                                                                                                                                     |                  |                  |
| <b>Occupational class</b>                                                                                                                      |                  |                  |
| Worker occupations                                                                                                                             | 1.00             | 1.00             |
| Semi-professionals                                                                                                                             | 0.70 (0.43-1.15) | 0.80 (0.47-1.34) |
| Managers or professionals                                                                                                                      | 0.21 (0.13-0.38) | 0.31 (0.16-0.58) |
| <b>Women</b>                                                                                                                                   |                  |                  |
| <b>Occupational class</b>                                                                                                                      |                  |                  |
| Worker occupations                                                                                                                             | 1.00             | 1.00             |
| Semi-professionals                                                                                                                             | 0.81 (0.66-0.99) | 0.98 (0.77-1.24) |
| Managers or professionals                                                                                                                      | 0.38 (0.30-0.49) | 0.42 (0.31-0.59) |
| * Model adjusted for age and language ** Model 1 adjusted for education *** Combined class for routine non-manual employees and manual workers |                  |                  |
